# Supplementary material for: Visible light-induced FeCl3-catalyzed chlorination of C–H bonds with MgCl2
Source: Royal Society of Chemistry journal article supplement (doi:10.1039/d4gc00664j), 2024-01-01
Supplement: d4gc00664j1.pdf [file d4gc00664j1.pdf]

# Supporting Information

## Visible light-induced FeCl<sub>3</sub>-catalyzed chlorination of C–H bonds with MgCl<sub>2</sub>

Jing Huang <sup>a,b</sup>, Yidong Liu <sup>b</sup>, Xia Tian<sup>b</sup>, Shao-Fei Ni<sup>\*c</sup>, Shen Li <sup>b</sup>, Zhan-Hui Zhang<sup>\*a</sup>, Dong Li <sup>c</sup>, Shouxin Liu<sup>\*b</sup>

<sup>a</sup>College of Chemistry and Material Science, Hebei Normal University, Shijiazhuang 050024, P. R. China. E-mail: zhanhui@hebtu.edu.cn

<sup>b</sup> State Key Laboratory of Molecular chemistry for Drug, Hebei Collaborative Innovation Center of New Drug Creation, Hebei University of Science & Technology, Shijiazhuang 050018, P. R. China.

E-mail: chsliu@hotmail.com

<sup>c</sup> Department of Chemistry and Key Laboratory for Preparation and Application of Ordered Structural Materials of Guangdong Province Shantou University, Shantou, Guangdong, 515063 P. R. China.

E-mail: sfni@stu.edu.cn

## Table of Contents

|                                                              |            |
|--------------------------------------------------------------|------------|
| <b>Section 1. Radical trapping experiments.....</b>          | <b>S3</b>  |
| <b>Section 2. Further details of proposed mechanism.....</b> | <b>S4</b>  |
| <b>Section 3. DFT studies experiments.....</b>               | <b>S4</b>  |
| <b>Section 4. NMR and GS-MS spectra .....</b>                | <b>S10</b> |

## Section 1. Radical trapping experiments

[Electron paramagnetic resonance (EPR) spectra were recorded on a Bruker A300 spectrophotometer. EPR spectra were obtained on solution samples (100 mM), using 1–20 mW microwave power and 100 kHz field modulation with the amplitude set to 1 G. The g-values for each EPR spectrum were extracted from simulations performed using Easy Spin (v5.2.23).]

**Figure S1.** ESR spectra of DMPO capturing generated chlorine radical

## Section 2. Further details of the proposed mechanism

Scheme S1 Chlorination reaction mechanism

## Section 3. DFT studies experiments

### Computational details:

All calculations were performed using Gaussian 16, Revision A.03 package.<sup>1</sup> All of the reactants, intermediates, transition states, products were optimized by the DFT with the  $\omega$ B97X-D functional.<sup>2</sup> For geometry optimizations and frequency calculations, BS-I basis set system was employed. In BS-I, we employed 6-31G(d) basis sets for all atom. All the stationary structures were characterized with no imaginary frequency and the transition state structures (TSs) were characterized with a single imaginary frequency. Intrinsic reaction coordinate (IRC) calculations were performed on the TSs. The solvent effect of acetonitrile was evaluated through the SMD method,<sup>3</sup> in which a better basis system BS-II was used. In BS-II, we employed def2tzvp basis sets for all atom. All reported energies are free energies at a concentration of 1 M.

**Figure S2.** DFT calculations on the chlorination of toluene reaction

**Cartesian coordinates of the optimized structures:**

**Int1**

E = -731.586799 a.u.

0 2

|    |             |             |             |
|----|-------------|-------------|-------------|
| C  | -3.33784600 | -1.41834900 | 1.06193400  |
| C  | -2.48271700 | -0.72453300 | 0.21641000  |
| C  | -2.62472600 | 0.65437500  | 0.04826200  |
| C  | -3.61814000 | 1.33613700  | 0.75284400  |
| C  | -4.47182500 | 0.64341300  | 1.60143500  |
| C  | -4.33267800 | -0.73306800 | 1.75582000  |
| H  | -3.22451300 | -2.49116400 | 1.18941900  |
| H  | -1.69523300 | -1.25358700 | -0.31880900 |
| H  | -3.71458200 | 2.41177800  | 0.64051400  |
| H  | -5.24650700 | 1.17956000  | 2.14428500  |
| H  | -5.00019800 | -1.27412200 | 2.41951200  |
| C  | -1.66831200 | 1.40642700  | -0.81543800 |
| H  | -1.25860000 | 0.79848600  | -1.64037700 |
| H  | -2.10093200 | 2.32639600  | -1.24037600 |
| Cl | 0.68998460  | 2.27312728  | 0.83792692  |
| H  | -0.81576484 | 1.70772164  | -0.18903168 |

**TS1**

E = -731.586482 a.u.

0 2

|   |             |             |            |
|---|-------------|-------------|------------|
| C | -3.33404600 | -1.41834900 | 1.06193400 |
| C | -2.47891700 | -0.72833300 | 0.21641000 |
| C | -2.61332600 | 0.66197500  | 0.04066200 |
| C | -3.61814000 | 1.33993700  | 0.75664400 |

|    |             |             |             |
|----|-------------|-------------|-------------|
| C  | -4.47182500 | 0.64721300  | 1.60143500  |
| C  | -4.33267800 | -0.73306800 | 1.75582000  |
| H  | -3.22451300 | -2.49116400 | 1.18561900  |
| H  | -1.69523300 | -1.25738700 | -0.31880900 |
| H  | -3.71838200 | 2.41557800  | 0.64051400  |
| H  | -5.24650700 | 1.17956000  | 2.14428500  |
| H  | -5.00019800 | -1.27412200 | 2.41951200  |
| C  | -1.69871200 | 1.39122700  | -0.82303800 |
| H  | -1.17500000 | 0.80988600  | -1.58337700 |
| H  | -2.03253200 | 2.36819600  | -1.17577600 |
| Cl | 0.55371200  | 2.22101100  | 0.74636900  |
| H  | -0.69463700 | 1.74906600  | -0.07988400 |

**Int2**

E = -270.811959 a.u.

0 2

|   |             |             |             |
|---|-------------|-------------|-------------|
| C | -3.02388584 | -1.22748275 | 1.30395430  |
| C | -2.12391529 | -0.36951162 | 0.67117473  |
| C | -2.52258761 | 0.91771202  | 0.31153962  |
| C | -3.82214377 | 1.34707371  | 0.58360373  |
| C | -4.72198725 | 0.48908944  | 1.21580760  |
| C | -4.32273678 | -0.79815585 | 1.57637452  |
| H | -2.70923276 | -2.24215501 | 1.58781424  |
| H | -1.09976476 | -0.70801949 | 0.45723569  |
| H | -4.13627270 | 2.36202716  | 0.29989819  |
| H | -5.74626212 | 0.82717860  | 1.43035579  |
| H | -5.03223678 | -1.47430259 | 2.07493681  |
| C | -1.52899795 | 1.86513725  | -0.38614587 |
| H | -1.61011280 | 1.74894167  | -1.44672070 |
| H | -1.75391604 | 2.87679324  | -0.11994292 |

**TS2**

E = -1191.123726 a.u.

0 2

|   |             |             |             |
|---|-------------|-------------|-------------|
| C | 0.01245500  | 0.32461400  | 0.29914000  |
| C | -0.01576500 | -0.23537000 | 1.56376400  |
| C | 1.18842900  | -0.51962000 | 2.26697600  |
| C | 2.41554800  | -0.20570200 | 1.61821300  |
| C | 2.43021500  | 0.35404900  | 0.35337100  |
| C | 1.23220800  | 0.62361100  | -0.31593700 |
| H | -0.91963100 | 0.53501700  | -0.21705600 |
| H | -0.96601800 | -0.46295100 | 2.03947100  |
| H | 3.34882700  | -0.41031100 | 2.13606000  |
| H | 3.37902500  | 0.58732200  | -0.12084100 |

|    |            |             |             |
|----|------------|-------------|-------------|
| H  | 1.24907500 | 1.06501100  | -1.30751600 |
| C  | 1.16631800 | -1.08081100 | 3.55844700  |
| H  | 0.22856400 | -1.31323800 | 4.05213800  |
| H  | 2.08642300 | -1.29043000 | 4.09378400  |
| Cl | 1.02045700 | 4.26325300  | 4.34883800  |
| Cl | 1.07809300 | 2.39800200  | 3.58228600  |

**P1**

E = -1191.167568 a.u.

0 2

|    |             |             |             |
|----|-------------|-------------|-------------|
| C  | -2.09702315 | -0.07912676 | 0.00086200  |
| C  | -0.70186315 | -0.07912676 | 0.00086200  |
| C  | -0.00432515 | 1.12862424  | 0.00086200  |
| C  | -0.70197915 | 2.33713324  | -0.00033700 |
| C  | -2.09680415 | 2.33705524  | -0.00081600 |
| C  | -2.79440515 | 1.12884924  | 0.00018000  |
| H  | -2.64678215 | -1.03144376 | 0.00131200  |
| H  | -0.15235515 | -1.03163976 | 0.00217700  |
| H  | -0.15177915 | 3.28927624  | -0.00039600 |
| H  | -2.64692615 | 3.28933624  | -0.00176900 |
| H  | -3.89400915 | 1.12903224  | 0.00000000  |
| C  | 1.53567459  | 1.12873627  | 0.00174986  |
| H  | 1.89292155  | 1.14115381  | -1.00677402 |
| H  | 1.89198081  | 1.99615182  | 0.51705186  |
| Cl | 2.12197863  | -0.31833783 | 0.81404544  |
| Cl | 2.91222360  | -2.39721996 | 2.32693036  |

**TS3**

E = -1191.158292 a.u.

0 2

|    |             |             |             |
|----|-------------|-------------|-------------|
| C  | 0.32105900  | 0.77210900  | 0.00896200  |
| C  | 0.52212900  | 0.86295600  | 1.38221100  |
| C  | 1.49520800  | 0.08047500  | 2.00603400  |
| C  | 2.26844000  | -0.79127100 | 1.23716900  |
| C  | 2.06939100  | -0.88185900 | -0.13660800 |
| C  | 1.09491800  | -0.10040500 | -0.75242400 |
| H  | -0.44152700 | 1.38132800  | -0.46643400 |
| H  | -0.07996800 | 1.54659500  | 1.97572800  |
| H  | 3.03110700  | -1.39921400 | 1.71721100  |
| H  | 2.67339000  | -1.56501200 | -0.72598000 |
| H  | 0.93706100  | -0.17298200 | -1.82427900 |
| C  | 1.71661500  | 0.17695200  | 3.48530900  |
| H  | 2.08078500  | -0.75915200 | 3.91057700  |
| Cl | 2.92371200  | 1.44506700  | 3.93023800  |

|    |             |            |            |
|----|-------------|------------|------------|
| H  | 0.79226700  | 0.45859200 | 4.01197900 |
| Cl | -1.50552800 | 0.09913700 | 4.44363500 |

**Int3**

E = -730.393263 a.u.

0 2

|    |             |             |             |
|----|-------------|-------------|-------------|
| C  | -0.00012500 | 0.19050100  | 0.16580900  |
| C  | 0.04614900  | -0.03192000 | 1.53162500  |
| C  | 1.28616100  | -0.18305900 | 2.18751400  |
| C  | 2.47457500  | -0.08831000 | 1.43854700  |
| C  | 2.41723500  | 0.13495600  | 0.07244300  |
| C  | 1.18454900  | 0.27401300  | -0.56783300 |
| H  | -0.95834400 | 0.30217000  | -0.33100800 |
| H  | -0.87284800 | -0.08350800 | 2.10848000  |
| H  | 3.43310100  | -0.18983200 | 1.93585300  |
| H  | 3.33679600  | 0.20480200  | -0.49956300 |
| H  | 1.14729400  | 0.45098900  | -1.63819400 |
| C  | 1.27067500  | -0.39009700 | 3.61106700  |
| H  | 0.34249300  | -0.67673900 | 4.09306600  |
| Cl | 2.65599000  | -0.99081600 | 4.43680900  |

**TS4**

E = -1650.702169 a.u.

0 2

|    |             |             |             |
|----|-------------|-------------|-------------|
| C  | -0.00012500 | 0.19050100  | 0.16580900  |
| C  | 0.04614900  | -0.03192000 | 1.53162500  |
| C  | 1.28616100  | -0.18305900 | 2.18751400  |
| C  | 2.47457500  | -0.08831000 | 1.43854700  |
| C  | 2.41723500  | 0.13495600  | 0.07244300  |
| C  | 1.18454900  | 0.27401300  | -0.56783300 |
| H  | -0.95834400 | 0.30217000  | -0.33100800 |
| H  | -0.87284800 | -0.08350800 | 2.10848000  |
| H  | 3.43310100  | -0.18983200 | 1.93585300  |
| H  | 3.33679600  | 0.20480200  | -0.49956300 |
| H  | 1.14729400  | 0.45098900  | -1.63819400 |
| C  | 1.27067500  | -0.39009700 | 3.61106700  |
| H  | 0.34249300  | -0.67673900 | 4.09306600  |
| Cl | 0.73804200  | 3.77369200  | 5.34406800  |
| Cl | 1.00919900  | 1.81047500  | 4.39120800  |
| Cl | 2.65599000  | -0.99081600 | 4.43680900  |

**P2**

E = -1650.735062 a.u.

0 2



|    |             |             |             |
|----|-------------|-------------|-------------|
| C  | -0.00012500 | 0.16800100  | 0.17480900  |
| C  | 0.04614900  | -0.00942000 | 1.54962500  |
| C  | 1.28166100  | -0.10655900 | 2.20101400  |
| C  | 2.47007500  | -0.05681000 | 1.46104700  |
| C  | 2.41723500  | 0.12145600  | 0.08594300  |
| C  | 1.18454900  | 0.25151300  | -0.55433300 |
| H  | -0.95834400 | 0.26617000  | -0.32650800 |
| H  | -0.87284800 | -0.02500800 | 2.13098000  |
| H  | 3.42410100  | -0.12683200 | 1.96735300  |
| H  | 3.33679600  | 0.17780200  | -0.48606300 |
| H  | 1.14729400  | 0.41498900  | -1.62469400 |
| C  | 1.26617500  | -0.12459700 | 3.70106700  |
| H  | 0.34699300  | -0.59123900 | 4.09756600  |
| Cl | 0.72004200  | 3.87719200  | 5.40706800  |
| Cl | 1.05869900  | 1.56297500  | 4.26520800  |
| Cl | 2.62899000  | -0.96381600 | 4.43230900  |

## Section 4. NMR and GS-MS spectra

### *Chlorination of toluene*

#### <sup>1</sup>HNMR of (chloromethyl)benzene (2a)

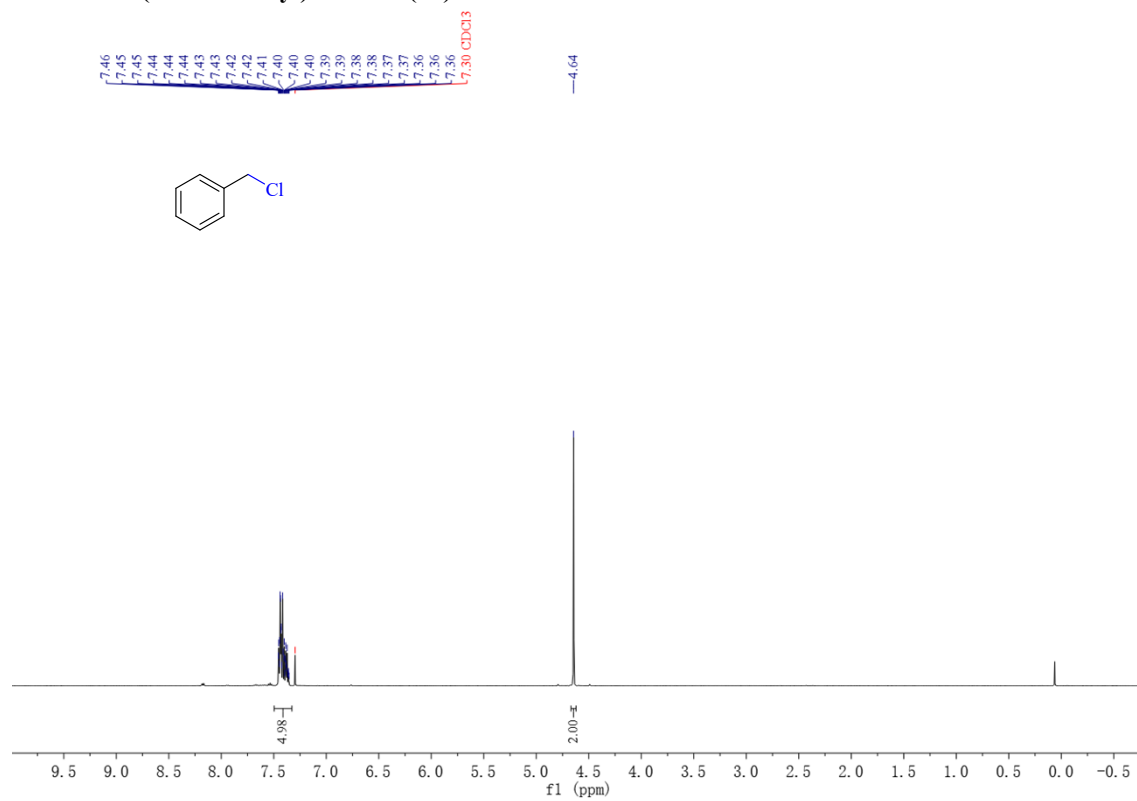

# GS-MS of Chlorination of toluene reaction solution

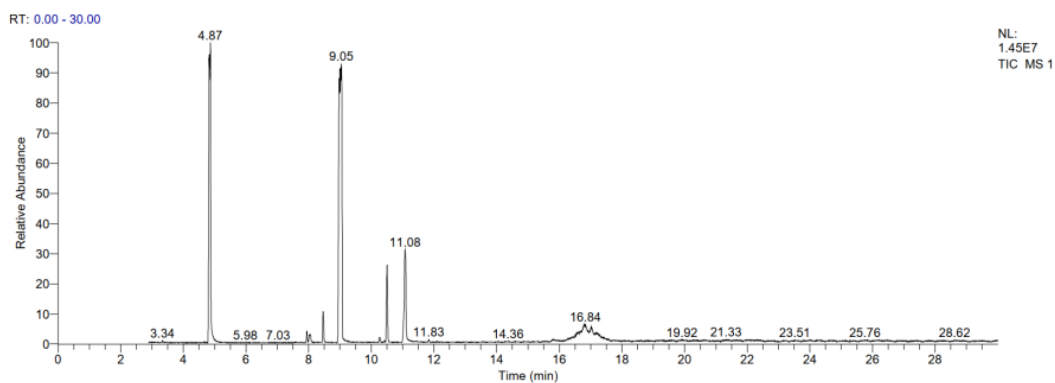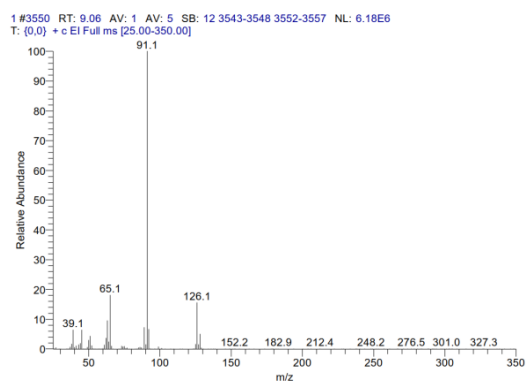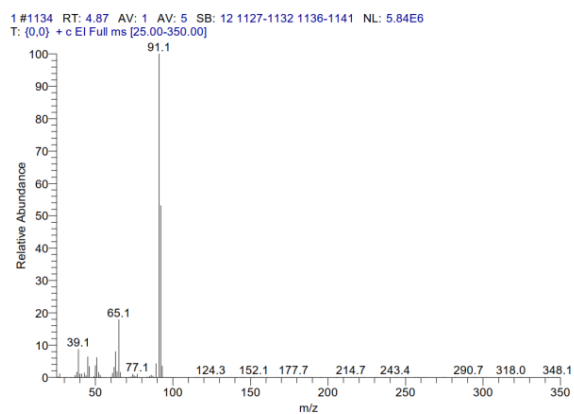



# GS-MS of Chlorination of o-Cl-toluene reaction solution

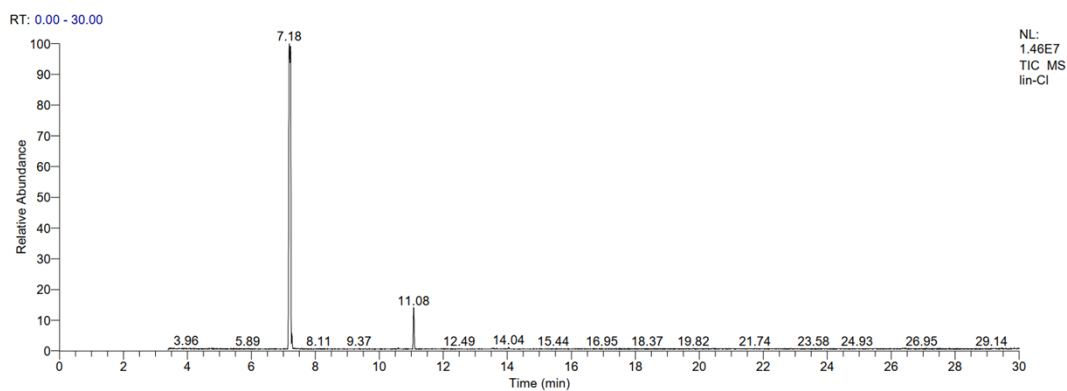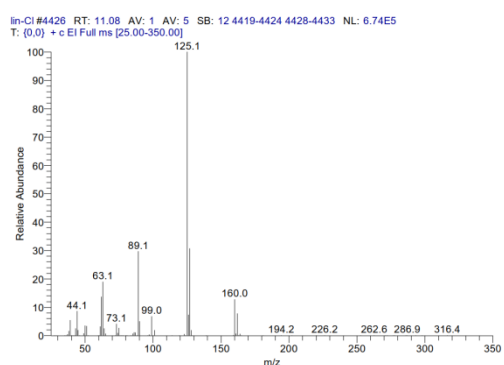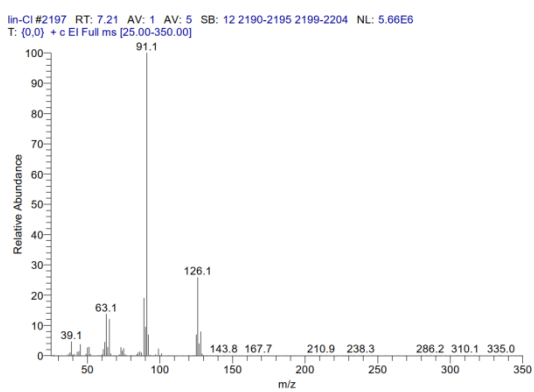

## Chlorination of *m*-Cl-toluene

### <sup>1</sup>HNMR of 3-Chlorobenzyl chloride (2c)

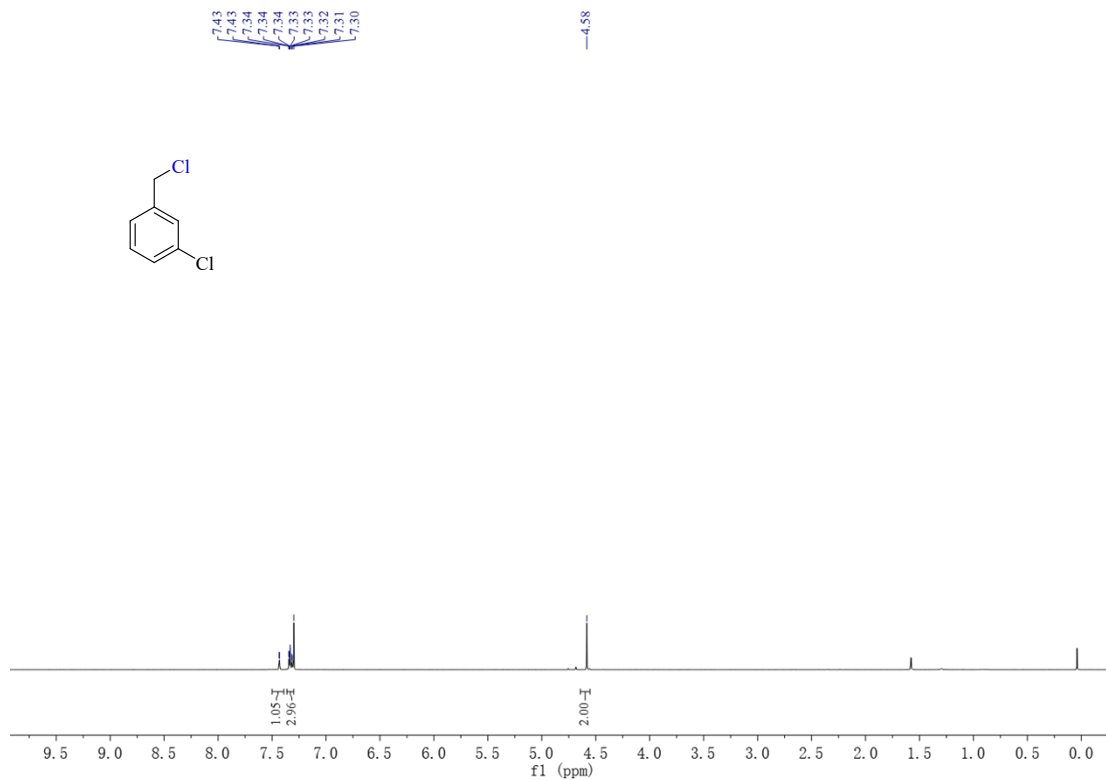

### <sup>13</sup>CNMR of 3-Chlorobenzyl chloride (2c)

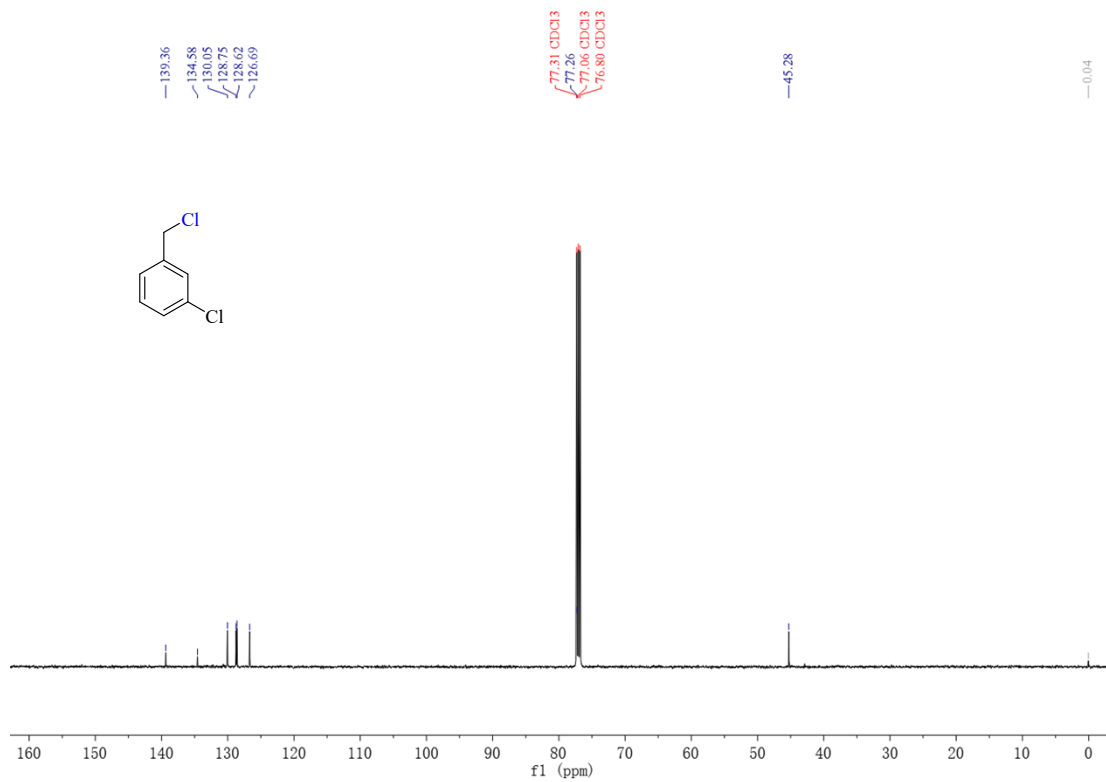

# GS-MS of Chlorination of *m*-Cl-toluene reaction solution

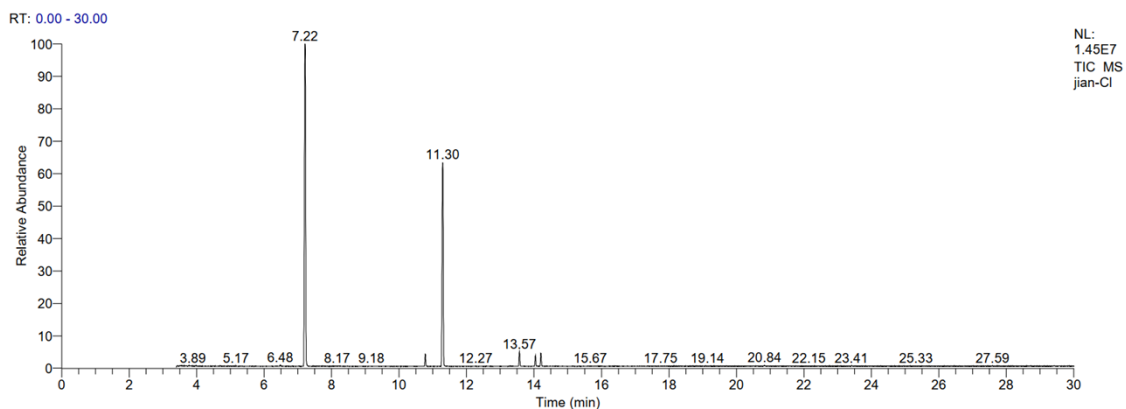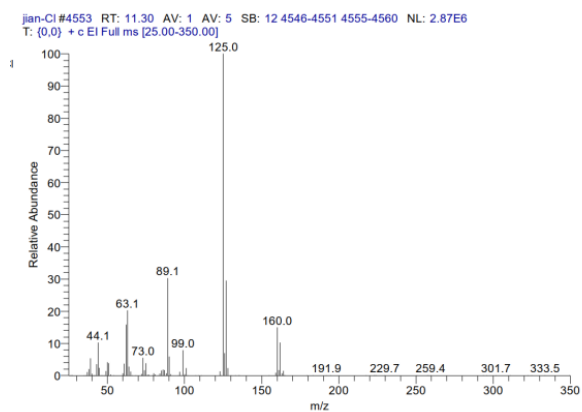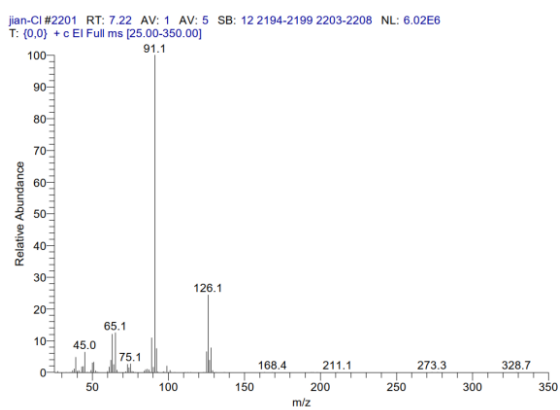

## Chlorination of *p*-Cl-toluene

### <sup>1</sup>HNMR of 4-Chlorobenzyl chloride (2d)

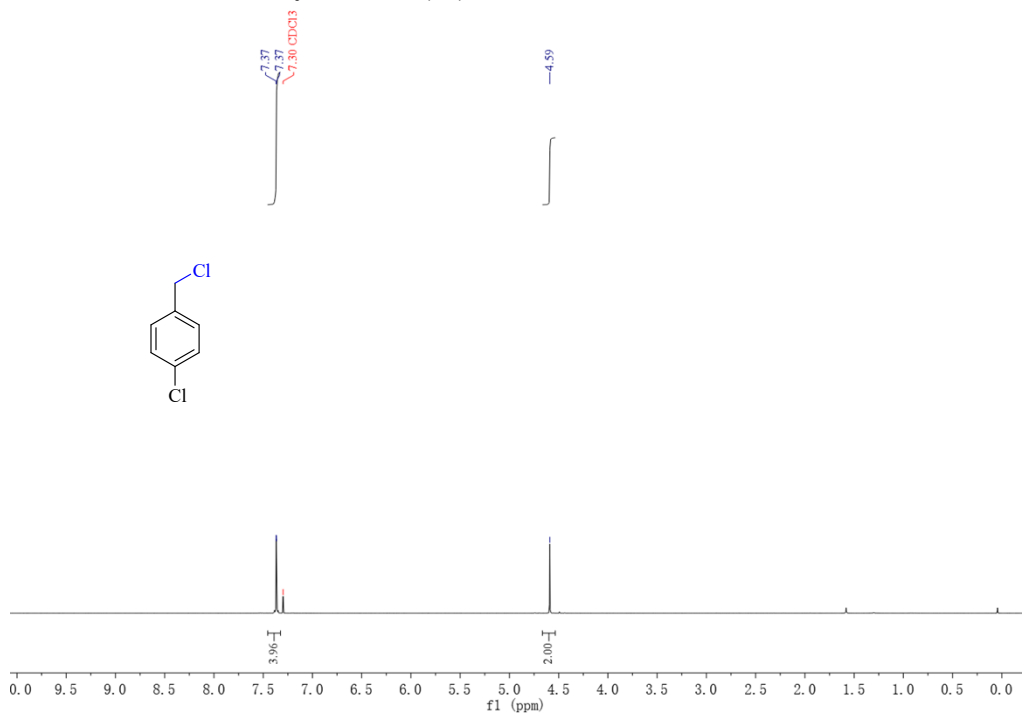

### <sup>13</sup>CNMR of 4-Chlorobenzyl chloride (2d)

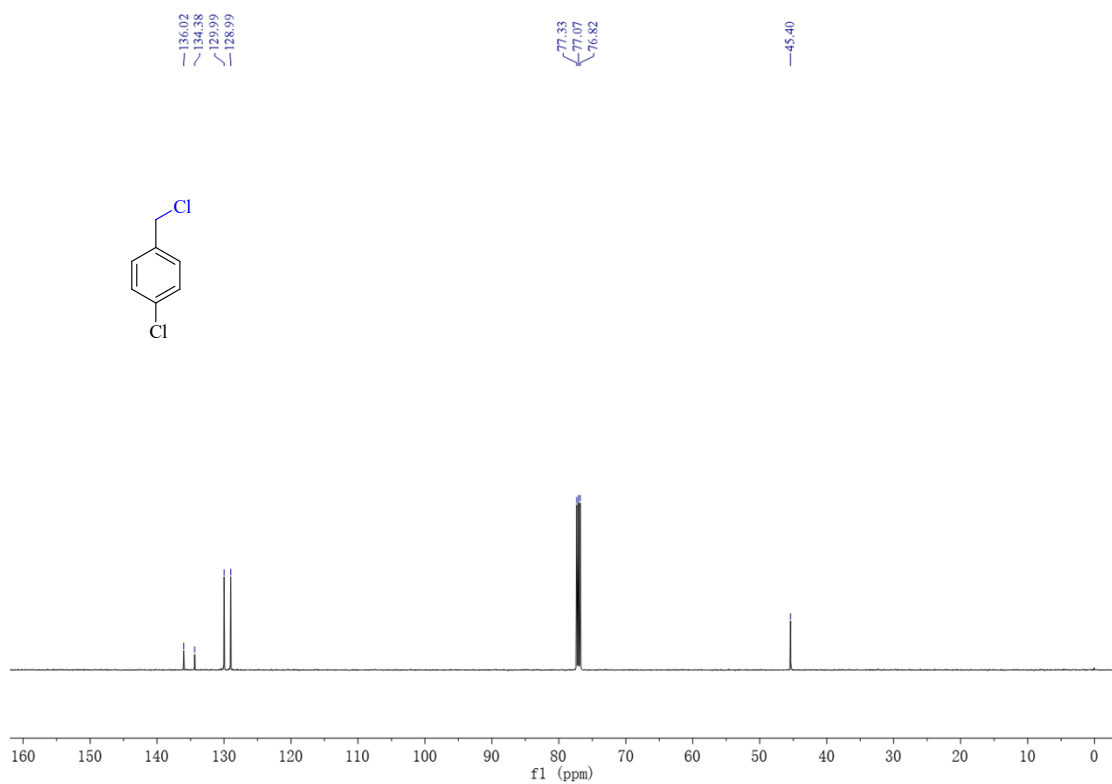



# GS-MS of Chlorination of *p*-Cl-toluene reaction solution

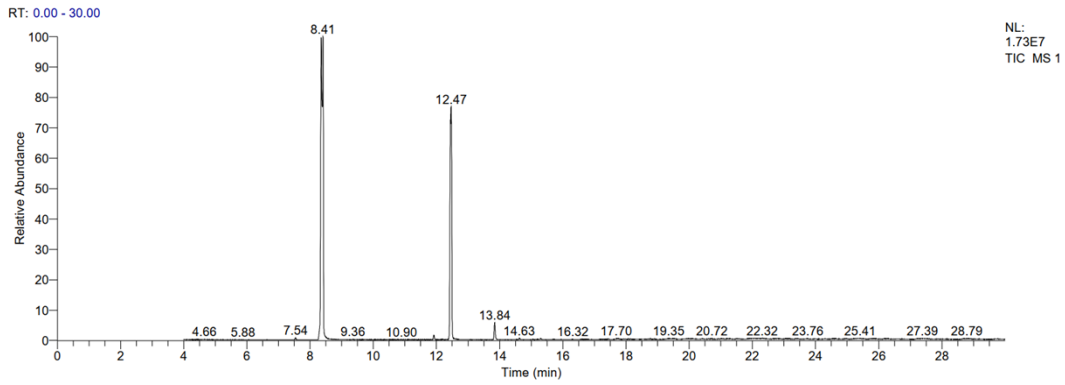

1 #4882 RT: 12.47 AV: 1 AV: 5 SB: 12 4875-4880 4884-4889 NL: 4.06E6  
T: (0.0) + c EI Full ms [25.00-350.00]

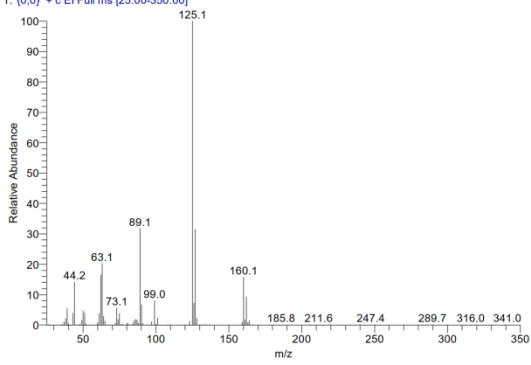

1 #2510 RT: 8.35 AV: 1 AV: 5 SB: 12 2503-2508 2512-2517 NL: 6.91E6  
T: (0.0) + c EI Full ms [25.00-350.00]

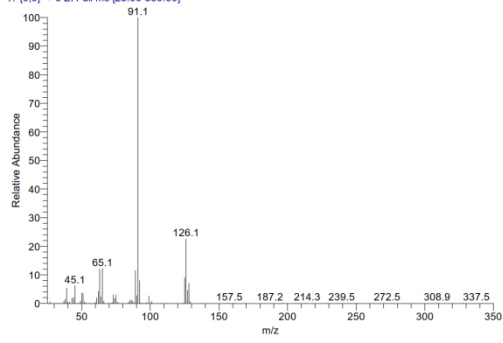

## Chlorination of 4-F-toluene

### <sup>1</sup>H NMR of 4-Fluorobenzyl chloride (2e)

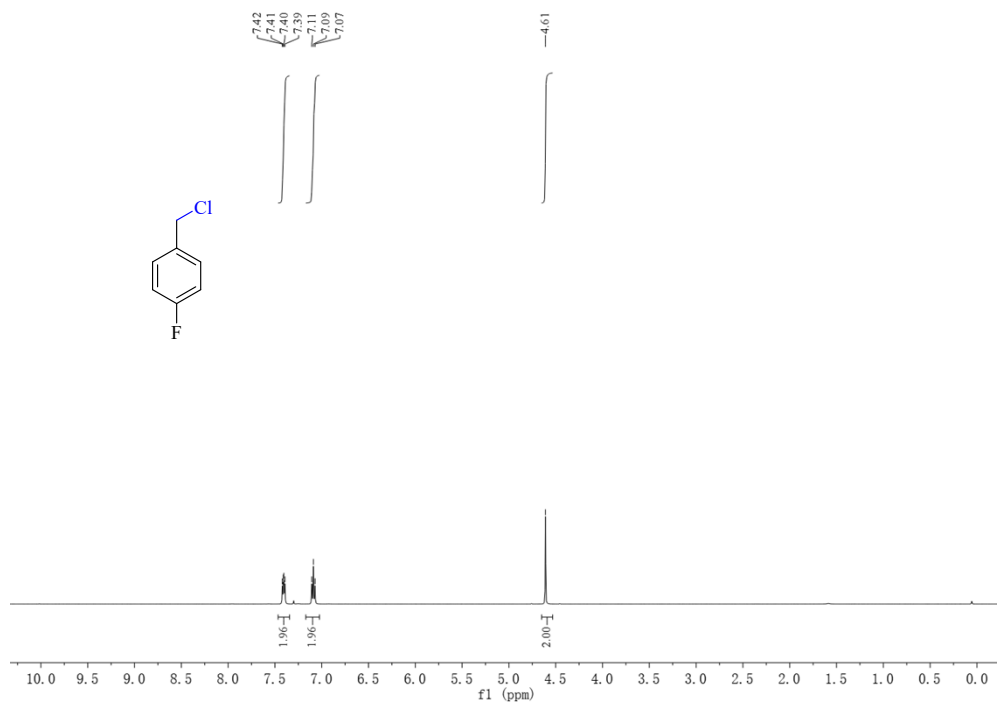

### <sup>13</sup>C NMR of 4-Fluorobenzyl chloride (2e)

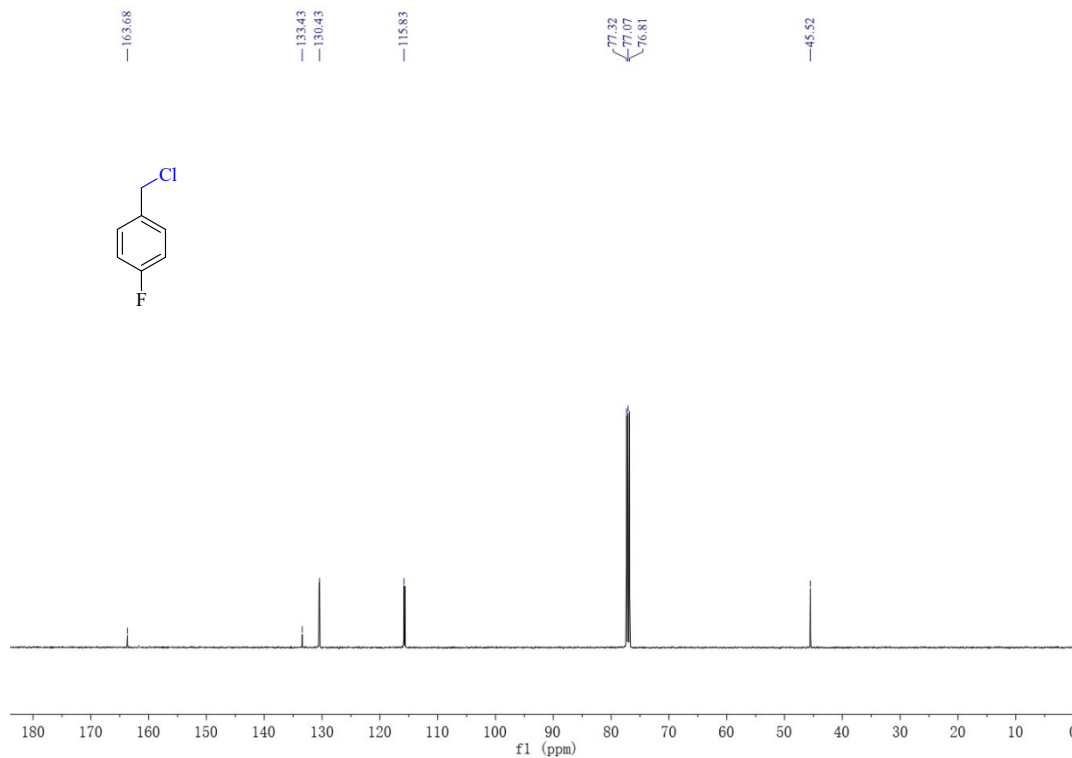

# GS-MS of Chlorination of 4-F-toluene reaction solution

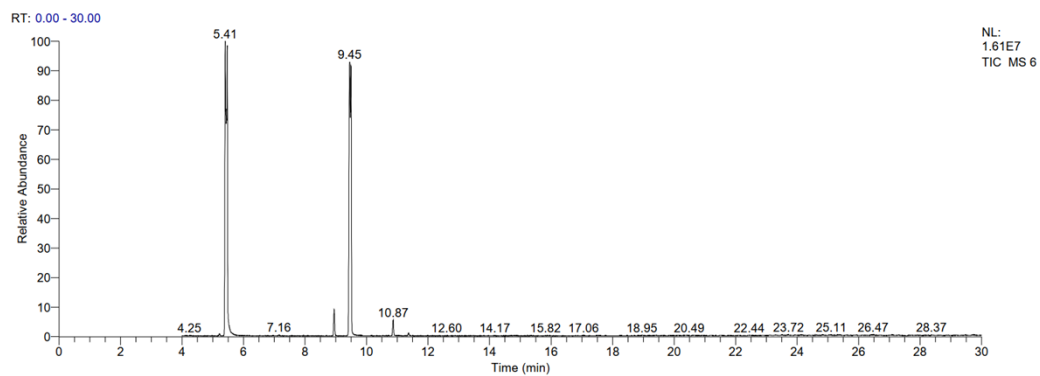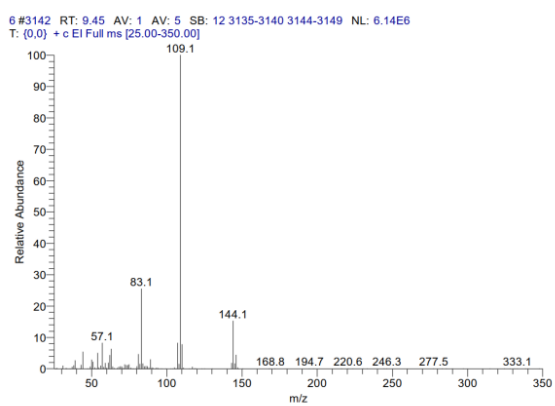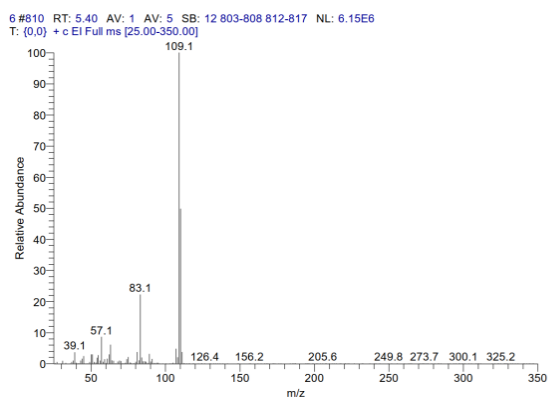

## Chlorination of 4-OMe-toluene

### <sup>1</sup>HNMR of 4-Methoxybenzyl chloride (2f)

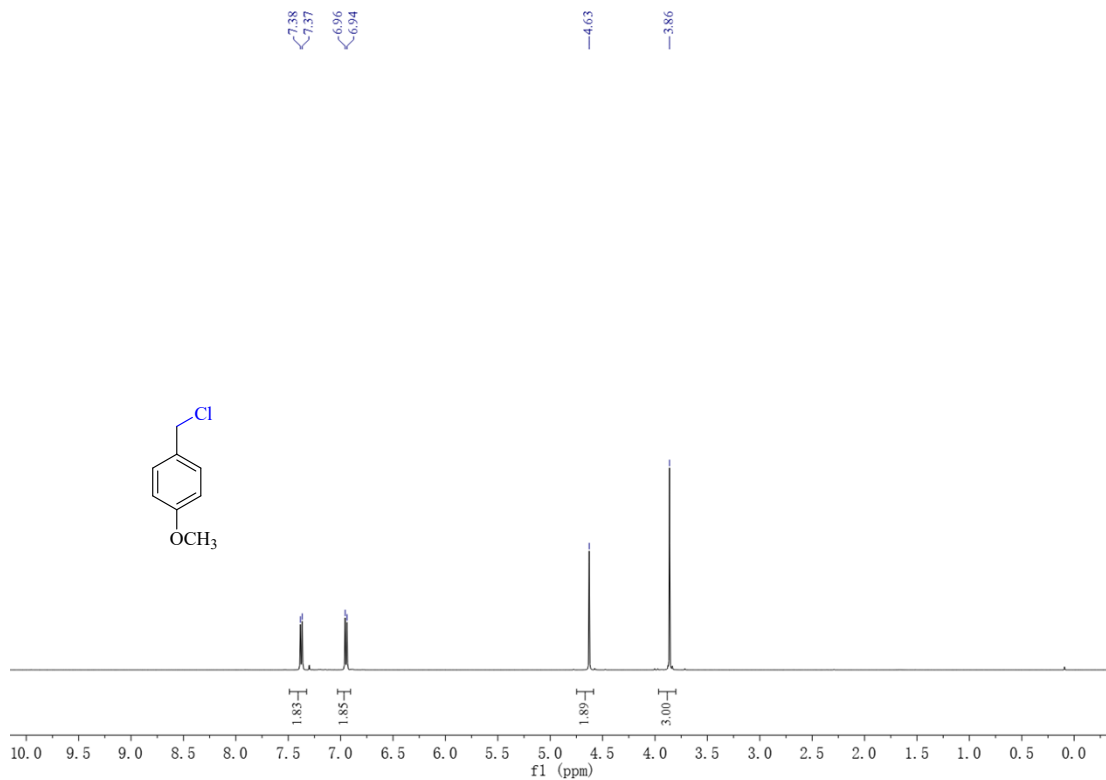

### <sup>13</sup>CNMR of 4-Methoxybenzyl chloride (2f)

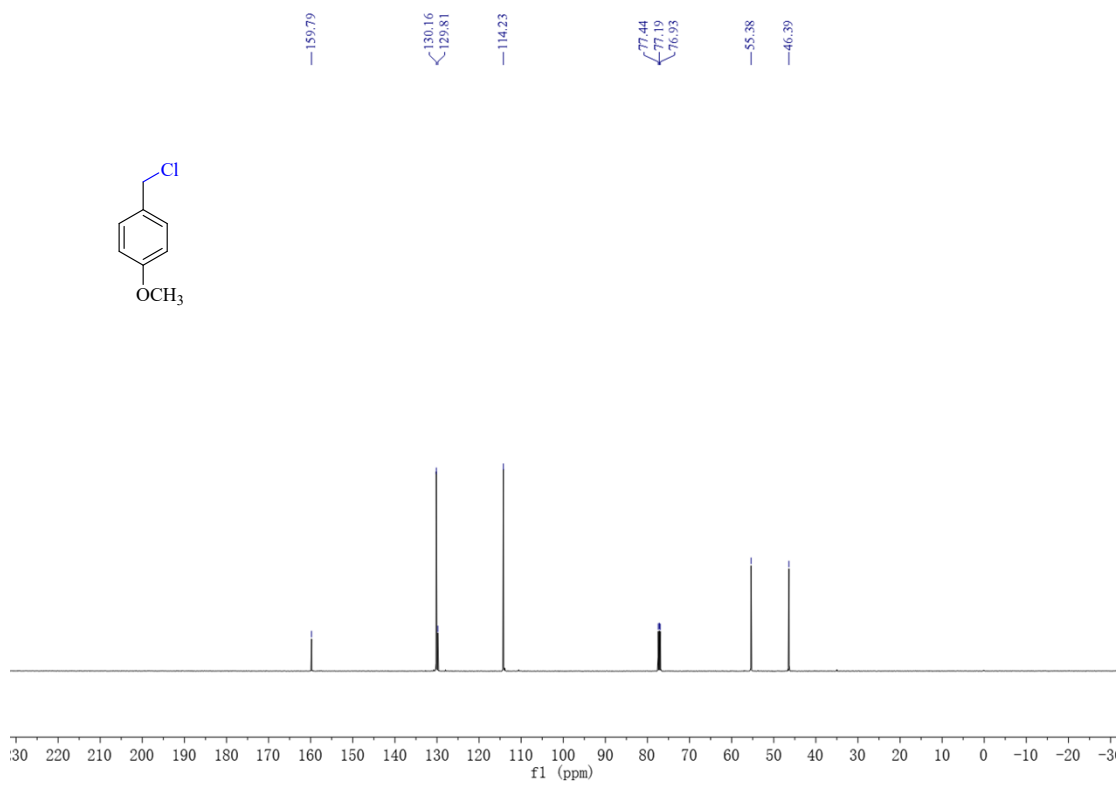

# GS-MS of Chlorination of 4-OMe-toluene reaction solution

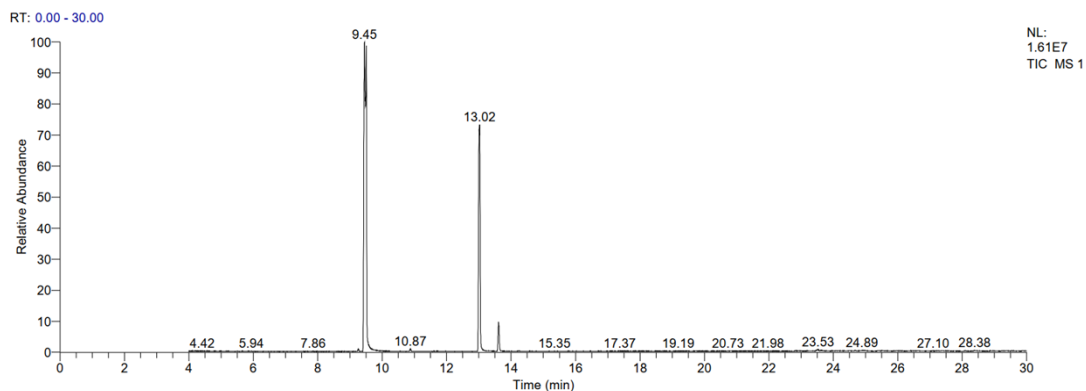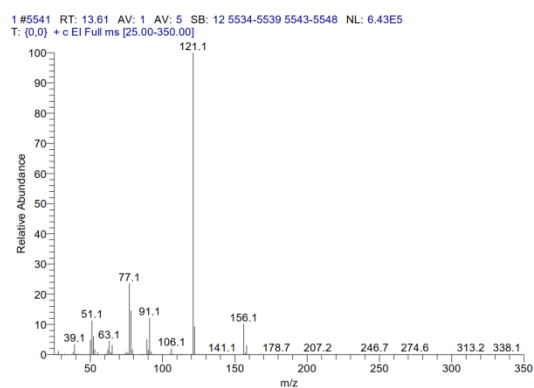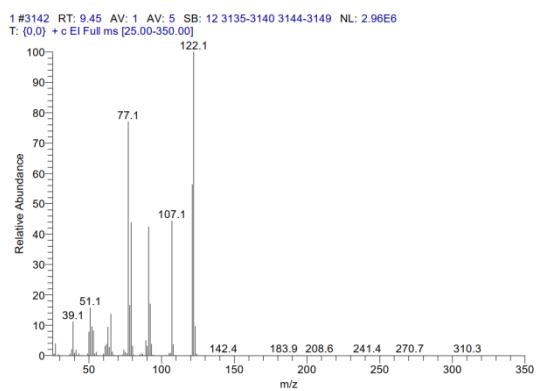

## Chlorination of *o*-NO<sub>2</sub>-toluene

### <sup>1</sup>HNMR of 2-Nitrobenzyl chloride (2g)

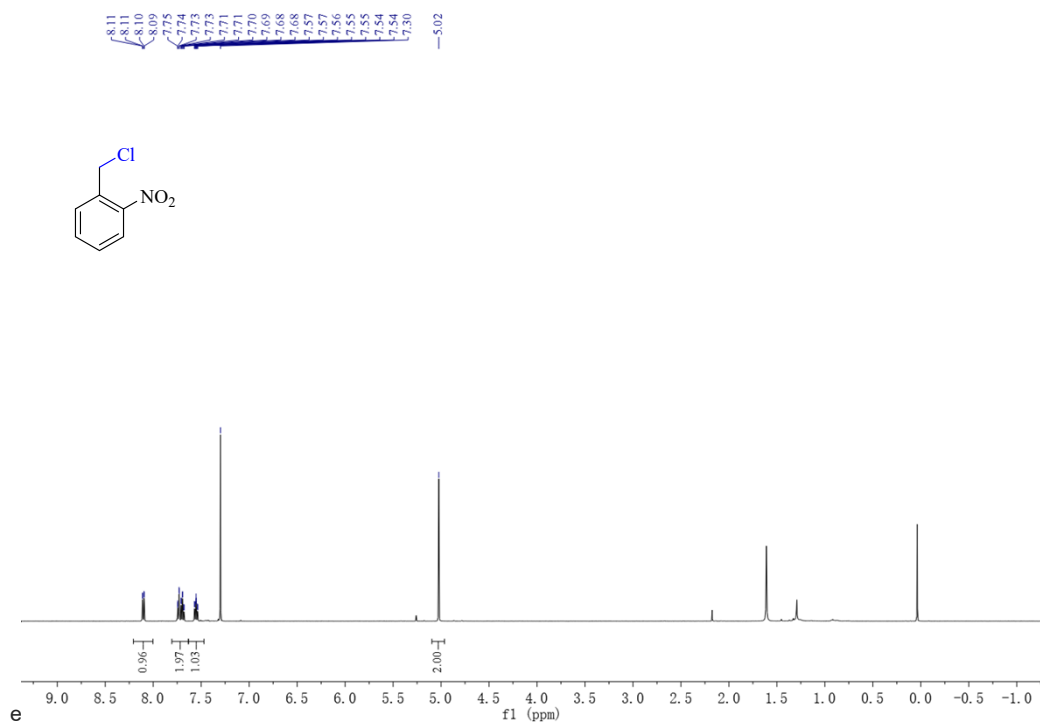

### <sup>13</sup>CNMR of 2-Nitrobenzyl chloride (2g)

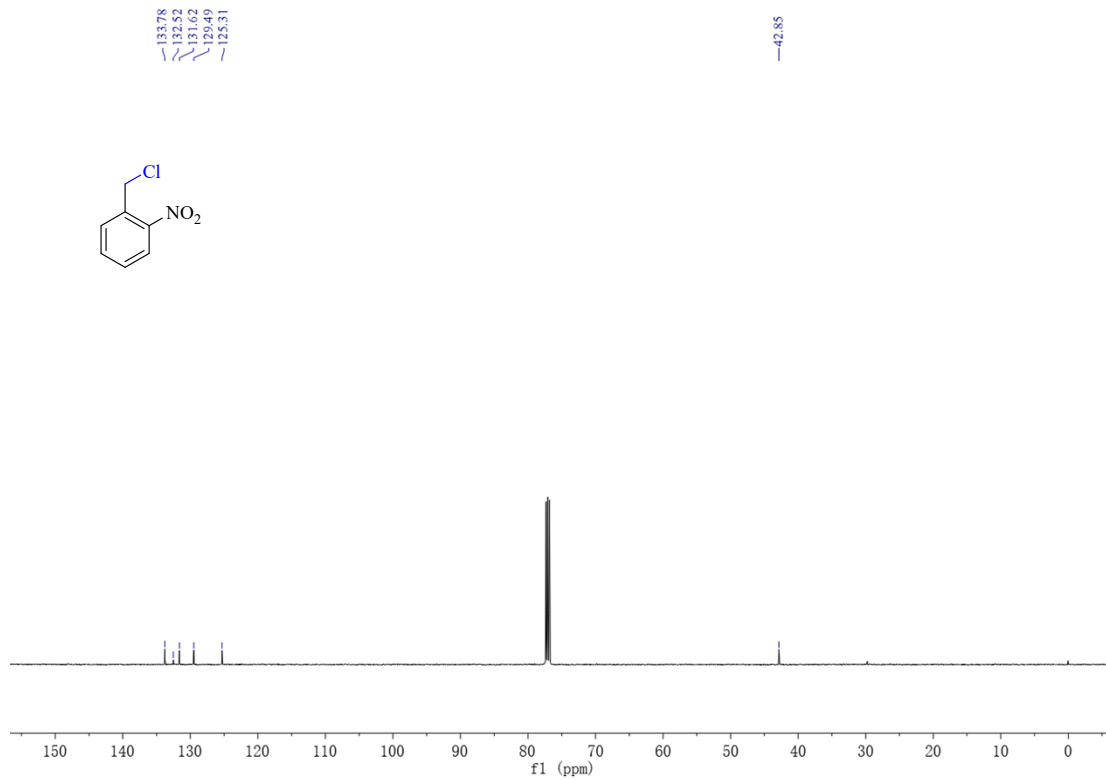

# GS-MS of Chlorination of *o*-NO<sub>2</sub>-toluene reaction solution

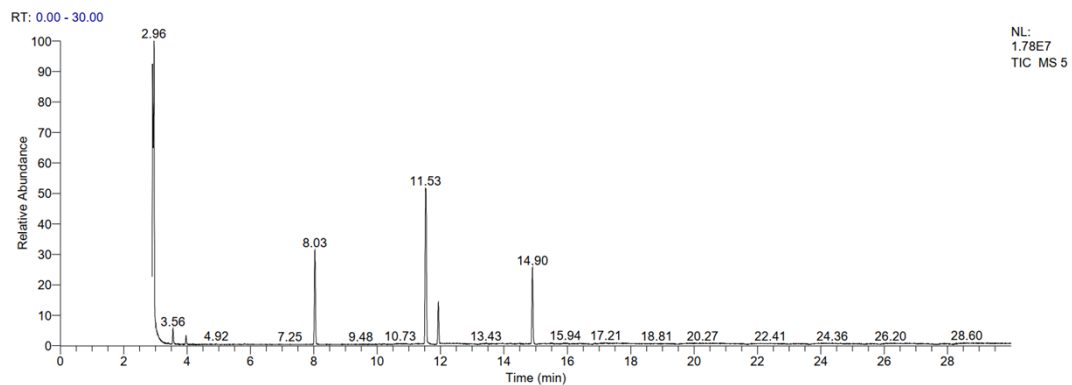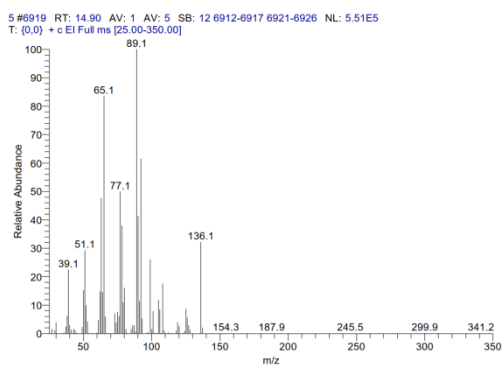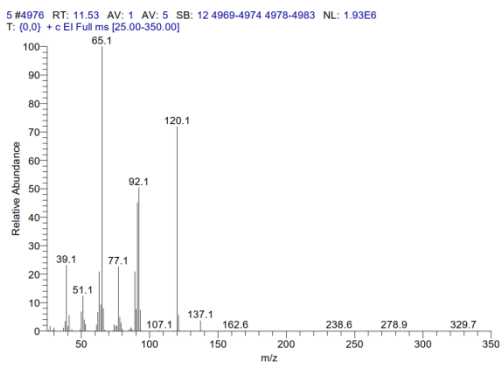

## Chlorination of *m*-NO<sub>2</sub>-toluene

### <sup>1</sup>H NMR of 3-Nitrobenzyl chloride (2h)

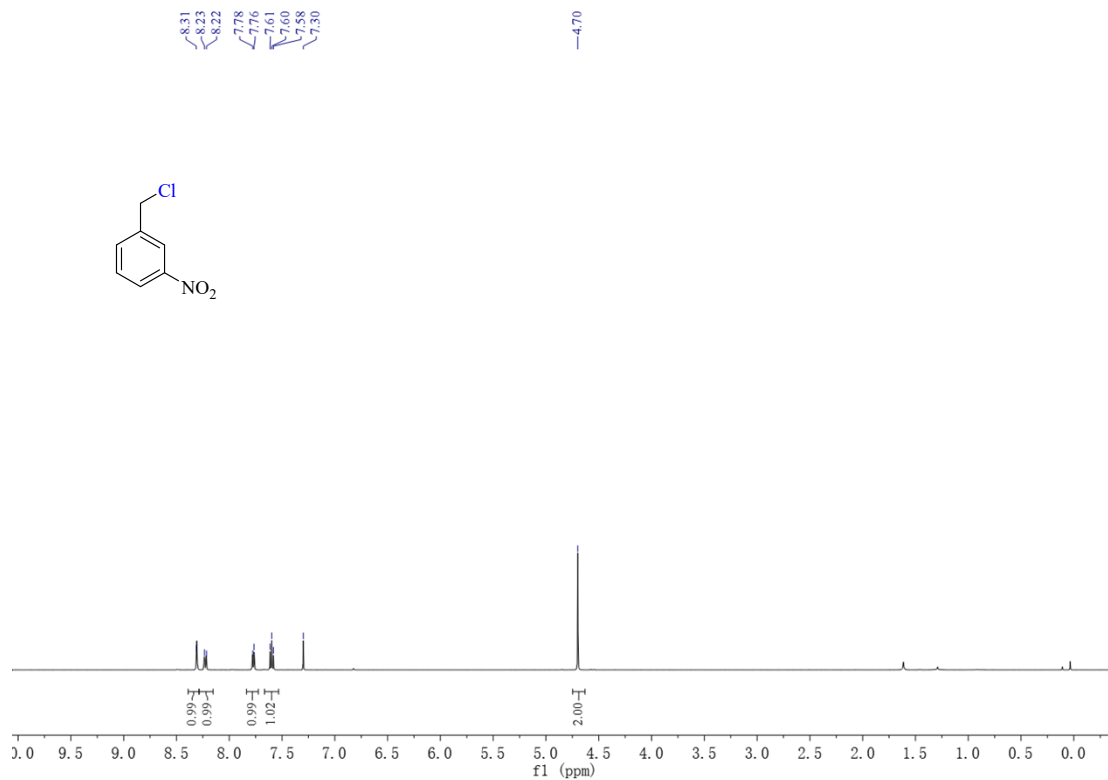

### <sup>13</sup>C NMR of 3-Nitrobenzyl chloride (2h)

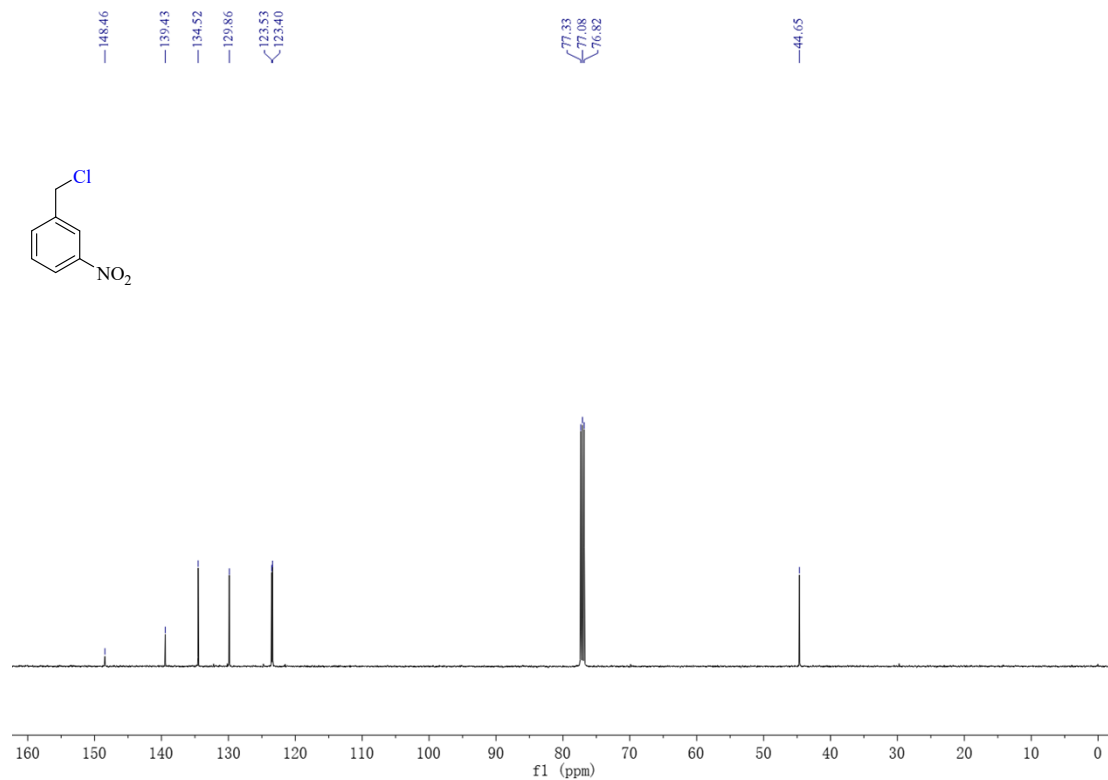



# GS-MS of Chlorination of *m*-NO<sub>2</sub>-toluene reaction solution

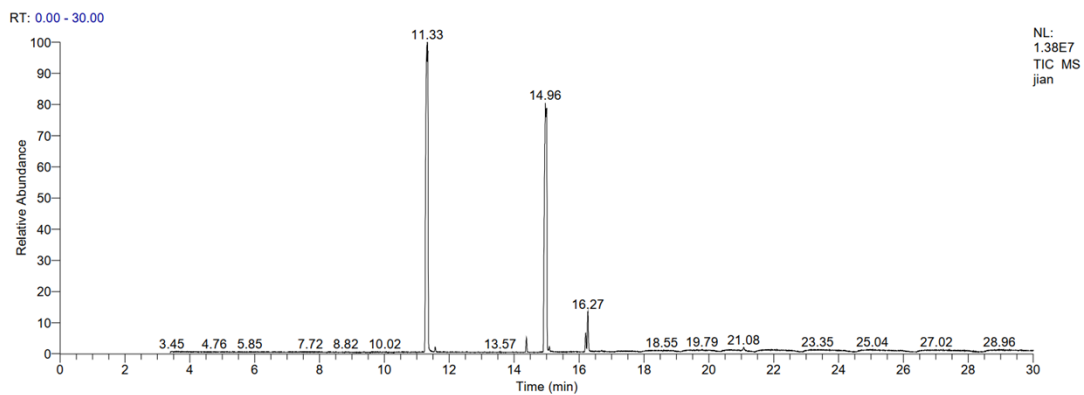

jian #6664 RT: 14.96 AV: 1 AV: 5 SB: 12 6657-6662 6666-6671 NL: 2.53E6  
T: (0,0) + c EI Full ms [25.00-350.00]

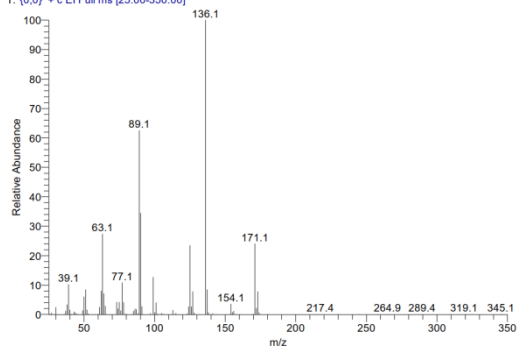

jian #4570 RT: 11.33 AV: 1 AV: 5 SB: 12 4563-4568 4572-4577 NL: 3.82E6  
T: (0,0) + c EI Full ms [25.00-350.00]

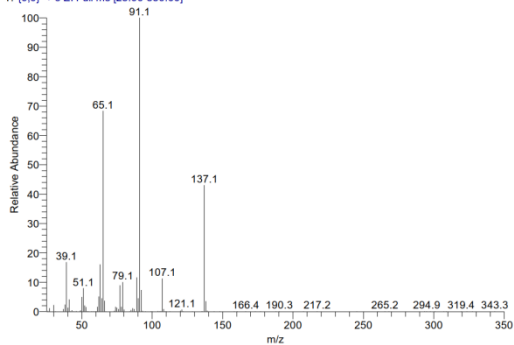

## Chlorination of *p*-NO<sub>2</sub>-toluene

### <sup>1</sup>HNMR of 3-Nitrobenzyl chloride (2i)

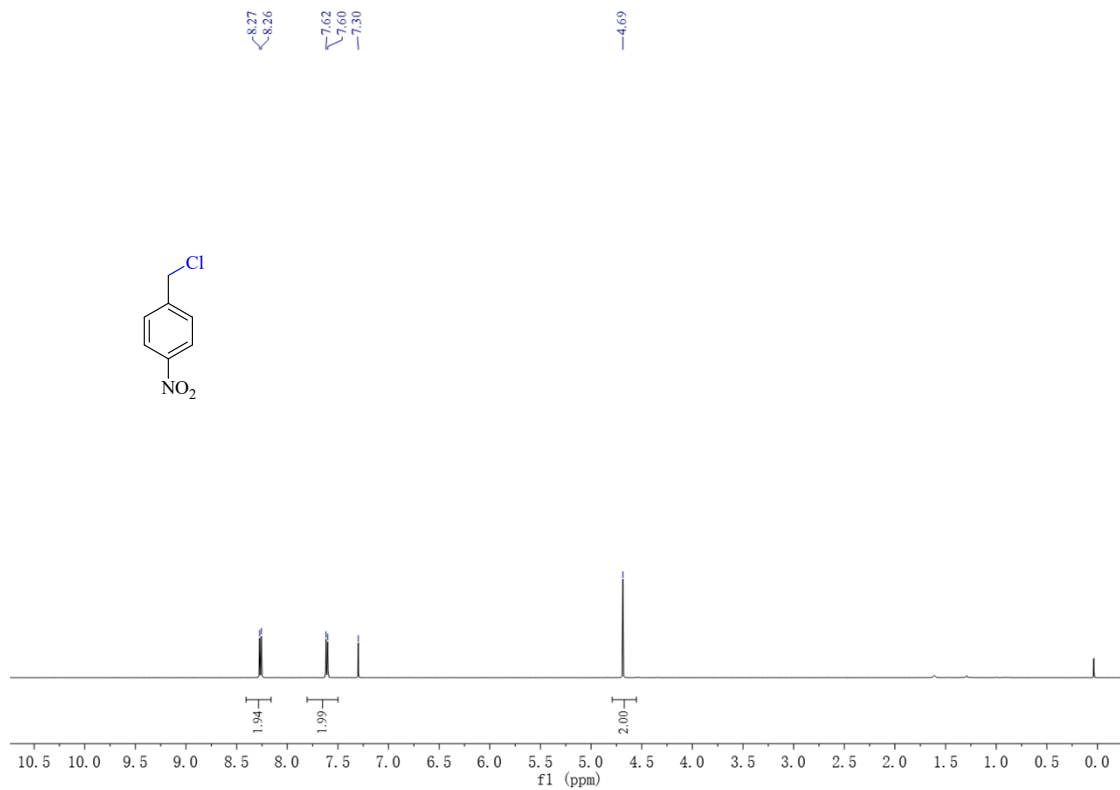

### <sup>13</sup>CNMR of 3-Nitrobenzyl chloride (2i)

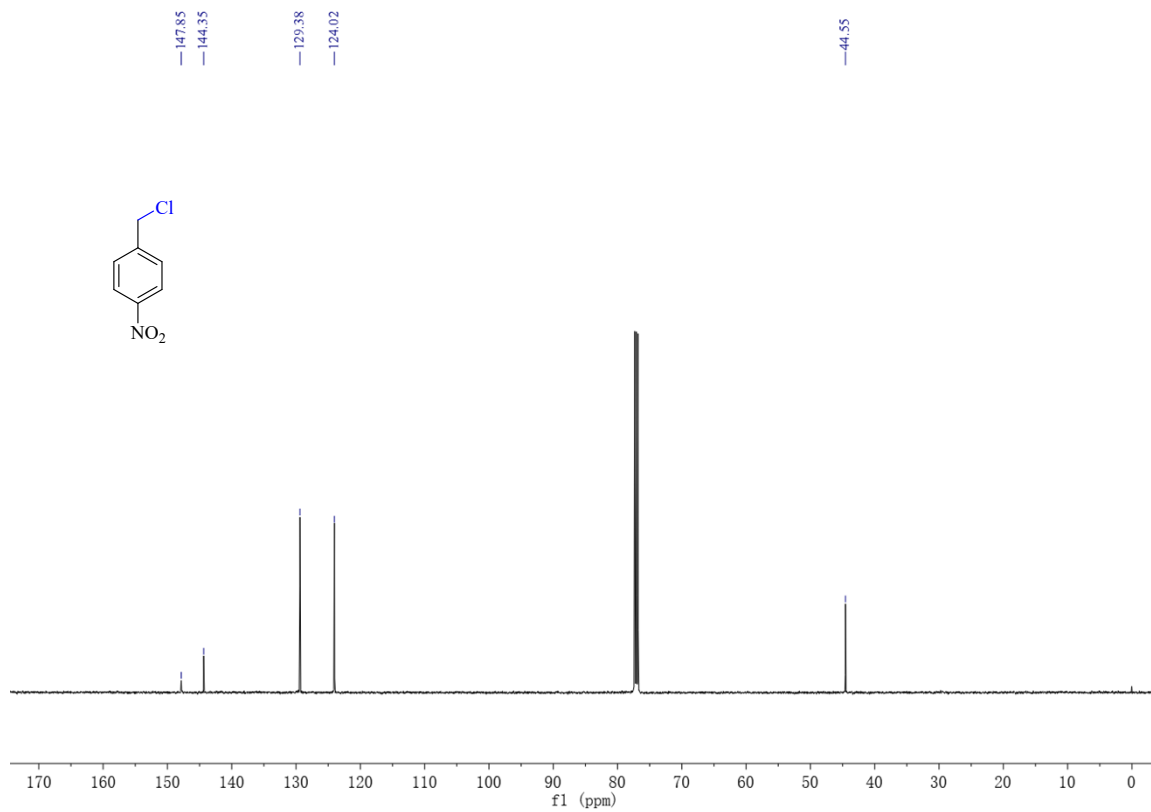

# GS-MS of Chlorination of *p*-NO<sub>2</sub>-toluene reaction solution

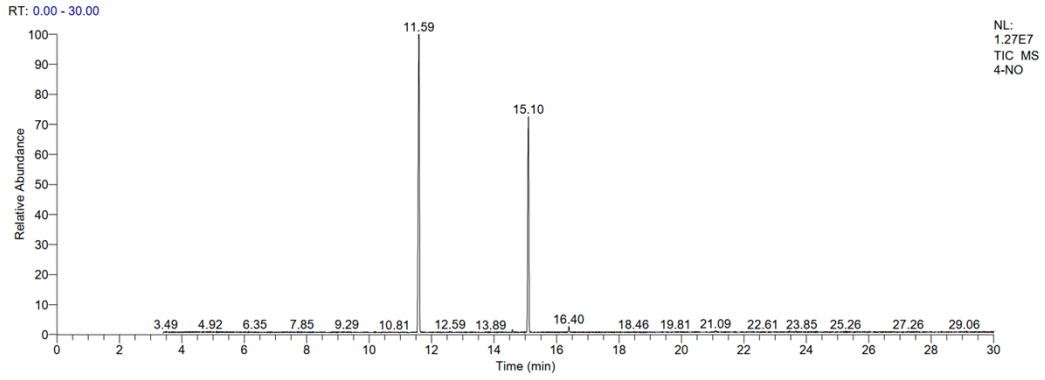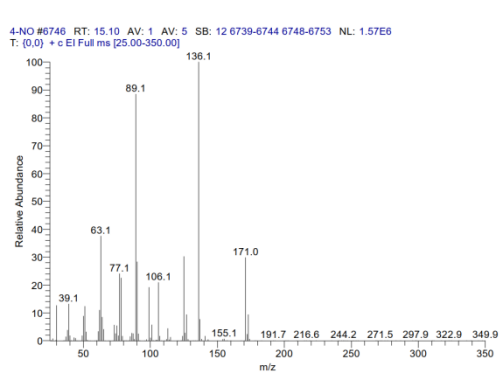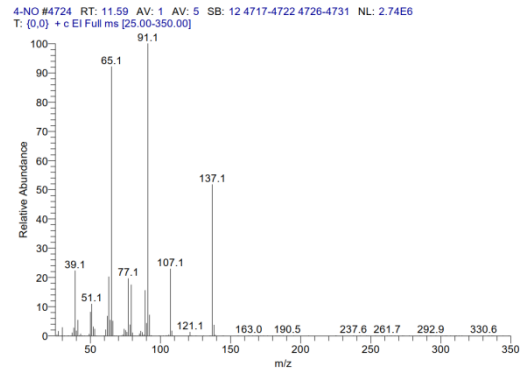

## Chlorination of *o*-Xylene

### <sup>1</sup>H NMR of 2-Methylbenzyl chloride(2j)

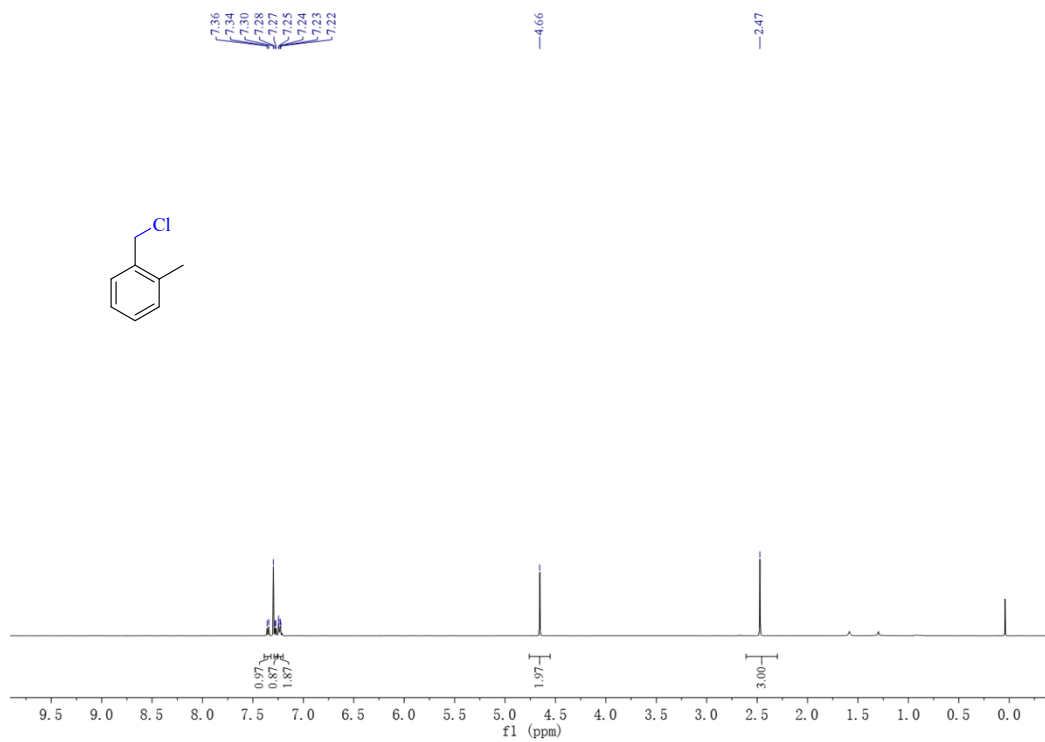

### <sup>13</sup>CNMR of <sup>1</sup>H NMR of 2-Methylbenzyl chloride(2j)

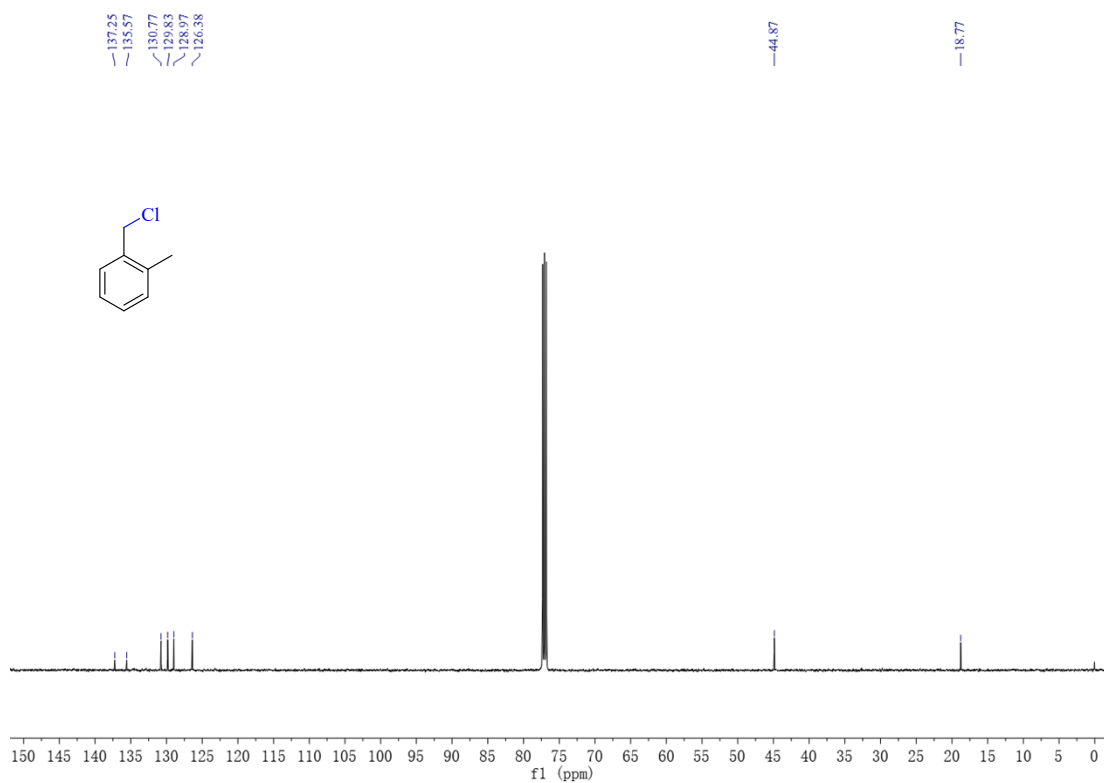

# GS-MS of Chlorination of *o*-Xylene reaction solution

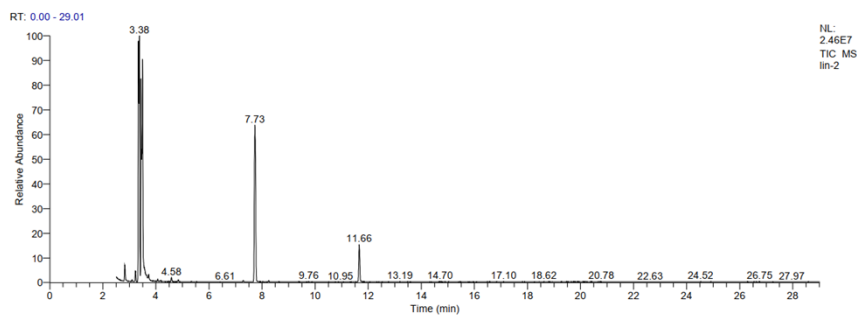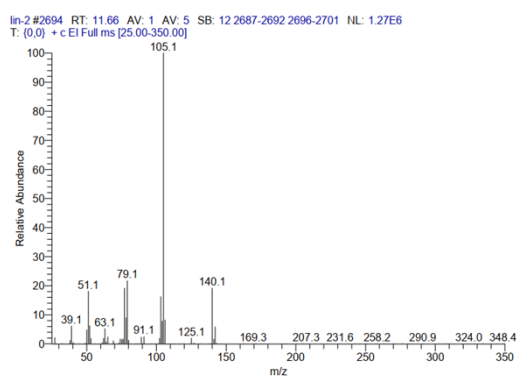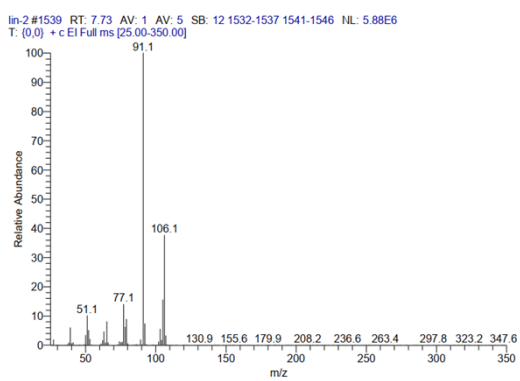

## Chlorination of *m*-Xylene

### <sup>1</sup>H NMR of 3-Methylbenzyl chloride (2k)

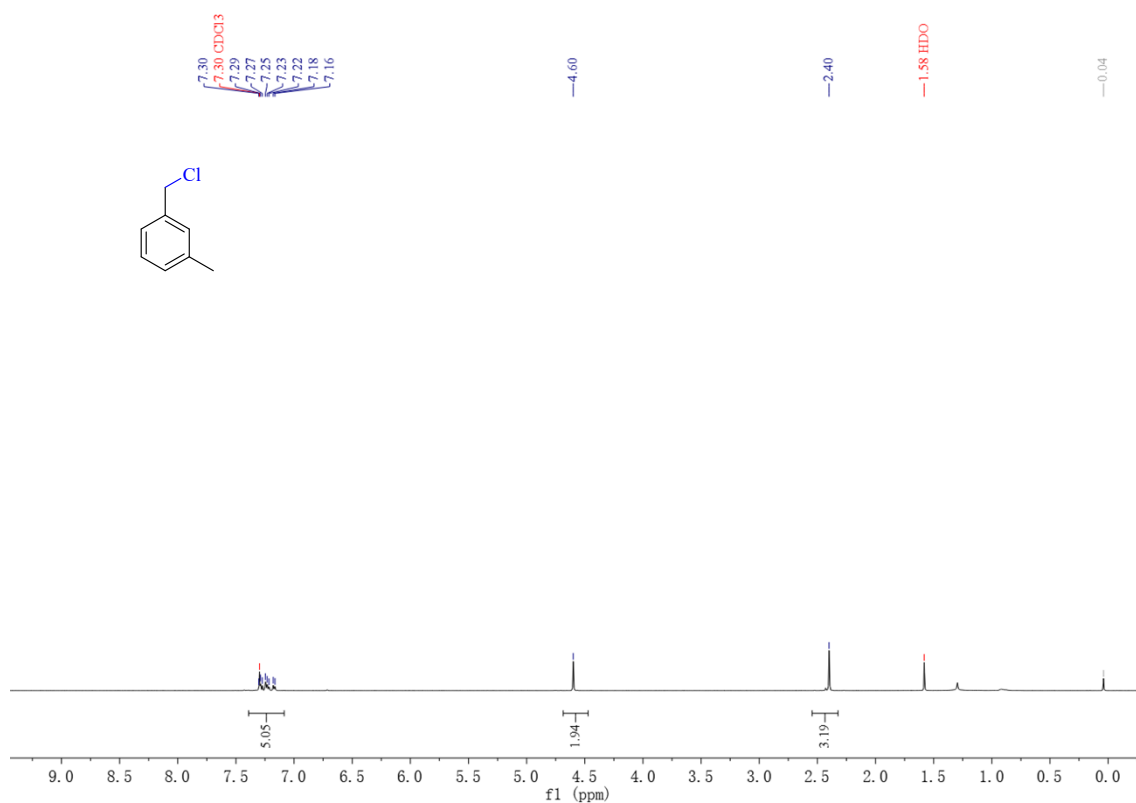

### <sup>13</sup>C NMR of 3-Methylbenzyl chloride (2k)

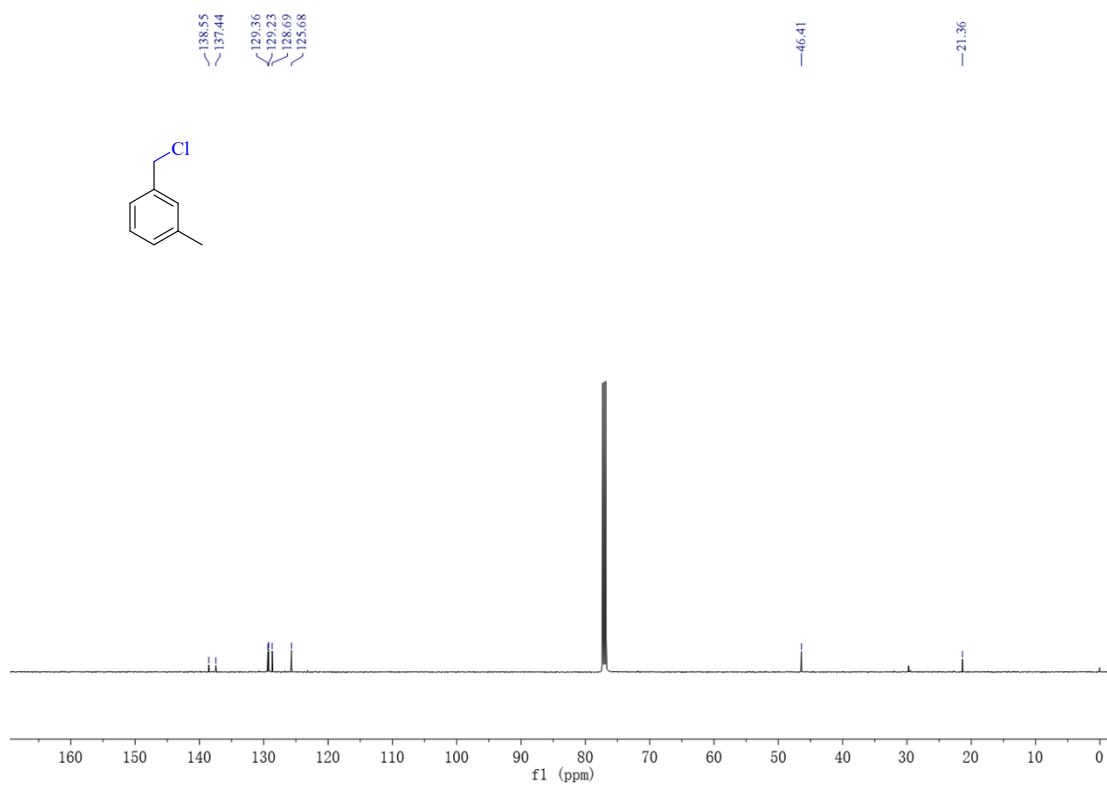

# GS-MS of Chlorination of *m*-Xylene reaction solution

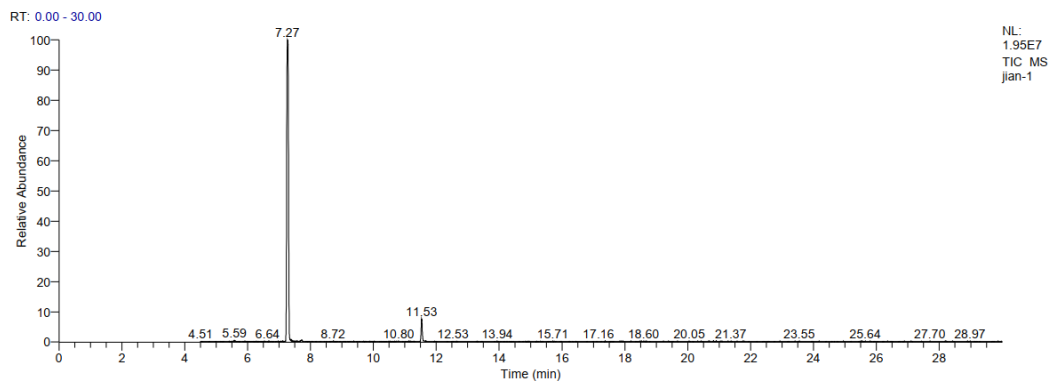

jan-1 #4056 RT: 11.53 AV: 1 AV: 5 SB: 12 4049-4054 4058-4063 NL: 5.33E5  
T: (0,0) + c EI Full ms [25.00-350.00]

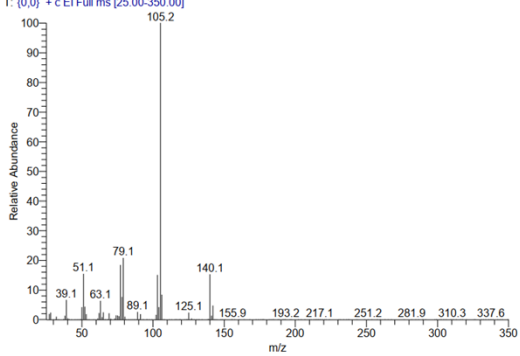

jan-1 #1599 RT: 7.27 AV: 1 AV: 5 SB: 12 1592-1597 1601-1606 NL: 7.31E6  
T: (0,0) + c EI Full ms [25.00-350.00]

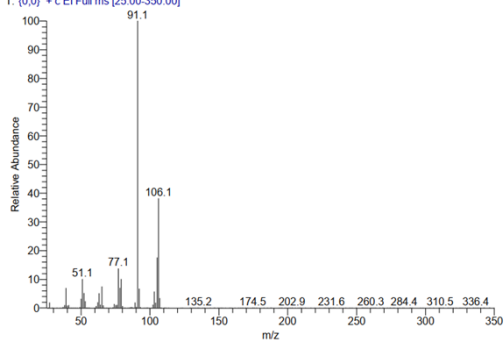

## Chlorination of *p*-Xylene

### <sup>1</sup>H NMR of 4-Methylbenzyl chloride (2I)

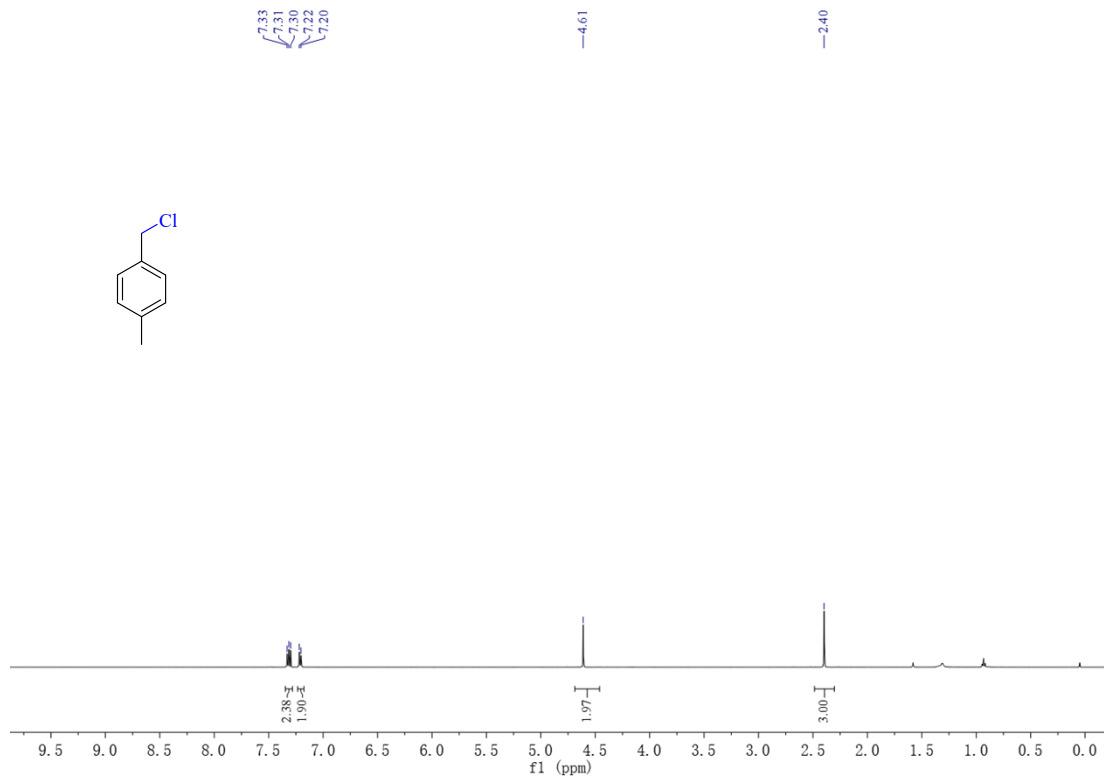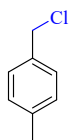

### <sup>13</sup>C NMR of 4-Methylbenzyl chloride(2I)

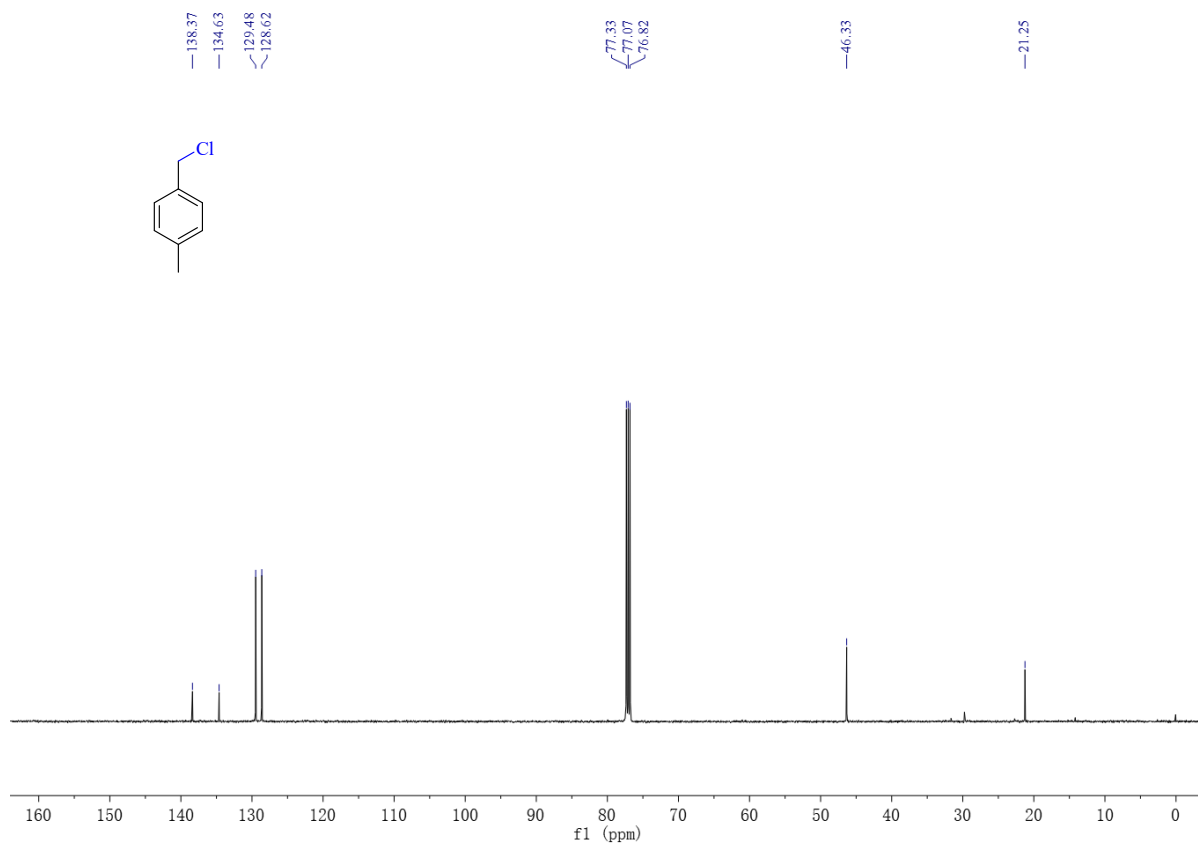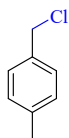



# GS-MS of Chlorination of *p*-Xylene reaction solution

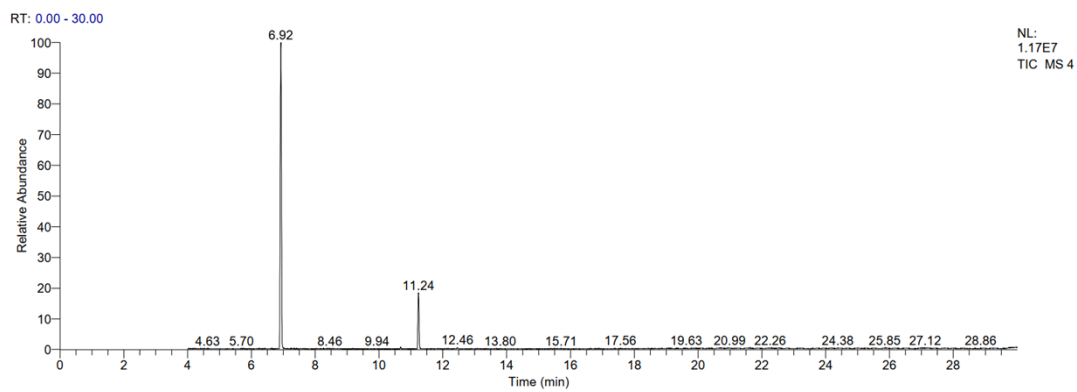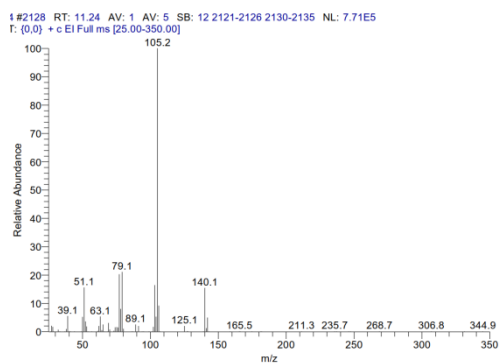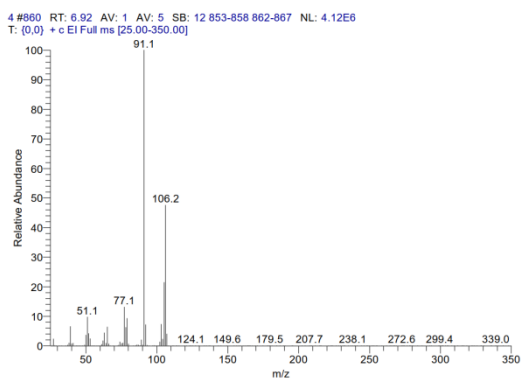

## Chlorination of 4,4'-dimethyl-1,1'-biphenyl

### <sup>1</sup>H NMR of 4-Chloromethyl-4'-methylbiphenyl (2m)

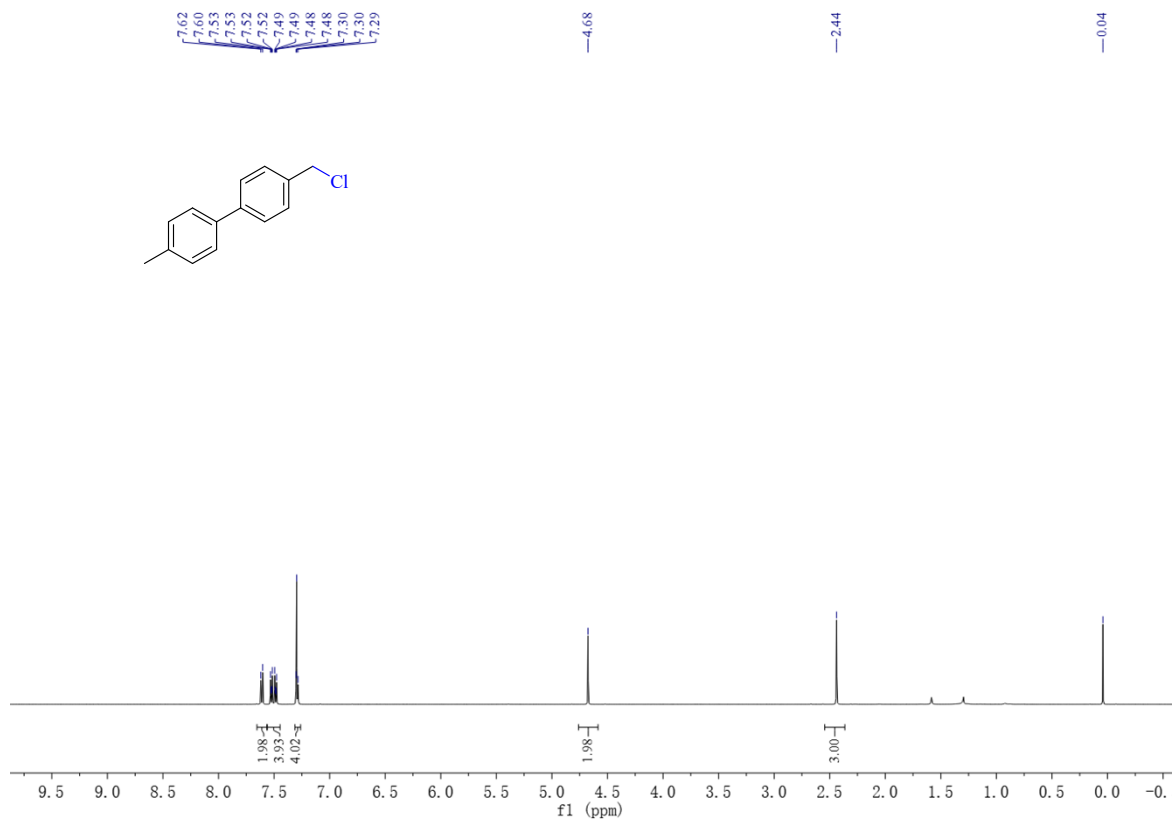

### <sup>13</sup>CNMR of 4-Chloromethyl-4'-methylbiphenyl (2m)

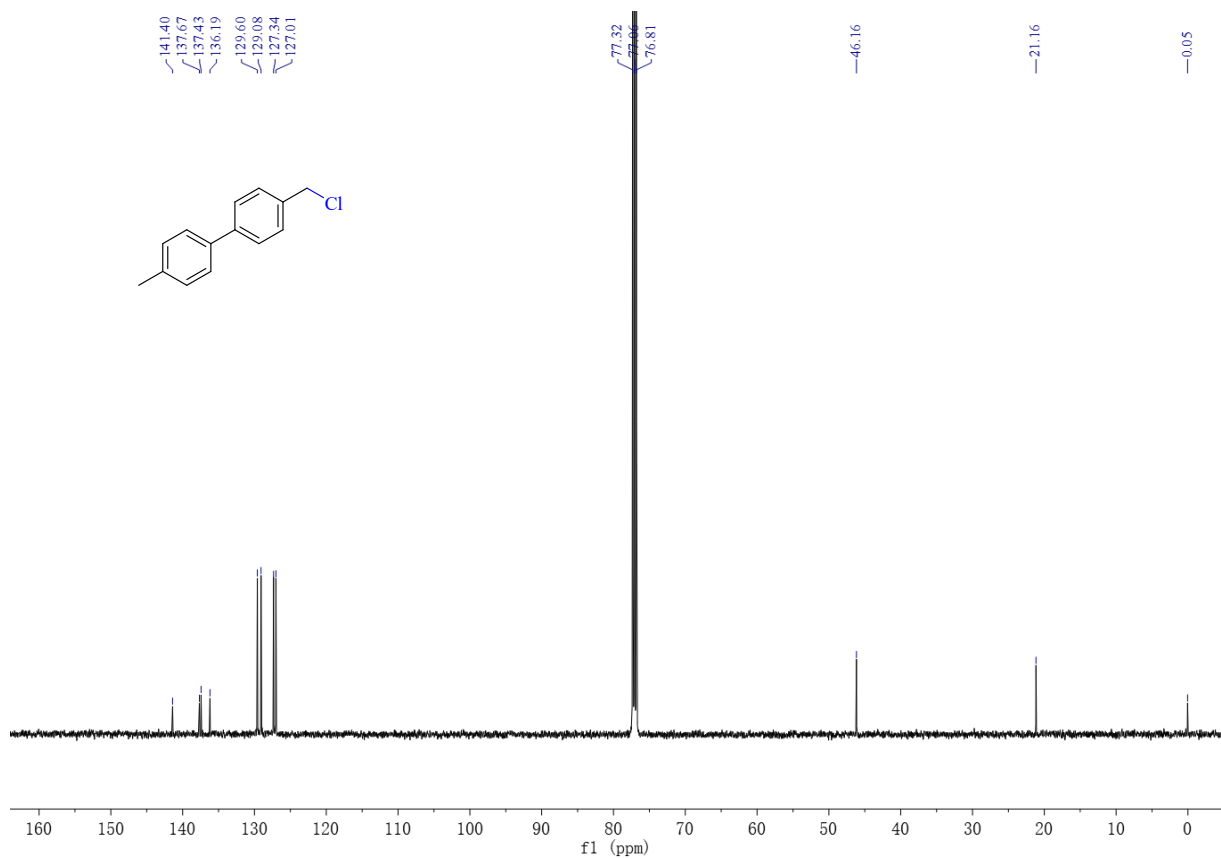

# GS-MS of Chlorination of 4,4'-dimethyl-1,1'-biphenyl reaction solution

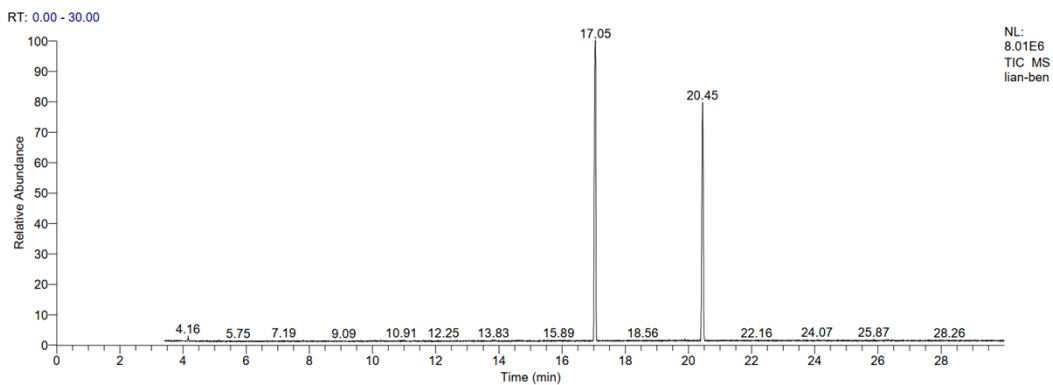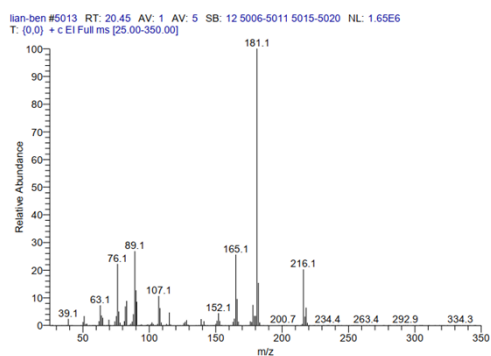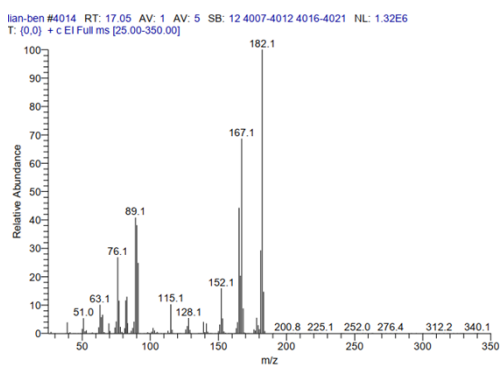

## Chlorination of ethylbenzene

### <sup>1</sup>H NMR of (2-chloroethyl)benzene (2n)

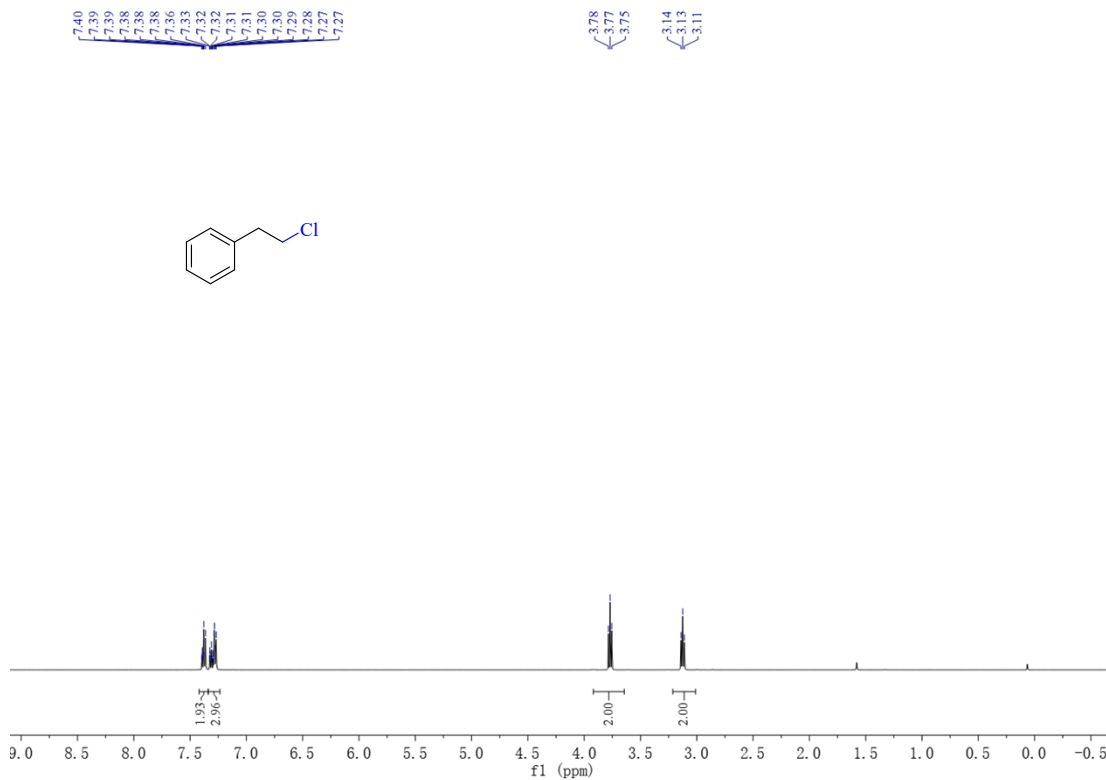

### <sup>13</sup>C NMR of (2-chloroethyl)benzene (2n)

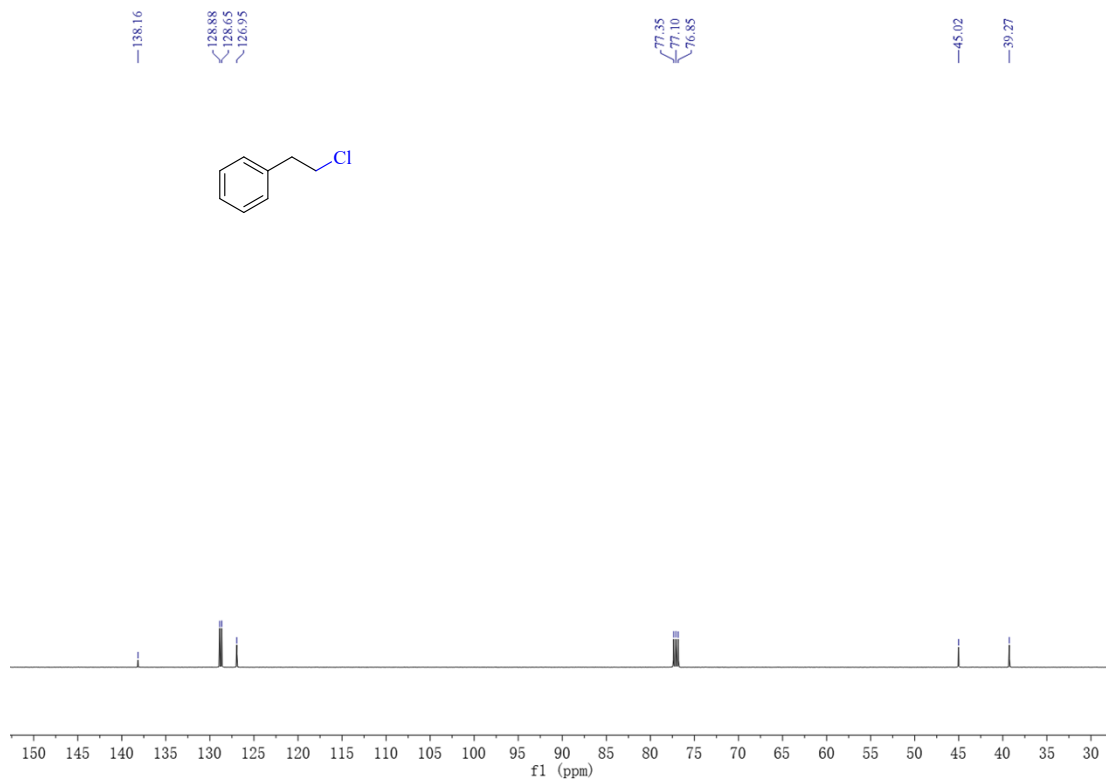

# GS-MS of Chlorination of ethylbenzene reaction solution

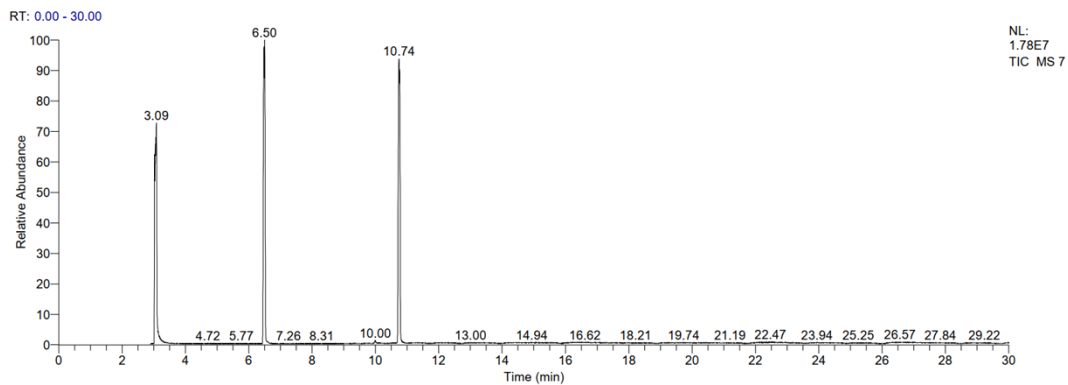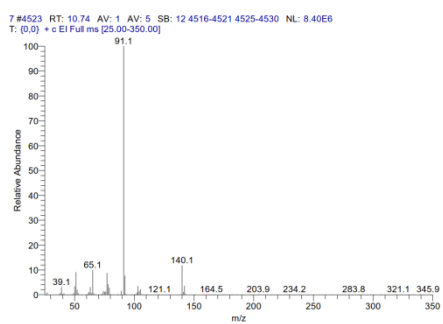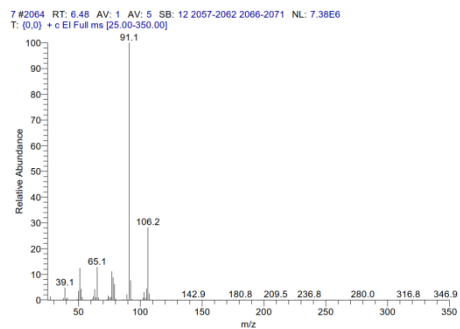

## Chlorination of ethylbenzene

### $^1\text{H}$ NMR of (1-chloroethyl)benzene (2o)

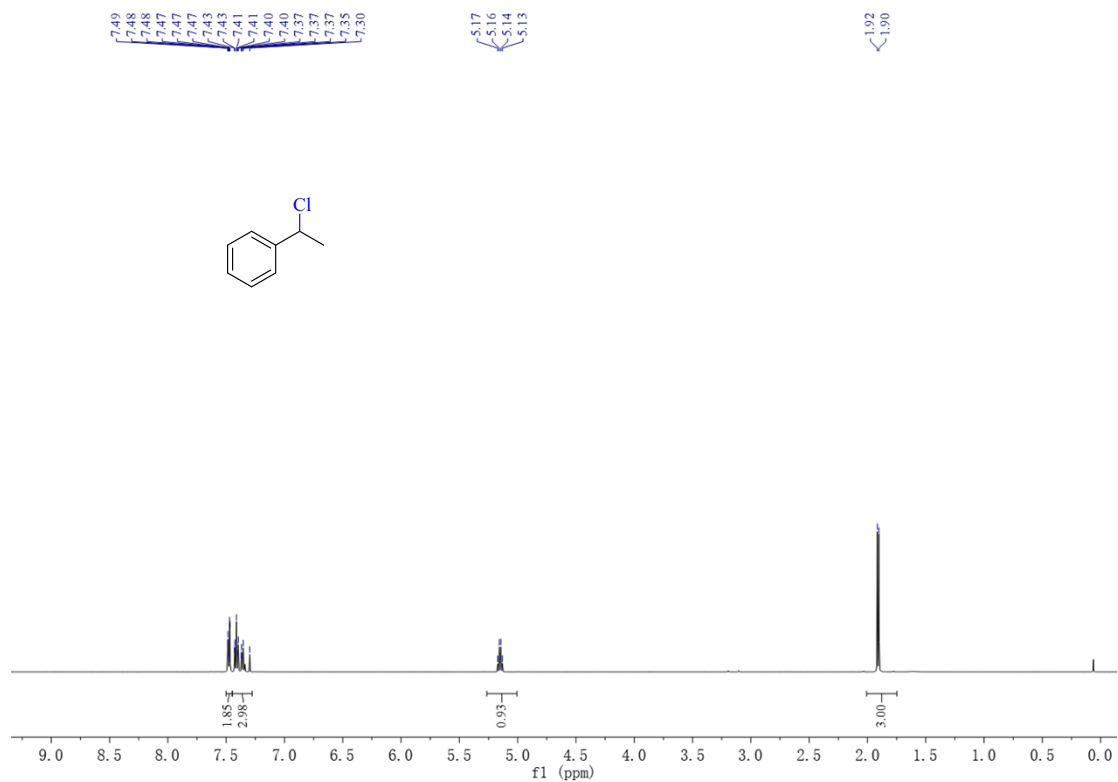

### $^{13}\text{C}$ NMR of (1-chloroethyl)benzene (2o)

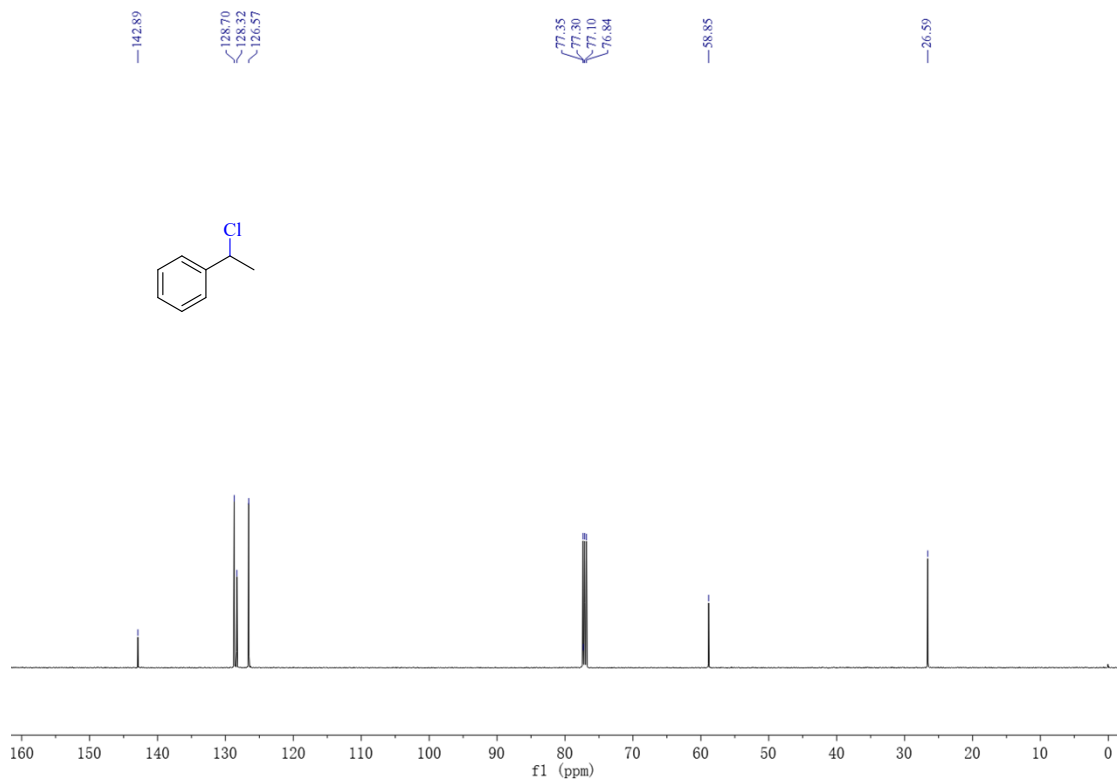

# GS-MS of Chlorination of reaction solution

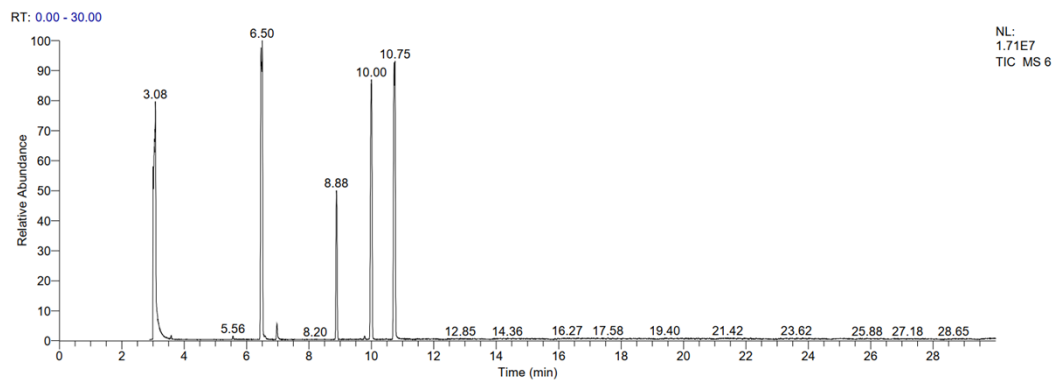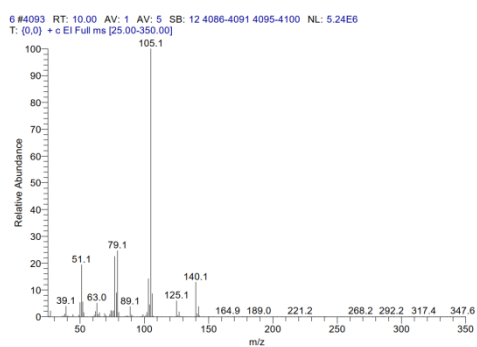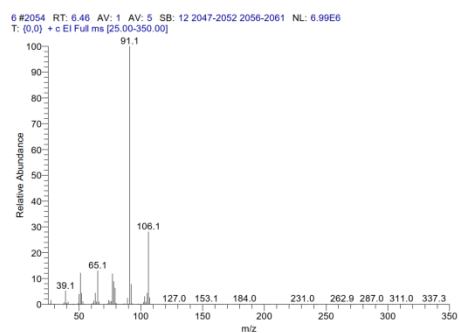

## Chlorination of isopropylbenzene

### $^1\text{H}$ NMR of (2-chloro-1-methylethyl)benzene (2p)

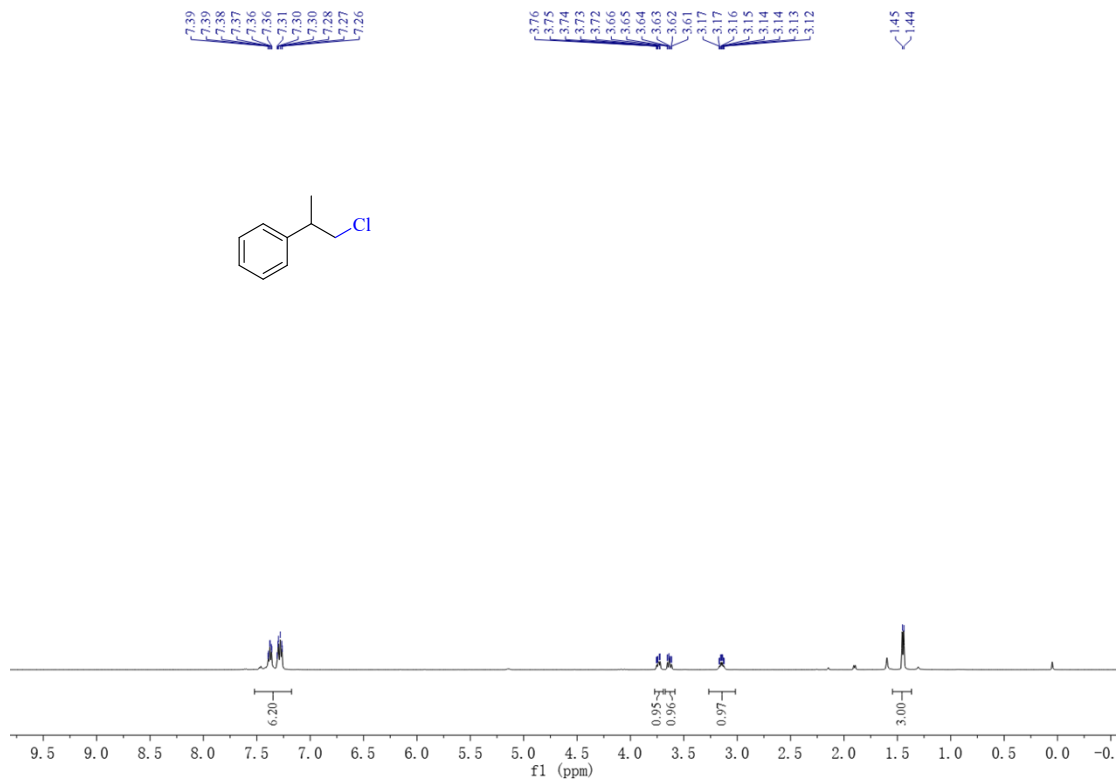

### $^{13}\text{C}$ NMR of (2-chloro-1-methylethyl)benzene (2p)

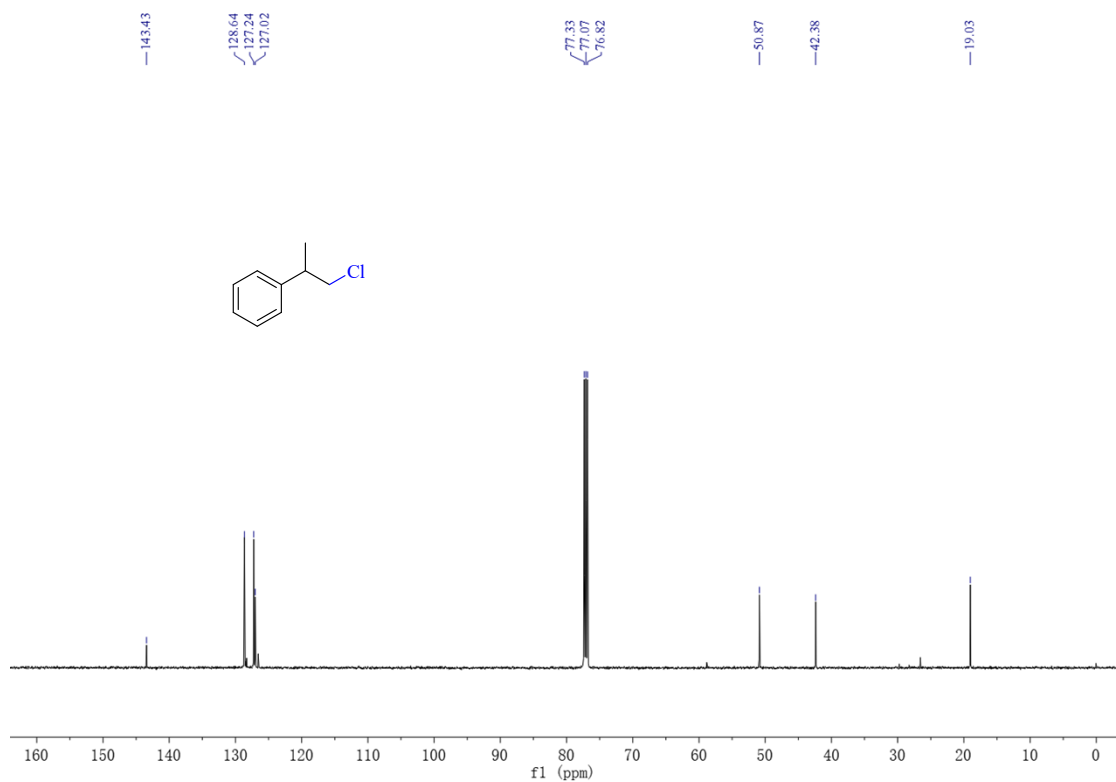



# GS-MS of Chlorination of isopropylbenzene reaction solution

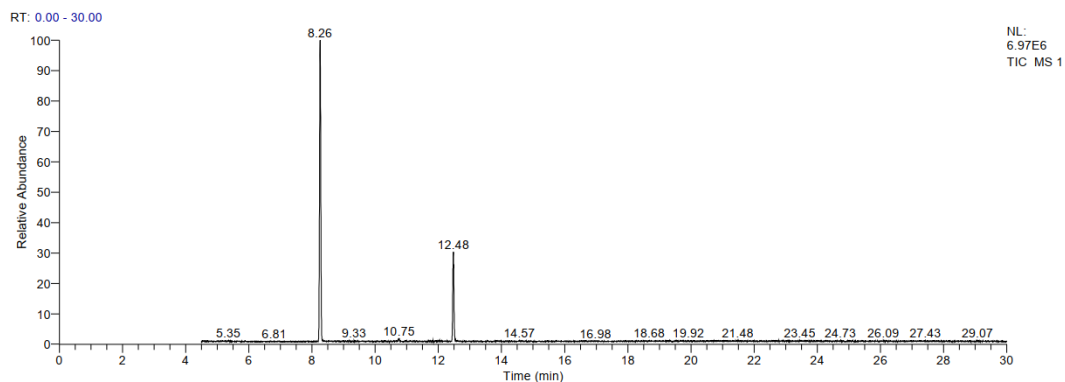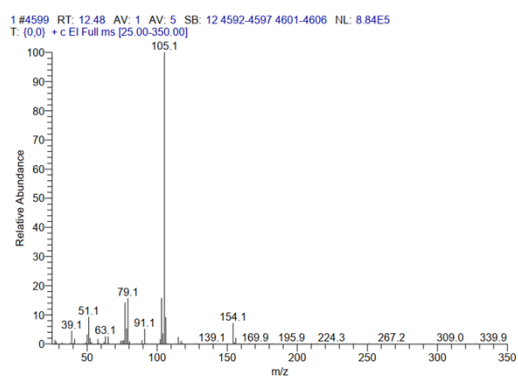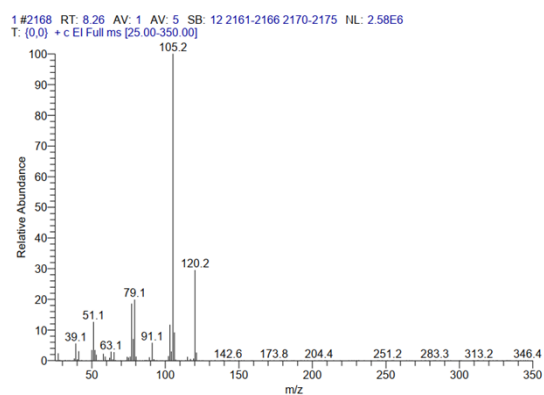

## Chlorination of 1-methylnaphthalene

### <sup>1</sup>HNMR of 1-(chloromethyl)naphthalene (2r)

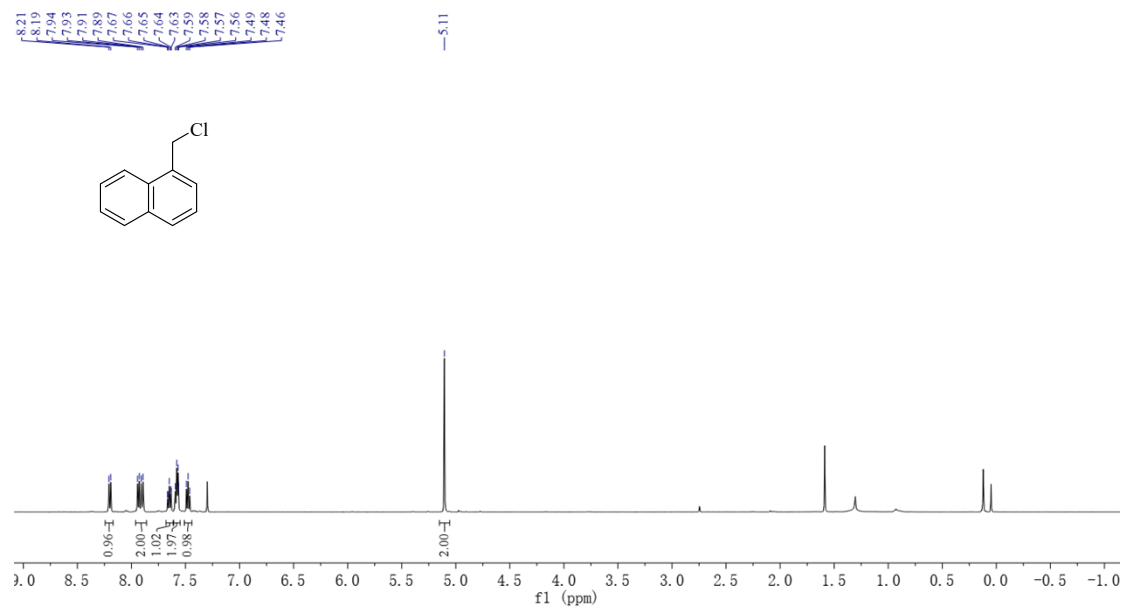

### <sup>13</sup>CNMR of 1-(chloromethyl)naphthalene (2r)

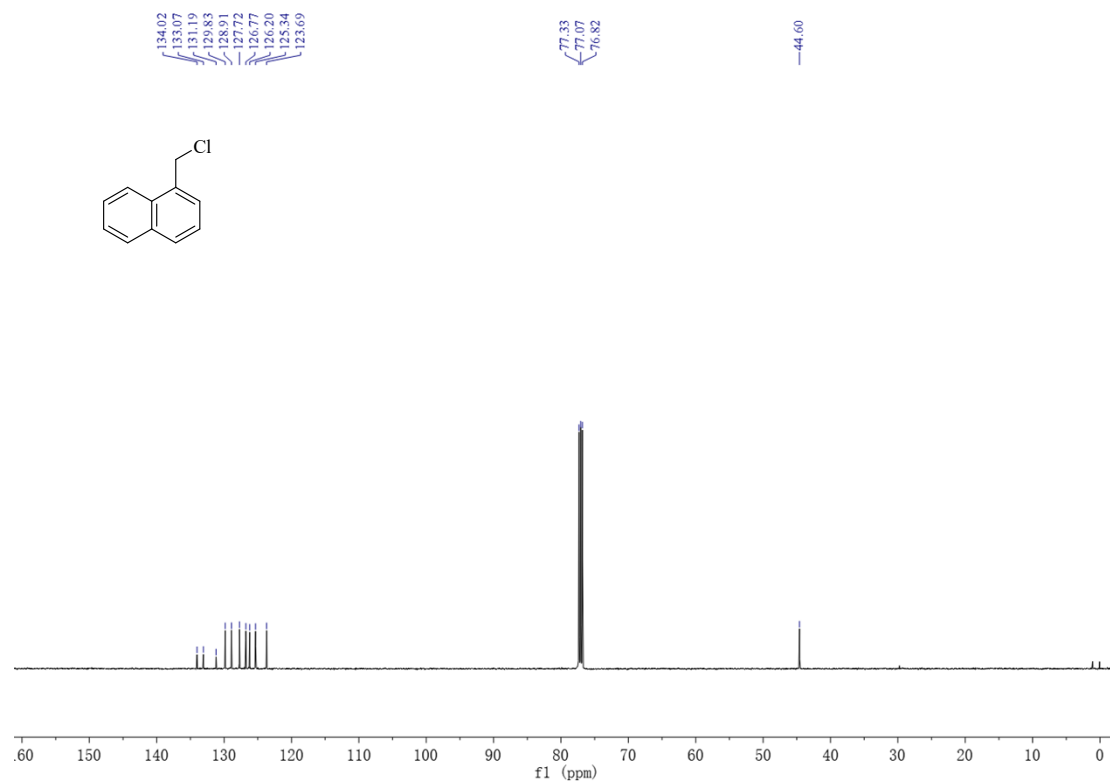

# GS-MS of Chlorination of 1-methylnaphthalene reaction solution

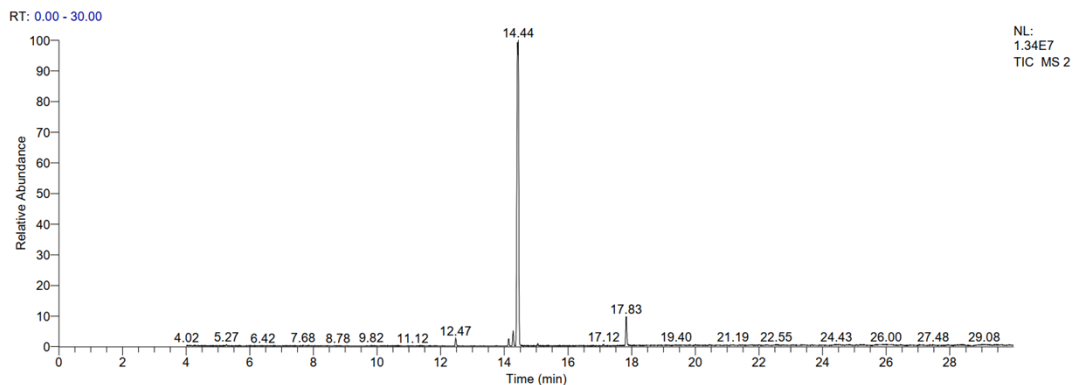

2 #4066 RT: 17.83 AV: 1 AV: 5 SB: 12 4059-4064 4068-4073 NL: 3.96E5  
T: (0,0) + c EI Full ms [25.00-350.00]

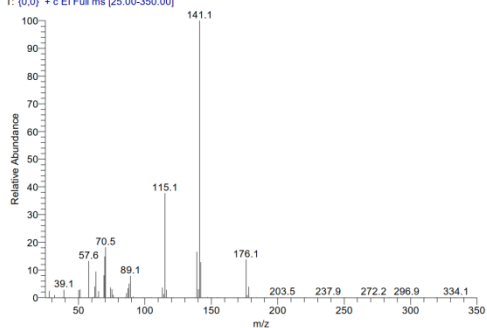

2 #3069 RT: 14.44 AV: 1 AV: 5 SB: 12 3062-3067 3071-3076 NL: 3.23E6  
T: (0,0) + c EI Full ms [25.00-350.00]

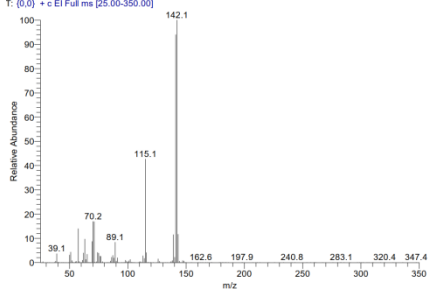

## Chlorination of 2-methylquinoline

### $^1\text{H}$ NMR of 2-(chloromethyl) quinoline (2s)

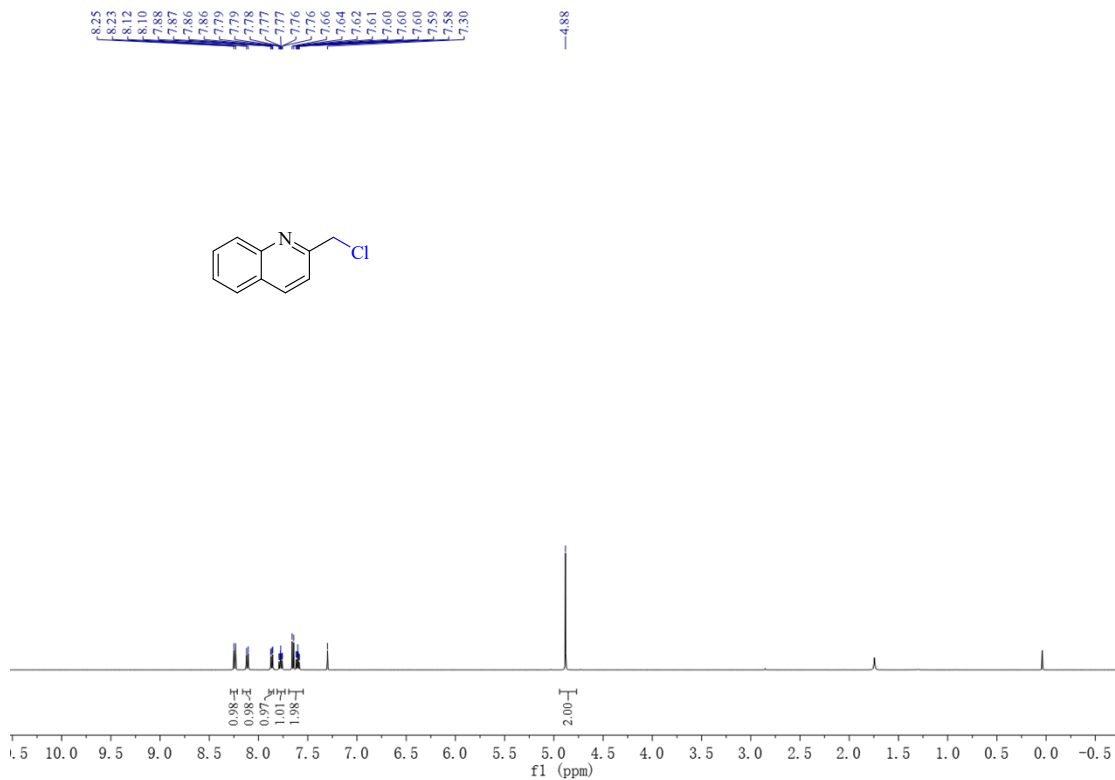

### $^{13}\text{C}$ NMR of 2-(chloromethyl) quinoline (2s)

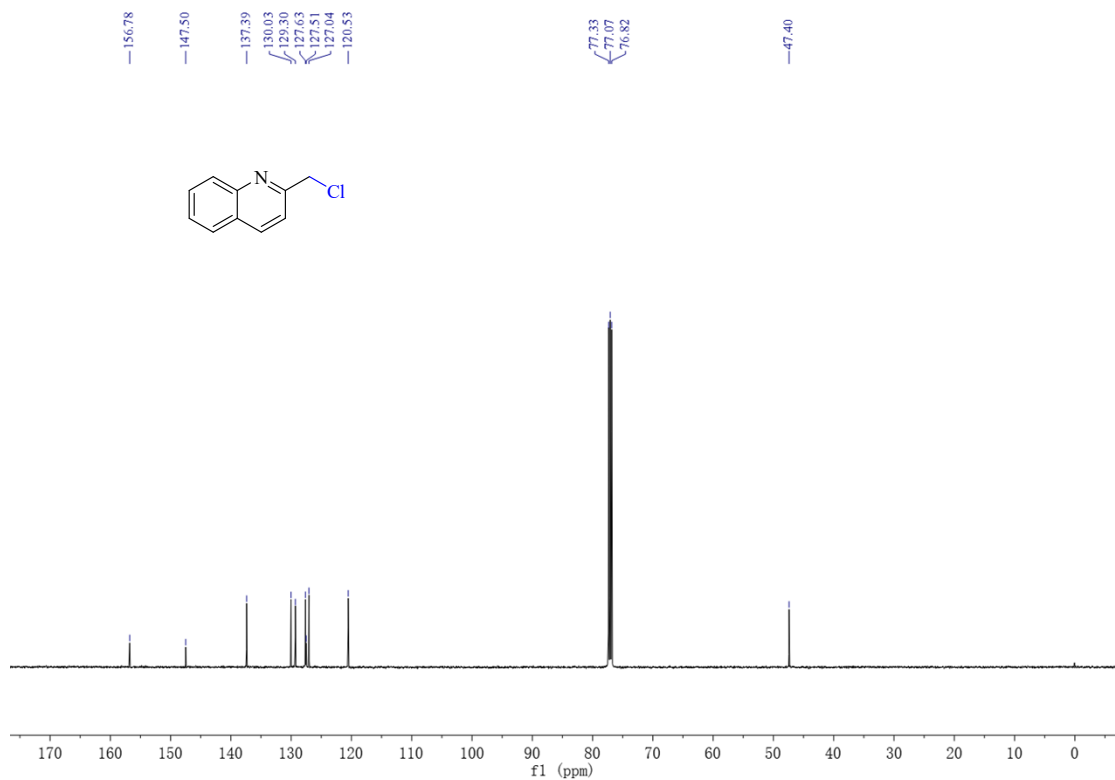

# GS-MS of chlorination of 2-methylquinoline reaction solution

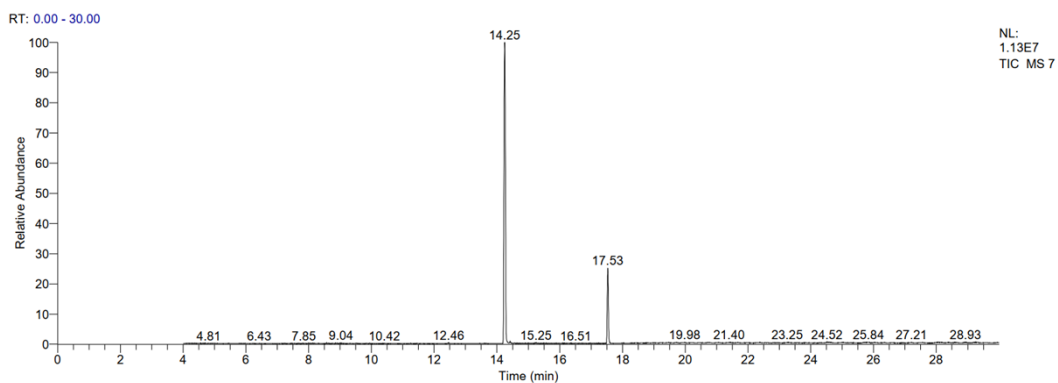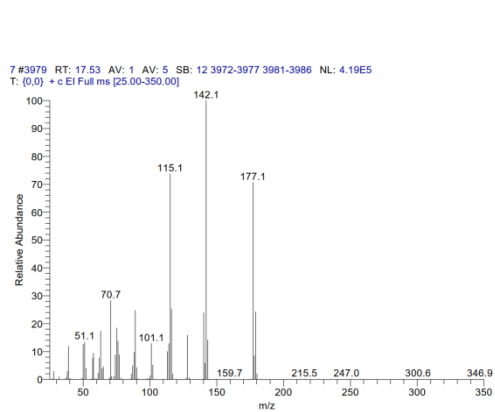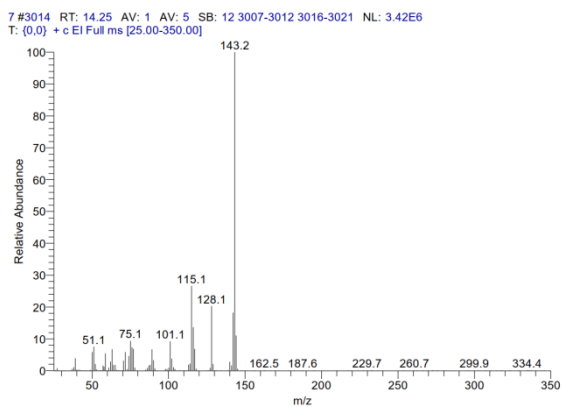

## Chlorination of 2-methylpyridine

### <sup>1</sup>HNMR of 2-(chloromethyl) pyridine (2t)

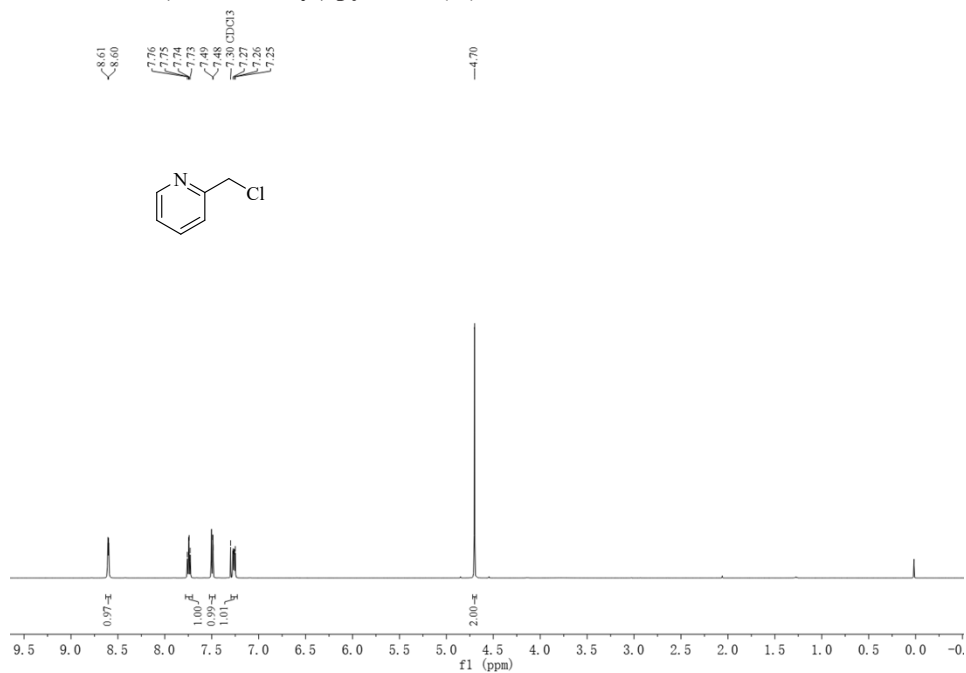

### <sup>13</sup>CNMR of 2-(chloromethyl) pyridine (2t)

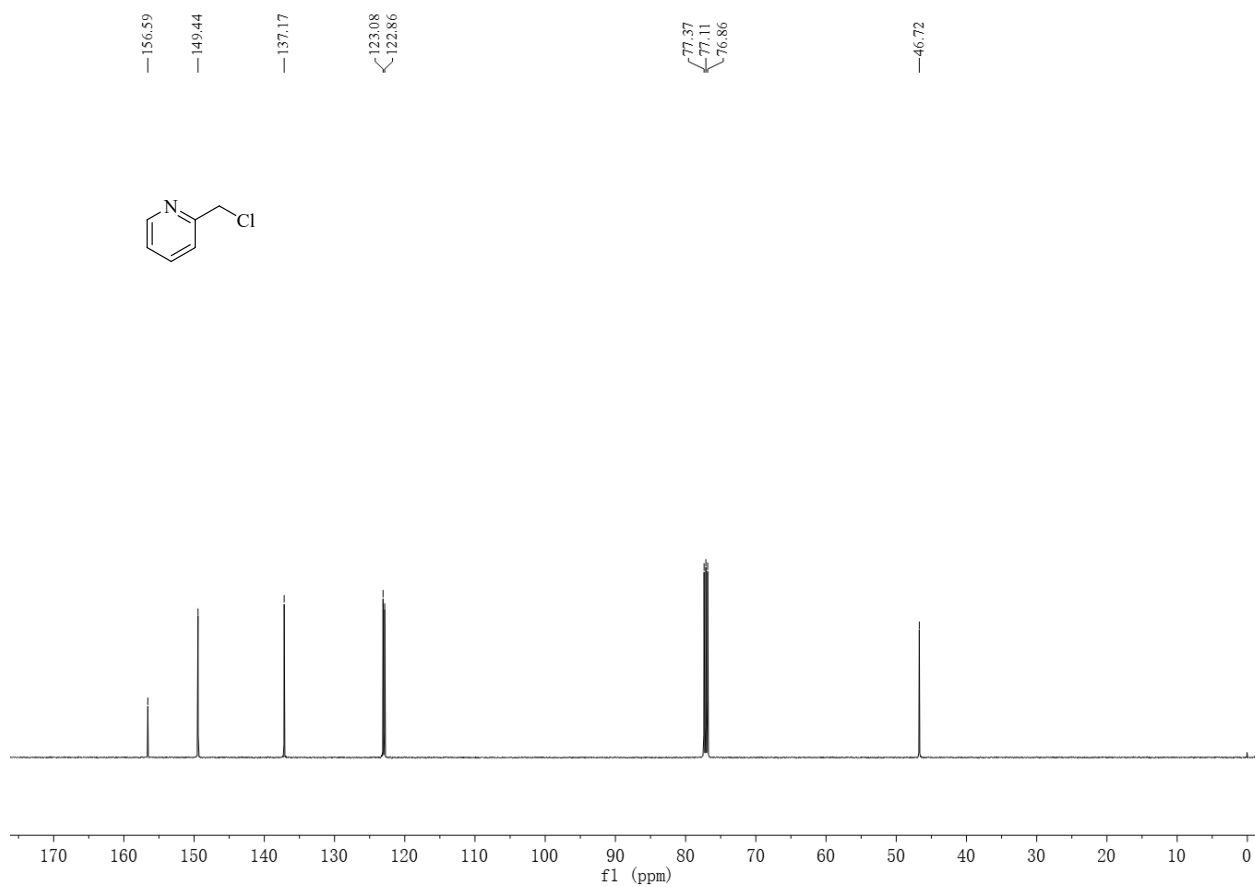

# GS-MS of chlorination of 2-methylpyridine reaction solution

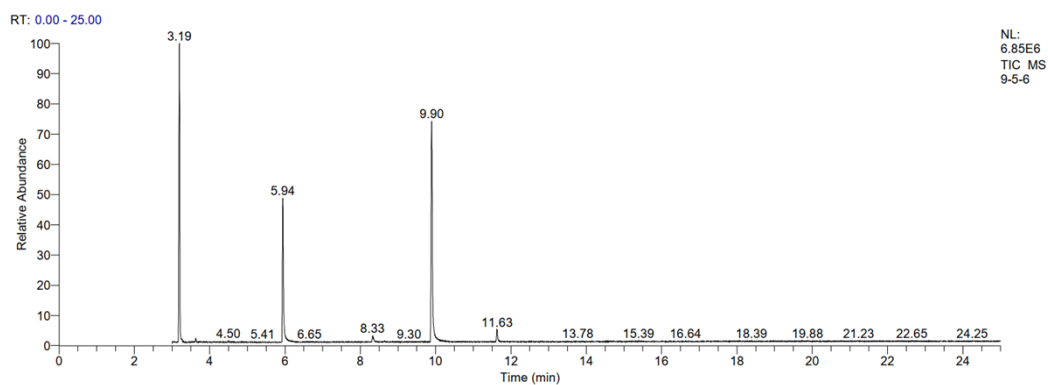

9-5-6 #3975 RT: 9.89 AV: 1 AV: 5 SB:  
T: (0,0) + c EI Full ms [25.00-350.00]

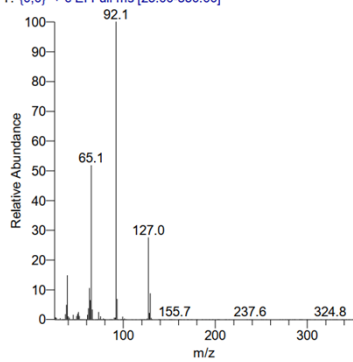

9-5-6 #1696 RT: 5.94 AV: 1 AV: 5 SB:  
T: (0,0) + c EI Full ms [25.00-350.00]

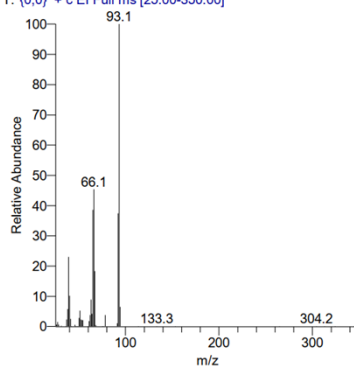

## Chlorination of 2-Methylthiophene

### $^1\text{H}$ NMR of 2-(chloromethyl) thiophene (2u)

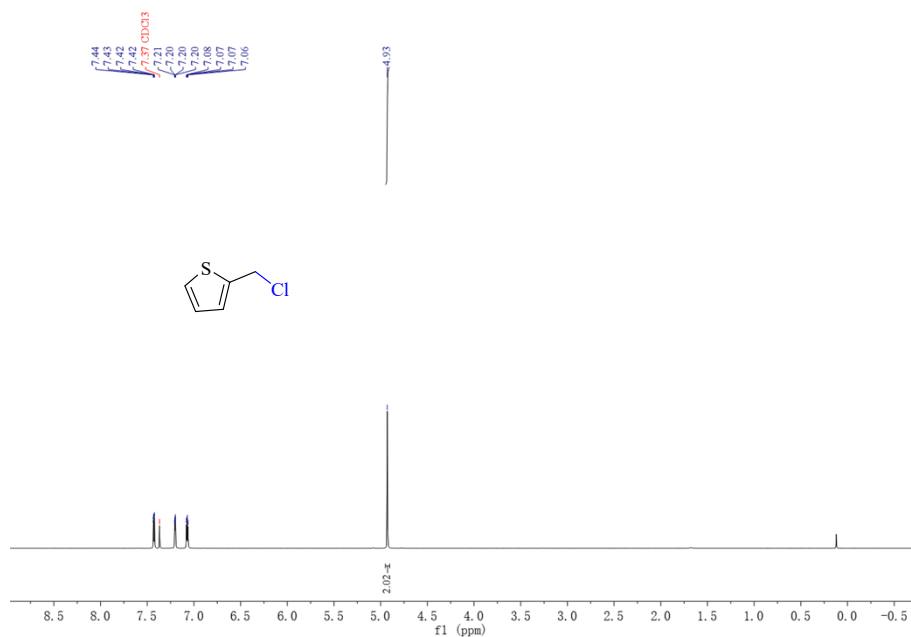

### $^{13}\text{C}$ NMR of 2-(chloromethyl) thiophene (2u)

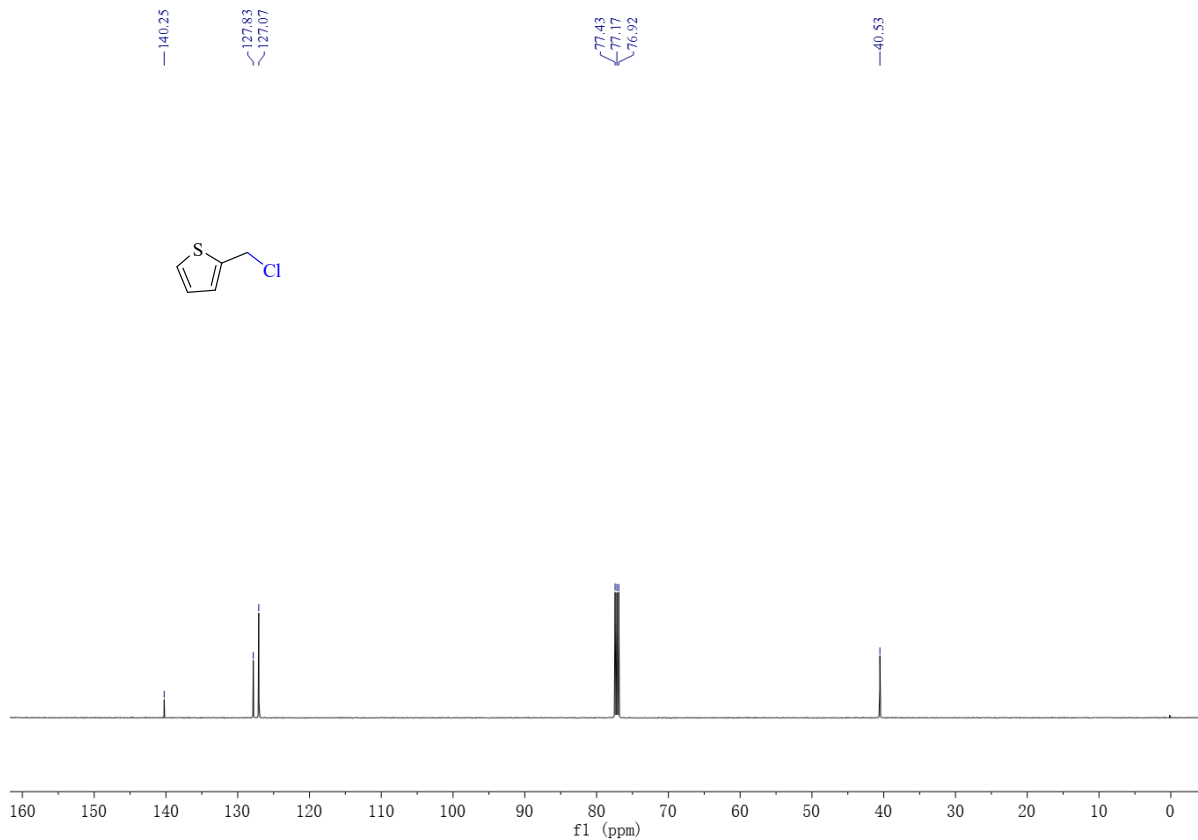



# GS-MS of chlorination of 2-Methylthiophene reaction solution

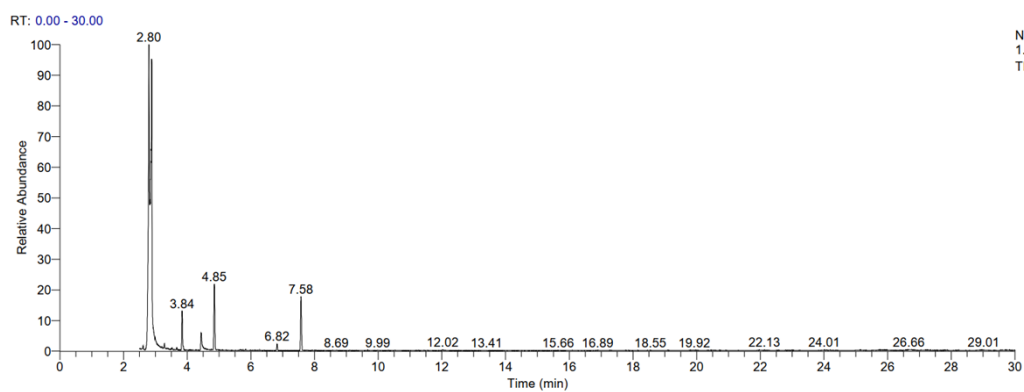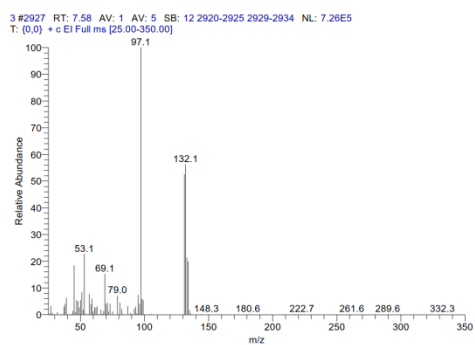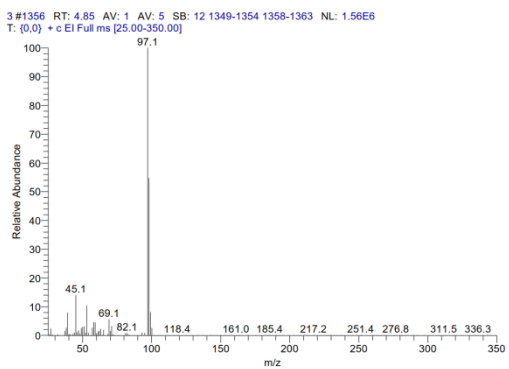

## Chlorination of cyclohexan

### <sup>1</sup>HNMR of Chlorocyclohexane (2w)

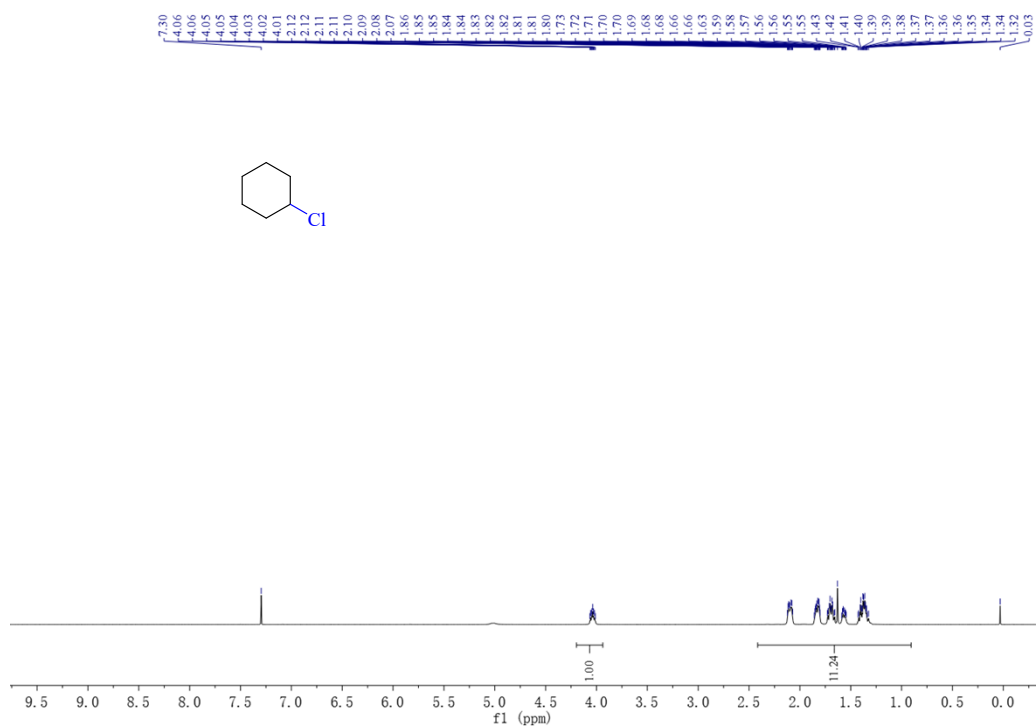

### <sup>13</sup>CNMR of Chlorocyclohexane (2w)

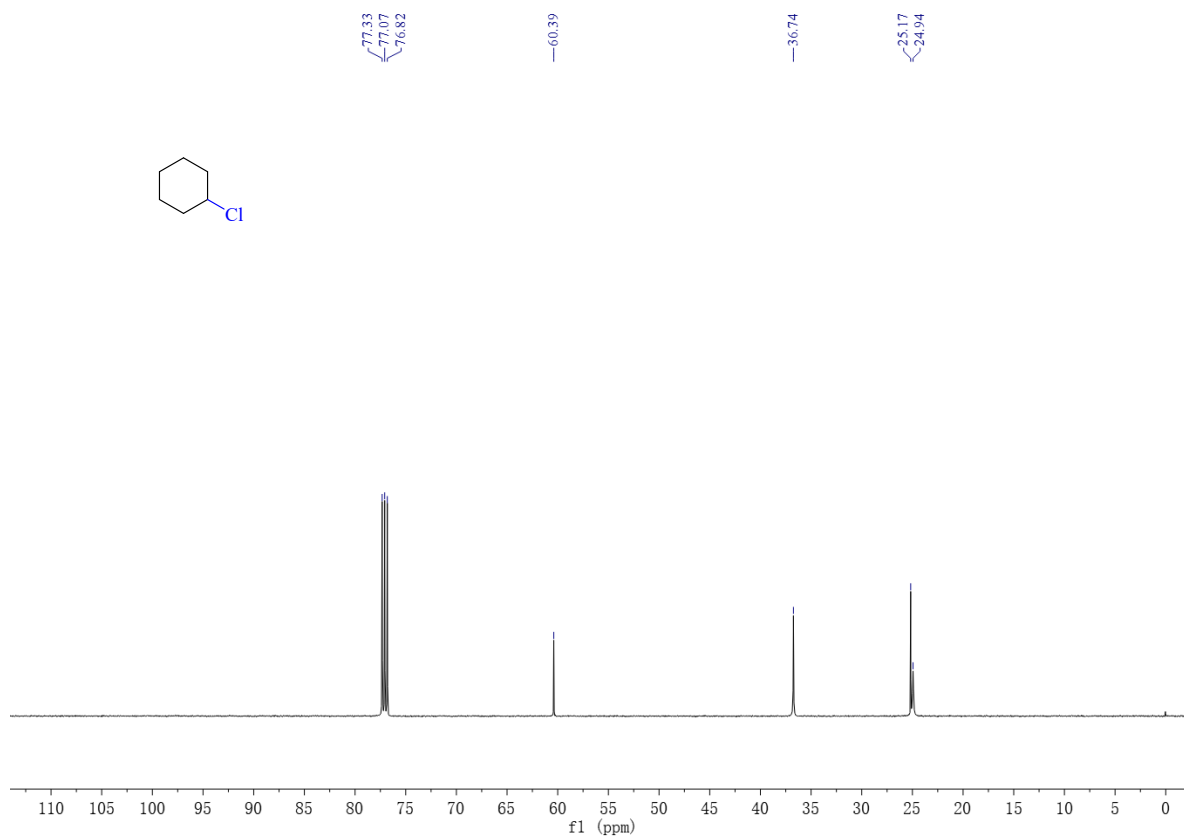

# GS-MS of chlorination of cyclohexan reaction solution

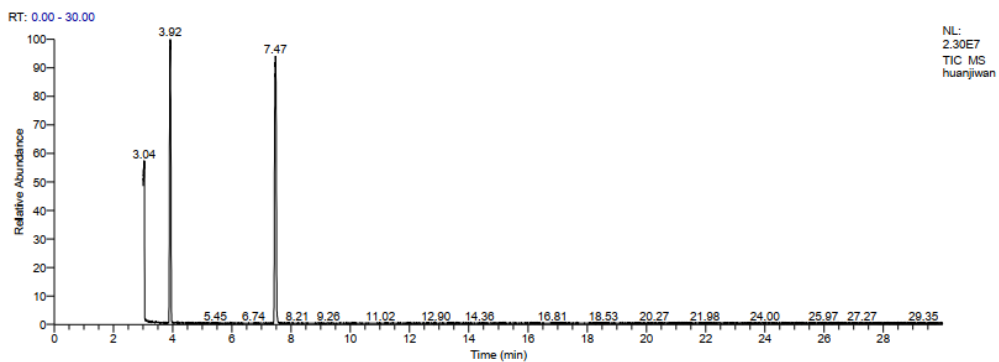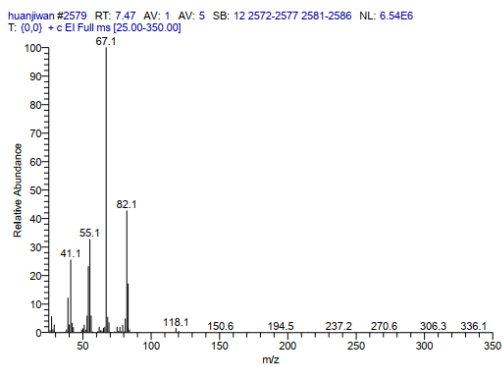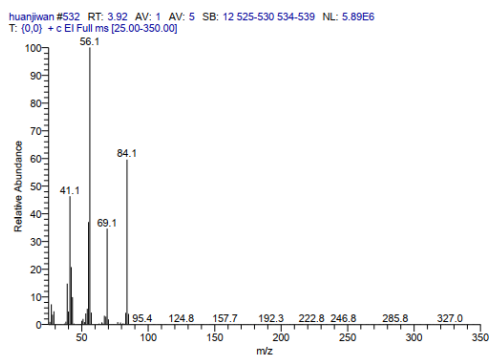

## Chlorination of 2,3-dimethylbutane

### $^1\text{H}$ NMR of 1-chloro-2,3-dimethylbutane (2x)

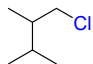

### GS-MS of chlorination of 2,3-dimethylbutane reaction solution

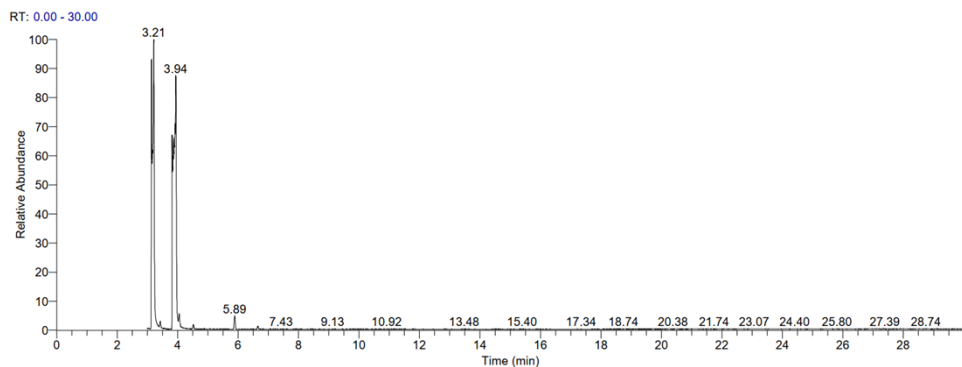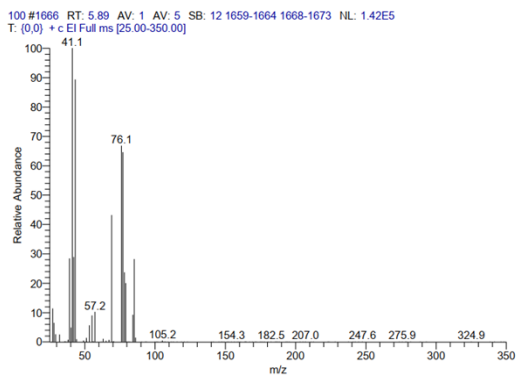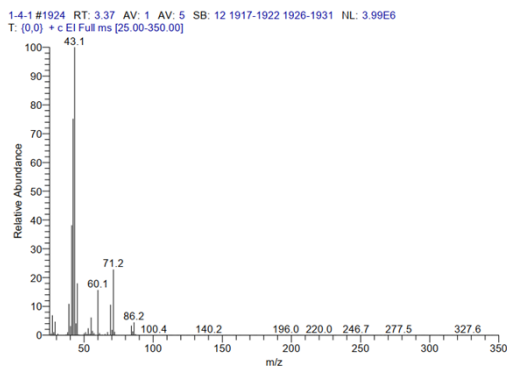

## Chlorination of acetophenone

### <sup>1</sup>HNMR of 2-Chloroacetophenone (4a)

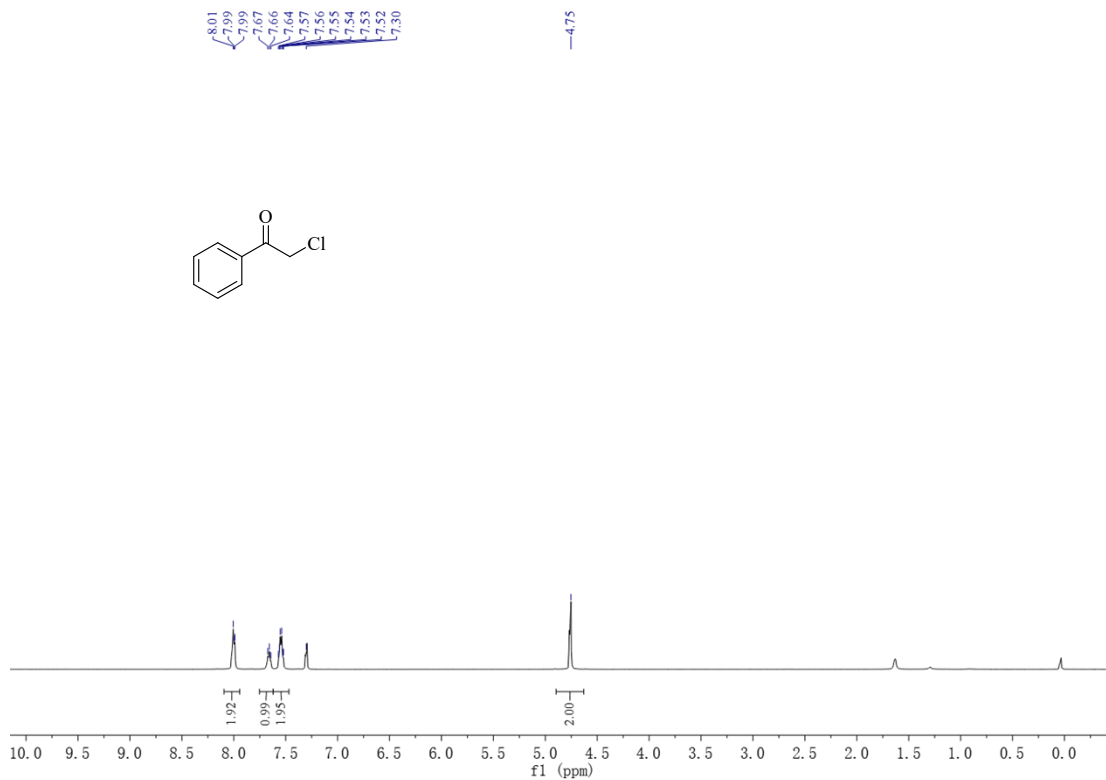

### <sup>13</sup>CNMR of 2-Chloroacetophenone (4a)

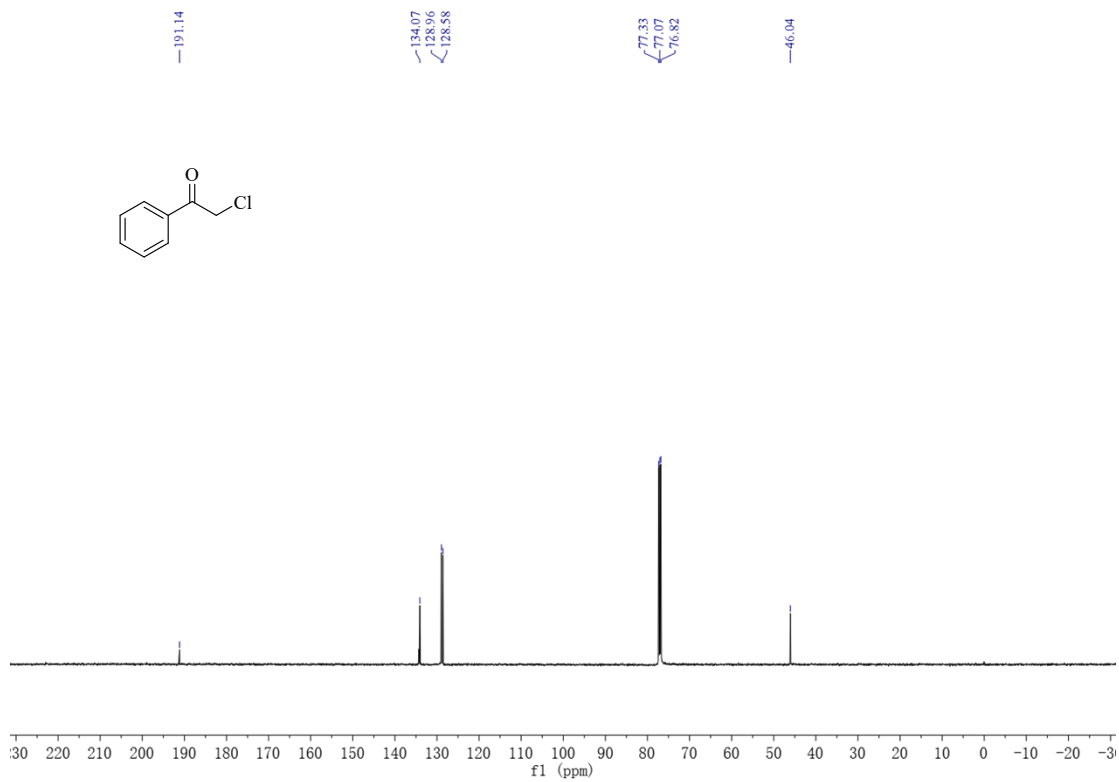

## GS-MS of chlorination of acetophenone reaction solution

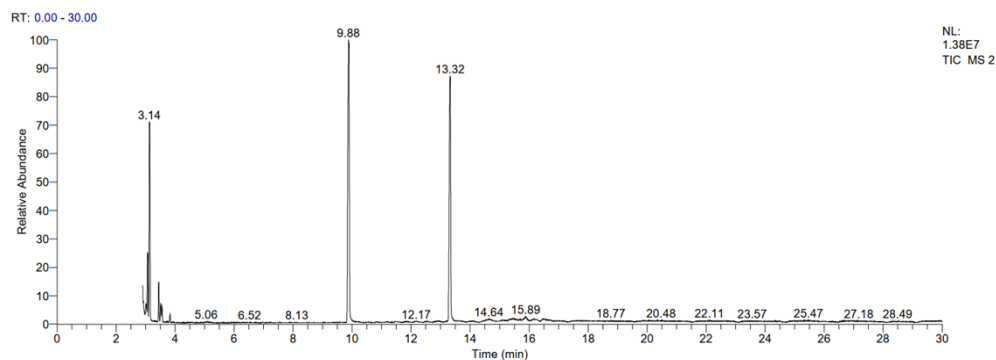

2 #6007 RT: 13.32 AV: 1 AV: 5 SB: 12 6000-6005 6009-6014 NL: 4.66E6  
T: (0,0) + c EI Full ms [25.00-350.00]

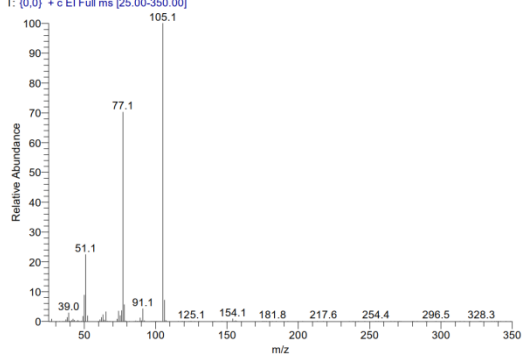

2 #4026 RT: 9.88 AV: 1 AV: 5 SB: 12 4019-4024 4028-4033 NL: 4.28E6  
T: (0,0) + c EI Full ms [25.00-350.00]

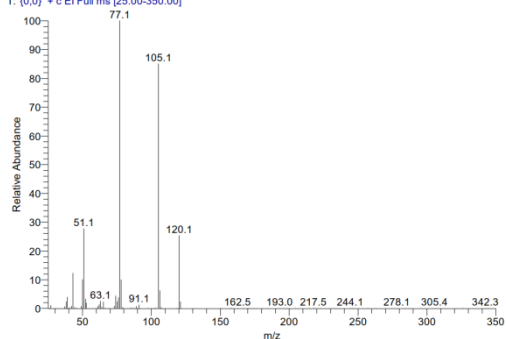

## Chlorination of 4-Cl-acetophenone

### <sup>1</sup>HNMR of 2,4'-Dichloroacetophenone (4b)

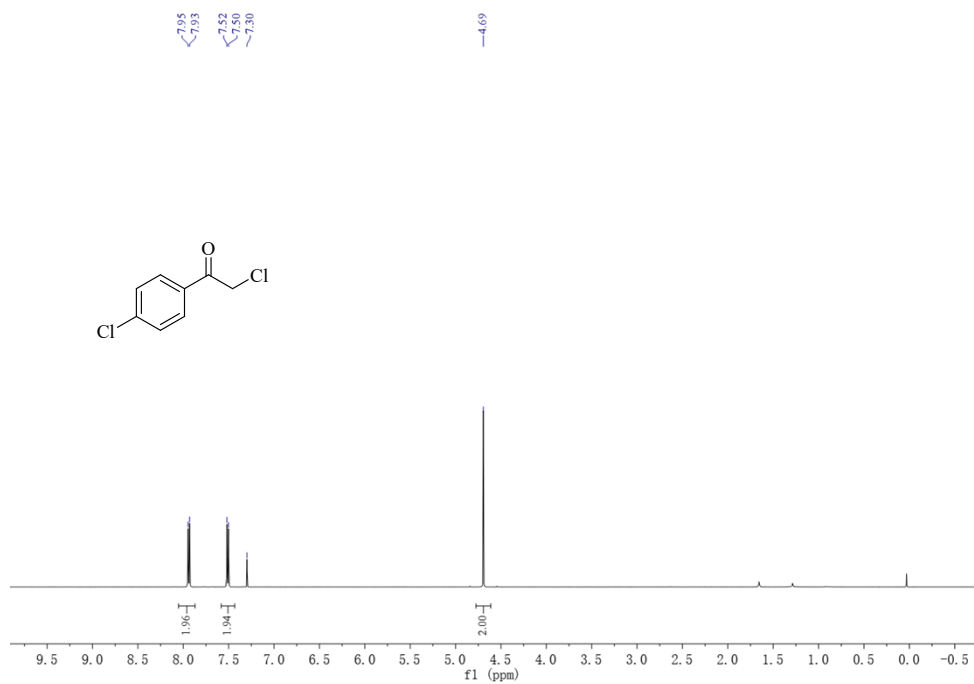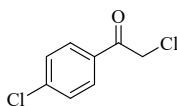

### <sup>13</sup>CNMR of 2,4'-Dichloroacetophenone (4b)

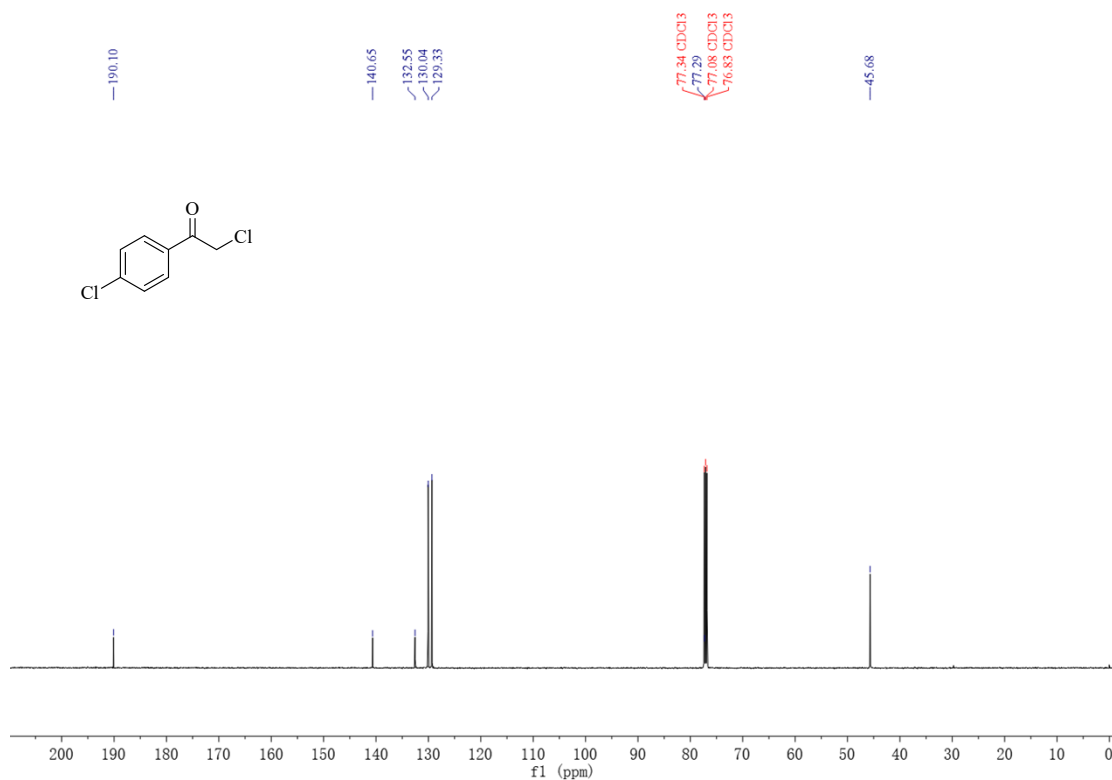

### GS-MS of chlorination of 4-Cl-acetophene reaction solution

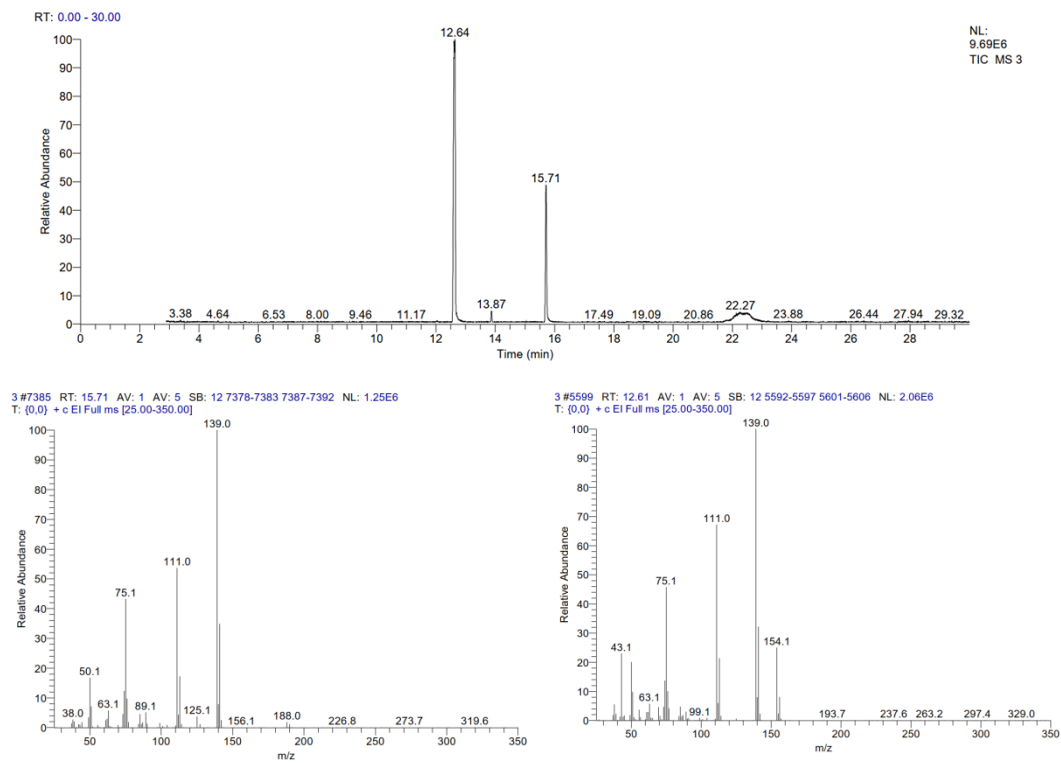

## Chlorination of 4-MeO-acetophene

### <sup>1</sup>HNMR of 2-Chloro-1-(4-methoxyphenyl)ethanone (4c)

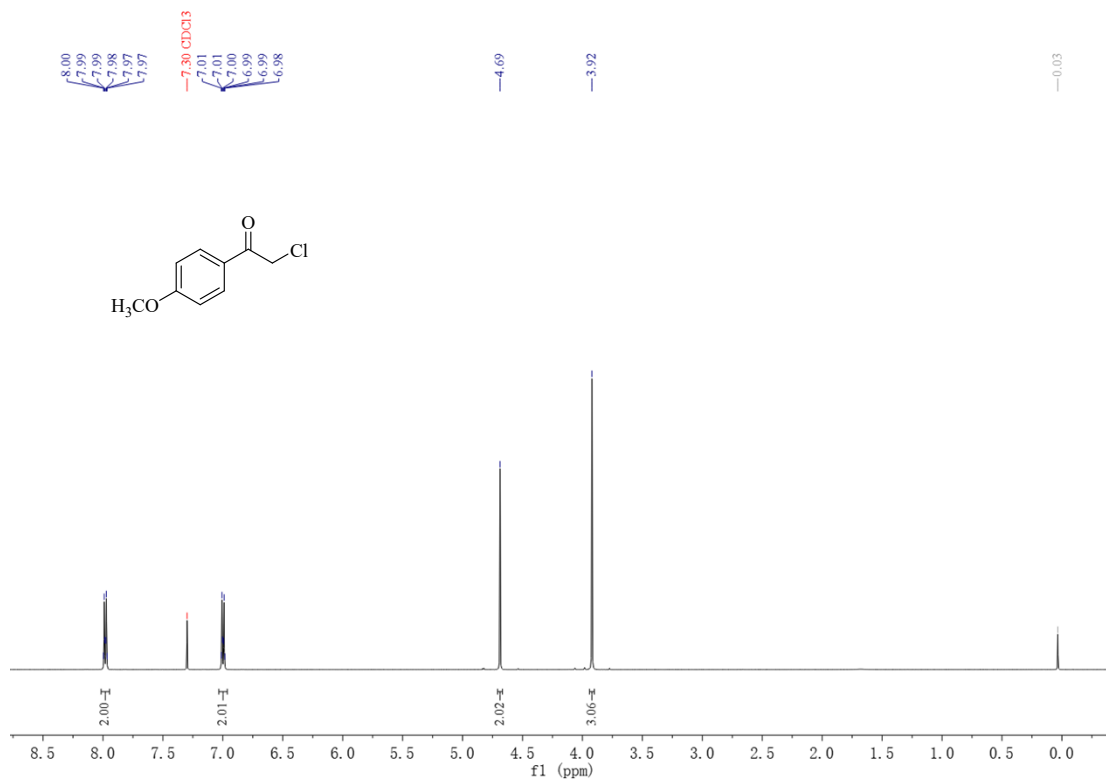

### <sup>13</sup>CNMR of 2-Chloro-1-(4-methoxyphenyl)ethanone (4c)

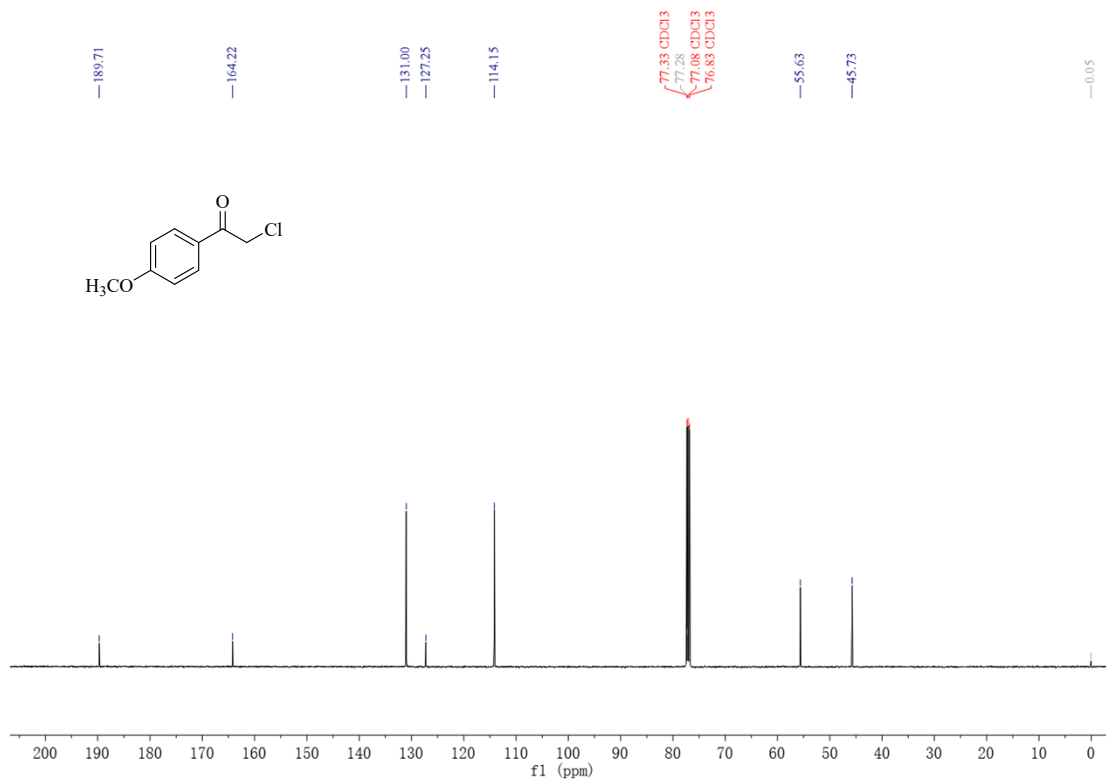



# GS-MS of chlorination of 4-OMe-acetophene reaction solution

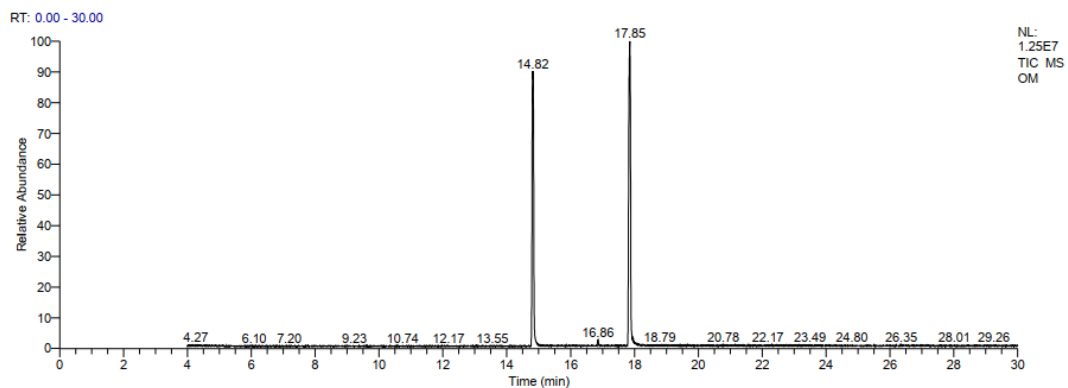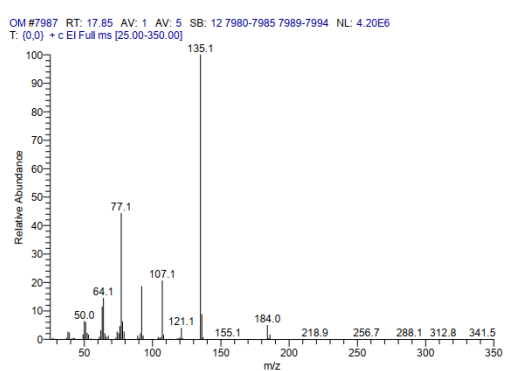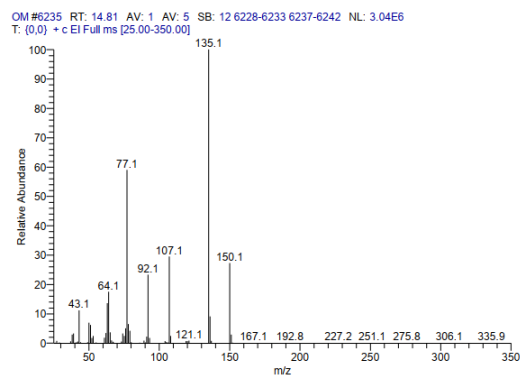

## Chlorination of 3,3-dimethyl-2-butanone

### <sup>1</sup>H NMR of 1-Cl-3,3-dimethyl-2-butanone (4d)

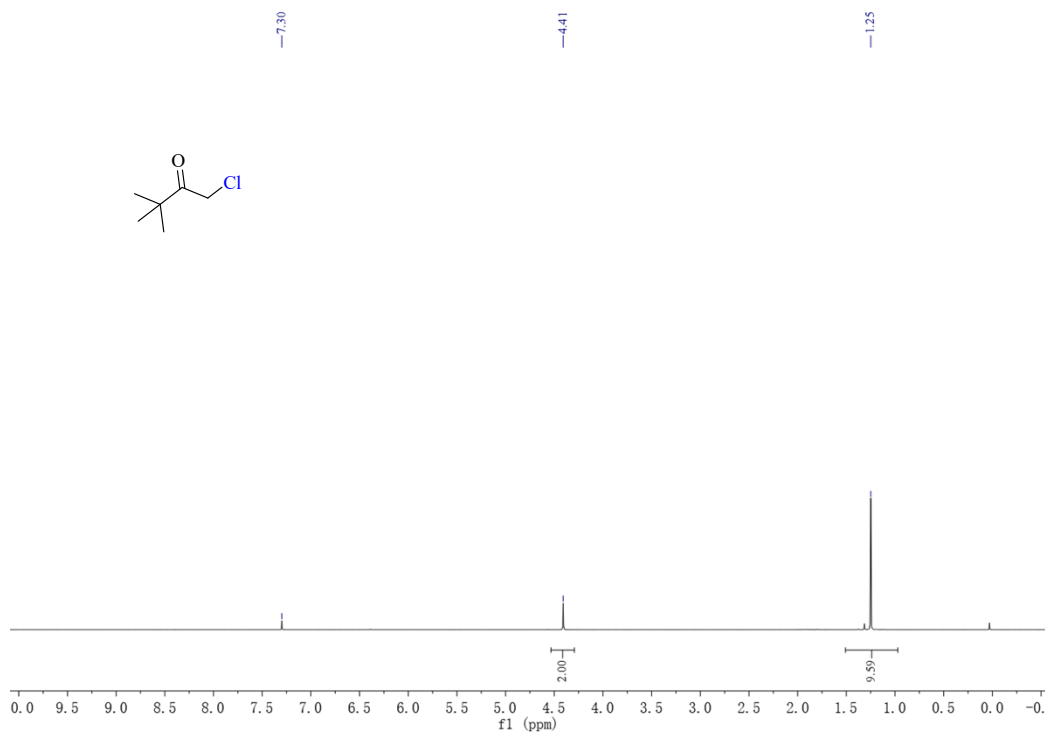

### <sup>13</sup>C NMR of 1-Cl-3,3-dimethyl-2-butanone (4d)

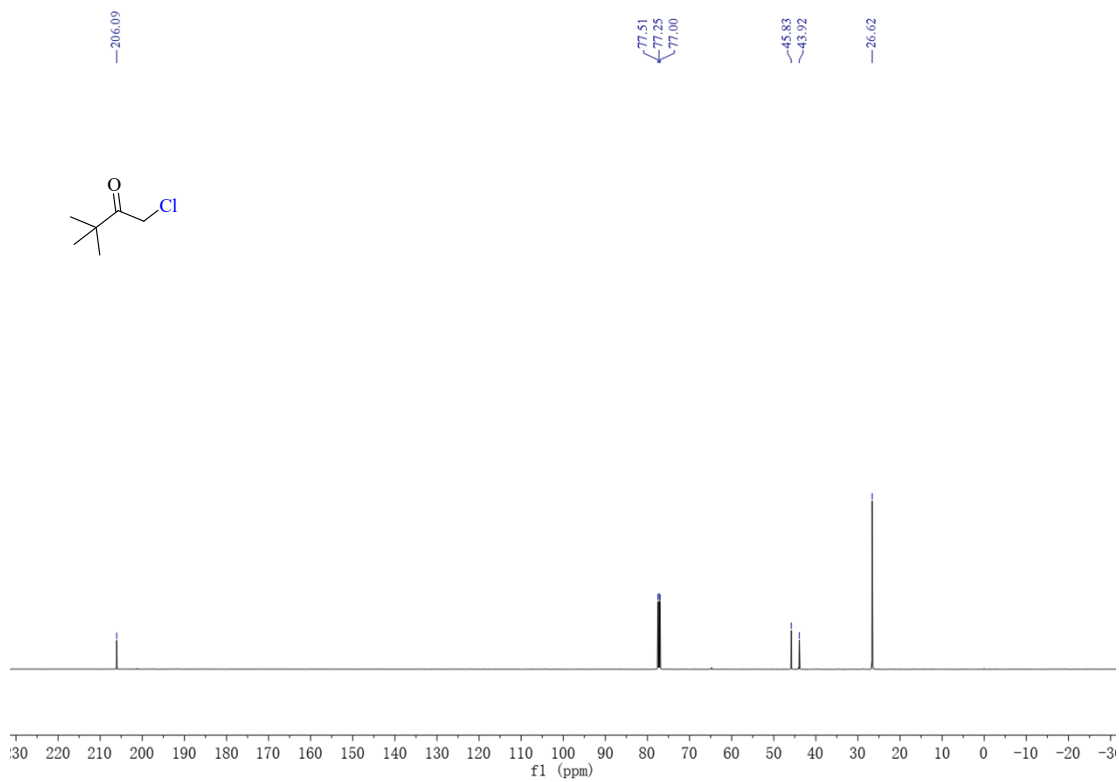

# GS-MS of chlorination of 3,3-dimethyl-2-butanone reaction solution

RT: 0.00 - 29.82

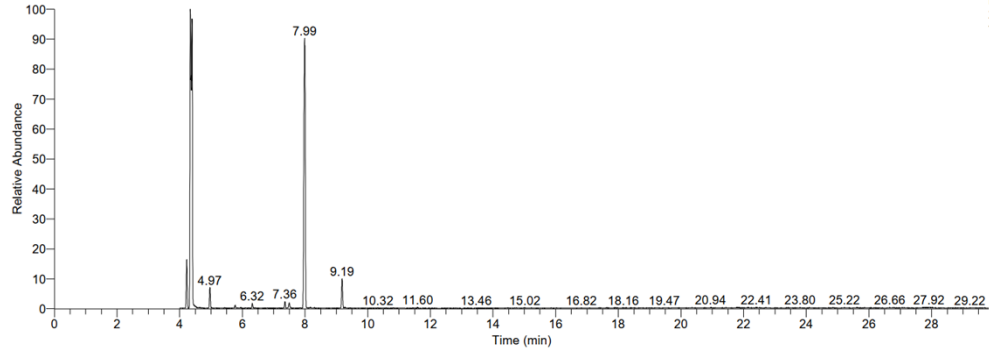

4 #2300 RT: 7.99 AV: 1 AV: 5 SB: 12 2293-2298 2302-2307 NL: 7.83E6  
T: (0.0) + c EI Full ms [25.00-350.00]

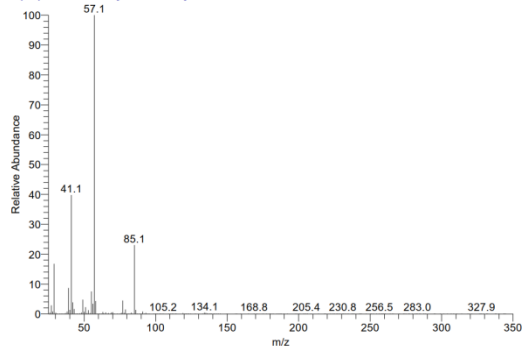

4 #195 RT: 4.34 AV: 1 AV: 5 SB: 12 188-193 197-202 NL: 7.42E6  
T: (0.0) + c EI Full ms [25.00-350.00]

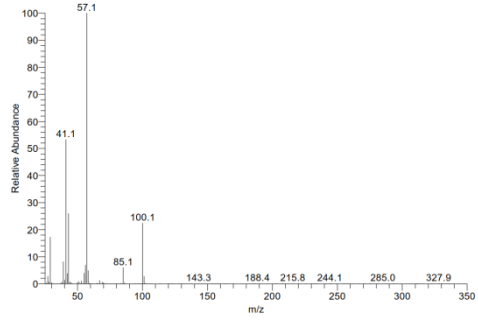

## Chlorination of cyclohexanone

### <sup>1</sup>HNMR of 2-Cl-cyclohexanone (4e)

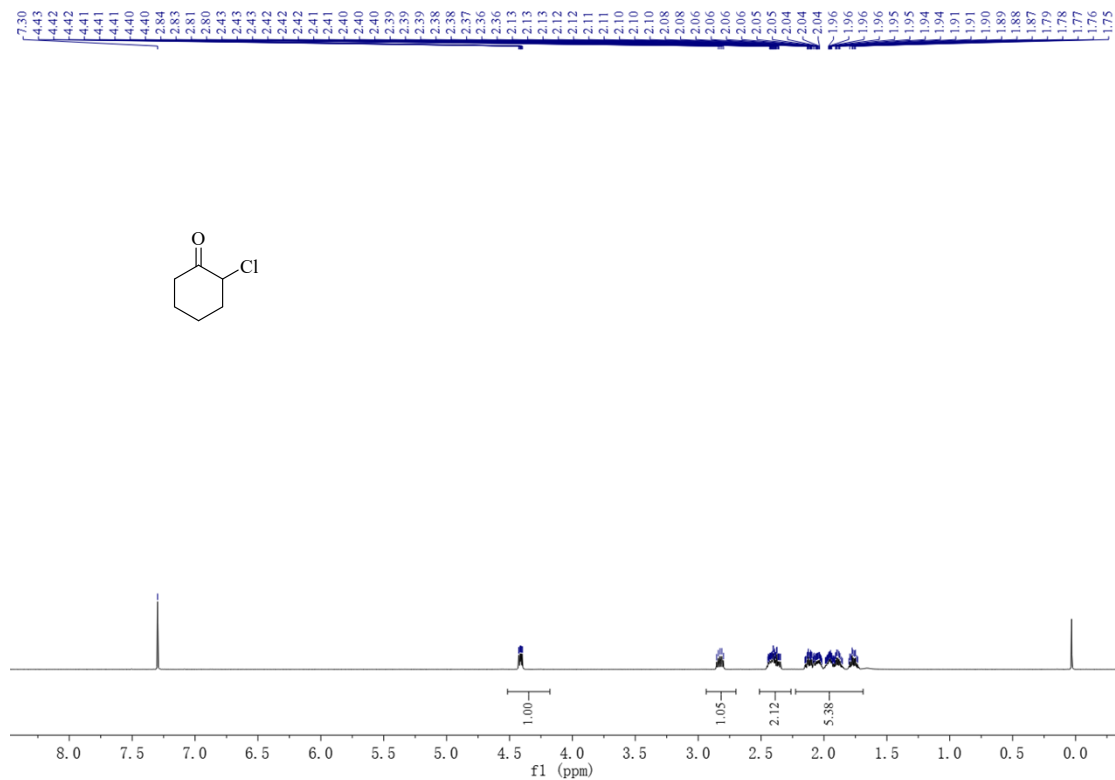

### <sup>13</sup>CNMR of 2-Cl-cyclohexanone (4e)

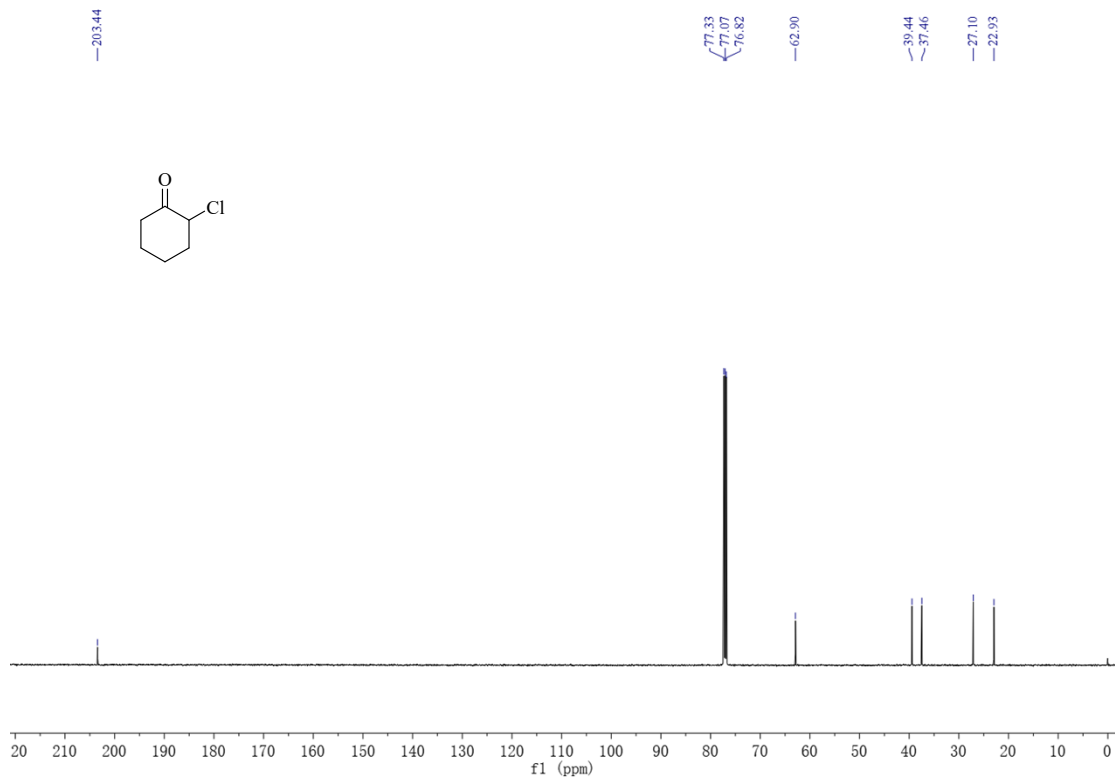

## GS-MS of chlorination of cyclohexanone reaction solution

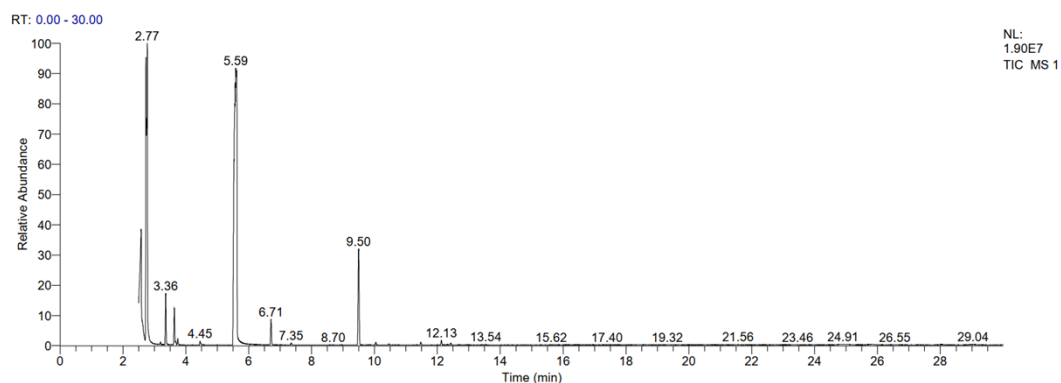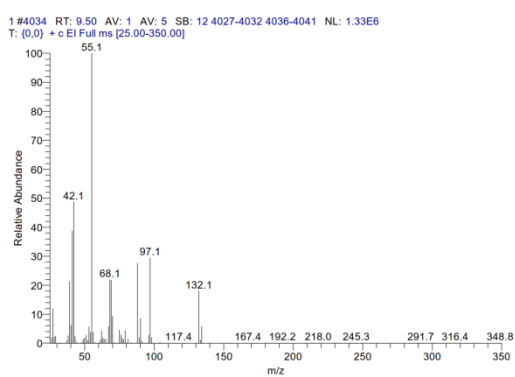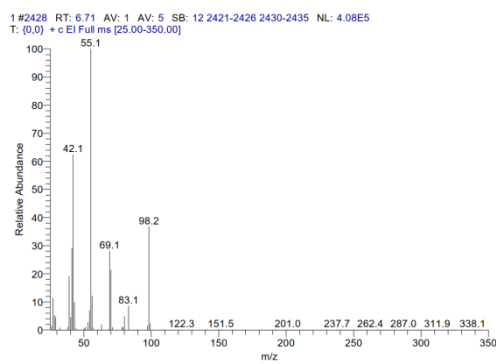

## References

1. Gaussian 16, Revision A.03, M. J. Frisch, G. W. Trucks, H. B. Schlegel, G. E. Scuseria, M. A. Robb, J. R. Cheeseman, G. Scalmani, V. Barone, G. A. Petersson, H. Nakatsuji, X. Li, M. Caricato, A. V. Marenich, J. Bloino, B. G. Janesko, R. Gomperts, B. Mennucci, H. P. Hratchian, J. V. Ortiz, A. F. Izmaylov, J. L. Sonnenberg, D. Williams-Young, F. Ding, F. Lipparini, F. Egidi, J. Goings, B. Peng, A. Petrone, T. Henderson, D. Ranasinghe, V. G. Zakrzewski, J. Gao, N. Rega, G. Zheng, W. Liang, M. Hada, M. Ehara, K. Toyota, R. Fukuda, J. Hasegawa, M. Ishida, T. Nakajima, Y. Honda, O. Kitao, H. Nakai, T. Vreven, K. Throssell, J. A. Montgomery, Jr., J. E. Peralta, F. Ogliaro, M. J. Bearpark, J. J. Heyd, E. N. Brothers, K. N. Kudin, V. N. Staroverov, T. A. Keith, R. Kobayashi, J. Normand, K. Raghavachari, A. P. Rendell, J. C. Burant, S. S. Iyengar, J. Tomasi, M. Cossi, J. M. Millam, M. Klene, C. Adamo, R. Cammi, J. W. Ochterski, R. L. Martin, K. Morokuma, O. Farkas, J. B. Foresman, and D. J. Fox, Gaussian, Inc., Wallingford CT, **2016**.
2. S. Grimme, Semiempirical GGA-type density functional constructed with a long-range dispersion correction *J. Comput. Chem.* **2006**, *27*, 1787.
3. A. V. Marenich, C. J. Cramer, D. G. Truhlar, Universal Solvation Model Based on Solute Electron Density and on a Continuum Model of the Solvent Defined by the Bulk Dielectric Constant and Atomic Surface Tensions. *J. Phys. Chem. B.*, **2009**, *113*, 6378.
